# Supplementary material for: Bipolar multiplex families have an increased burden of common risk variants for psychiatric disorders
Source: PubMed Central journal article supplement (PMC7985020; doi:10.1038/s41380-019-0558-2), 2019-11-11
Supplement: 41380_2019_558_MOESM1_ESM.pdf [file 41380_2019_558_MOESM1_ESM.pdf]

# Bipolar multiplex families have an increased burden of common risk variants for psychiatric disorders

## Supplementary Material

### *Table of Contents*

**Supplementary Methods:** Sample description, quality control, population substructure analysis, imputation, generation and analysis of PRS.

**Supplement. Discussion:** Discussion of the analyses of FAM<sub>MDD</sub> cases.

### **Supplement. References**

**Supplementary Fig. S1:** Boxplots of PRS at different  $p$ -value thresholds for CC<sub>controls</sub>, FAM<sub>unaffected</sub>, and BD cases.

**Supplementary Fig. S2:** Association analysis comparing PRS in FAM<sub>BD</sub> cases and CC<sub>controls</sub>.

**Supplementary Fig. S3:** Association analysis comparing PRS in FAM<sub>BD</sub> cases and unrelated CC<sub>BD</sub> cases.

**Supplementary Fig. S4:** Association analysis comparing PRS in FAM<sub>unaffected</sub> and CC<sub>controls</sub>.

**Supplementary Fig. S5:** Association analysis comparing PRS in FAM<sub>BD</sub> cases and FAM<sub>unaffected</sub>.

**Supplementary Fig. S6:** Analysis of assortative mating.

**Supplementary Fig. S7:** Analysis of anticipation in the FAM sample.

**Supplementary Fig. S8:** Boxplots of PRS at different  $p$ -value thresholds, including FAM<sub>MDD</sub> cases.

**Supplementary Fig. S9:** Association analysis comparing PRS in FAM<sub>MDD</sub> cases and CC<sub>controls</sub>.

**Supplementary Fig. S10:** Association analysis comparing PRS in FAM<sub>MDD</sub> cases and FAM<sub>unaffected</sub>.

**Supplementary Fig. S11:** Population substructure analysis.

**Supplementary Fig. S12:** Association analysis comparing BD PRS in unrelated CC<sub>BD</sub> cases and CC<sub>controls</sub>.

### **IGAP Supplementary Methods and Acknowledgments**

**Authors of the Bipolar Disorder Working Group of the PGC**

**Authors of the Major Depressive Disorder Working Group of the PGC**

*Supplementary Tables in the separate Excel file:*

- Supplementary Table S1:** Test statistics of the demographic comparisons between the different samples (see Table 1).
- Supplementary Table S2:** The number of variants used for calculation of each PRS (after clumping).
- Supplementary Table S3:** Full association test results for the comparison of PRS between FAM<sub>BD</sub> cases and CC<sub>controls</sub>. Covariate used: Sex. Married-in family members were excluded.
- Supplementary Table S4:** Full association test results for the comparison of PRS between FAM<sub>BD</sub> cases and unrelated CC<sub>BD</sub> cases. Covariate used: Sex. Married-in family members were excluded.
- Supplementary Table S5:** Full association test results for the comparison of PRS between FAM<sub>unaffected</sub> and CC<sub>controls</sub>. Covariates used: Sex. Married-in family members were excluded.
- Supplementary Table S6:** Full association test results for the comparison of PRS between FAM<sub>BD</sub> cases and FAM<sub>unaffected</sub>. Fixed effects covariates: Sex, age at interview; random effects covariate: married-in status.
- Supplementary Table S7:** Full association test results for the analysis of assortative mating. Covariate used: Sex.
- Supplementary Table S8:** Full association test results for the analysis of anticipation. Covariates used: Sex, age at the interview, diagnostic group (BD/MDD/unaffected). Married-in family members were excluded.
- Supplementary Table S9:** Full association test results for the comparison of PRS between FAM<sub>MDD</sub> cases and CC<sub>controls</sub>. Covariate used: Sex. Married-in family members were excluded.
- Supplementary Table S10:** Full association test results for the comparison of PRS between FAM<sub>MDD</sub> cases and FAM<sub>unaffected</sub>. Fixed effects covariates: Sex, age at interview; random effects covariate: married-in status.
- Supplementary Table S11:** Full association test results for the comparison of BD PRS between unrelated CC<sub>BD</sub> cases and CC<sub>controls</sub>. Covariate used: Sex.

## Supplementary Methods

### Extended FAM sample description

We included 395 members of 33 families in the present analyses. 166 participants were diagnosed with BD (BD type I (BD-I), n=115; BD type II (BD-II), n=41; not otherwise specified (NOS) BD, n=10), 78 with MDD (recurrent MDD (R-MDD), n=53; single episode MDD (SE-MDD), n=17; NOS MDD, n=8), and 151 without a history of an affective disorder.

Diagnoses were assigned by two trained clinicians according to DSM IV using the best estimate approach. Diagnosis and clinical data were based on the Schedule for Affective Disorders and Schizophrenia (SADS)<sup>1</sup>, the Operational Criteria Checklist for Psychotic and Affective Illness (OPCRIT)<sup>2</sup>, the Family Informant Schedule and Criteria (FISC)<sup>3</sup>, and on clinical records.

A severe impairment during the disorder (see Table 1) corresponded to a level of 3 in the OPCRIT item 87 (no function at all in a major life role for more than two days or in-patient treatment has been required or active psychotic symptoms such as delusions or hallucinations have occurred).

### Quality control (QC)

QC of genotype data was conducted in PLINK v1.90b3.36. QC was carried out first on each of both cohorts separately (FAM and CC), followed by a second round of QC on the combined dataset.

#### Sequence of QC steps:

1. FAM (genotyped on Infinium PsychArray BeadChip (PsychChip))  
Before QC: 395 individuals and 588,454 variants
  - 1.1. Removal of SNPs with call rates <98% or a MAF <1%
  - 1.2. Check for individuals with genotyping rates <98% (*none removed*)
  - 1.3. Check for sex mismatches (*none removed*)
  - 1.4. Removal of non-autosomal variants
  - 1.5. Removal of SNPs with call rates <98%, a MAF <1%, or Hardy-Weinberg Equilibrium (HWE) test  $p$ -values < $1 \times 10^{-6}$
  - 1.6. Removal of A/T and G/C SNPs
  - 1.7. Update of variant IDs and positions to the IDs and positions in the 1000 Genomes Phase 3 reference panel
  - 1.8. Alignment of alleles to the reference panel
  - 1.9. Removal of duplicated variants and of variants not present in the reference panelAfter QC: 395 individuals and 258,046 variants

2. CC (Illumina HumanOmni1-Quad and Illumina Human610-Quad, combined and quality-controlled as previously published<sup>4</sup>; the QC described here was conducted on the published data)
 

Before QC: 547 individuals and 333,353 variants

  - 2.1. Removal of SNPs with call rates <98% or a MAF <1%
  - 2.2. Check for individuals with genotyping rates <98% (*none removed*)
  - 2.3. Check for sex mismatches (*none removed*)
  - 2.4. Check for genetic duplicates (*none removed*)
  - 2.5. Removal of individuals where the autosomal or X-chromosomal heterozygosity deviated from the mean >4 SD (*six removed*)
  - 2.6. Removal of non-autosomal variants
  - 2.7. Removal of SNPs with call rates <98%, a MAF <1%, or HWE test  $p$ -values < $1 \times 10^{-6}$
  - 2.8. Removal of A/T and G/C SNPs
  - 2.9. Update of variant IDs and positions to the IDs and positions in the 1000 Genomes Phase 3 reference panel
  - 2.10. Alignment of alleles to the reference panel
  - 2.11. Removal of duplicated variants and variants not present in the reference panel

After QC: 541 individuals and 315,634 variants
  
3. Combined dataset of both samples (936 individuals and 116,079 variants)
  - 3.1. Removal of SNPs with call rates <98% or a MAF <1%
  - 3.2. Removal of individuals with genotyping rates <98% (*two removed*)
  - 3.3. Removal of individuals duplicated between both datasets (*31 removed from the CC sample*)
  - 3.4. Removal of genetic outliers with a distance from the mean of >4 SD in the first eight MDS components (*15 removed from the CC sample*)
  - 3.5. Removal of individuals where the autosomal heterozygosity deviated from the mean >4 SD (*eleven removed from the FAM sample*)
  - 3.6. Removal of SNPs with call rates <98%, a MAF <1%, or HWE test  $p$ -values < $1 \times 10^{-6}$
  - 3.7. Removal of individuals from the CC sample that have been recruited as part of the FAM/ABiF cohort (*55 removed*)

After QC: 822 individuals (384 FAM and 438 CC) and 116,067 variants

### Population substructure analysis

For the population substructure analyses, pre-imputation genotype data was used, after the QC steps explained above had been applied. Additional variant filtering steps were: removal of variants with a MAF <0.05 or HWE  $p$ -value < $10^{-3}$ ; removal of variants mapping to the extended MHC region (chromosome 6, 25-35 Mbp) or to a typical inversion site on chromosome 8 (7-13 Mbp); LD pruning (command `--indep-pairwise 200 100 0.2`).

Next, the pairwise identity-by-state (IBS) matrix of all individuals was calculated using the command `--genome` on the filtered genotype data. Multidimensional scaling (MDS) analysis was performed on the IBS matrix using the eigendecomposition-based algorithm in PLINK v1.90b5.

In an MDS analysis, the high relatedness between family members leads to artifacts. To avoid such artifacts, only one person per family was included in population substructure analyses. For each of the 33 families, the individual with the highest absolute values in MDS components 1 and 2 was selected to represent the respective family. Afterwards, the MDS analysis was repeated, using only selected individuals from the FAM sample.

Whether MDS components differ between cohorts was analyzed with logistic regression using the following model without additional covariates:

*cohort (FAM/CC) ~ MDS components.*

The ten calculated MDS components showed association  $p$ -values with cohort  $\geq 0.30$ , except for component 3, which was associated with cohort at nominal significance with  $p=0.036$ . After correction for multiple testing (ten comparisons), this difference observed for component 3 was not significant.

### **Imputation of genotype data**

Genotypes were aligned to the 1000 Genomes Phase 3 reference panel using SHAPEIT v2 (r837) and PLINK v1.90b3.36. Pre-phasing (haplotype estimation) was conducted for each chromosome separately using SHAPEIT with the *--duohmm* option. Imputation was performed using IMPUTE2 v2.3.2 in 5 Mbp chunks with 500 kbp buffers, filtering out variants that are monomorphic in the EUR samples. Chunks with  $<51$  genotyped variants or concordance rates  $<92\%$  were fused with neighboring chunks and re-imputed. Imputed variants with a MAF  $<1\%$  or an INFO metric  $<0.8$  were removed.

Imputed variants in the combined sample after QC: 6,862,461

Imputed variants in the FAM sample after QC: 8,628,089

Note that optimized imputation algorithms for pedigrees exist, for example, GIGI<sup>5</sup>. GIGI mainly improves imputation accuracy of rare variants but does not have a clear advantage over population-based methods regarding common variants. Moreover, GIGI can only impute one pedigree at a time and cannot impute unrelated individuals. As we were only interested in common variation (MAF  $\geq 1\%$ ) and also wanted to analyse a mixed sample of related and unrelated subjects, we chose a population-based imputation method using SHAPEIT and IMPUTE2.

## Generation and analysis of PRS

The GWAS test statistics and imputed variants in our data were merged based on chromosome, position, and alleles of each variant. Summary statistics were then clumped in PLINK v1.90b5.2, based on best-guess genotype data (hard-call threshold 0.3) using the following parameters:

```
--clump-kb 500 --clump-r2 0.1 --clump-p1 1 --clump-p2 1
```

PRS were then calculated in *R* v.3.3 based on imputed (dosage) data. Test statistics and alleles in the GWAS training data were flipped so that effect sizes were always positive. Thus, the weighted PRS represent cumulative, additive risk. PRS were scaled to represent the relative risk load (minimum possible cumulative risk load = 0, maximum = 1). For each disorder, ten PRS with different *p*-value thresholds were calculated:  $<5 \times 10^{-8}$ ,  $<1 \times 10^{-7}$ ,  $<1 \times 10^{-6}$ ,  $<1 \times 10^{-5}$ ,  $<1 \times 10^{-4}$ ,  $<0.001$ ,  $<0.01$ ,  $<0.05$ ,  $<0.1$ ,  $<0.2$ .

The analyses of linear mixed models using *GenABEL* were conducted in the following manner: In the first step of the PRS analyses, residuals were calculated with the *GenABEL polygenic* function using the formula *phenotype ~ covariates* (where the phenotype corresponded to the diagnosis/cohort groups contrasted in a given analysis), including the genetic relationship matrix as a random effect. Residuals from this model were then used in a second linear model with the formula *residuals ~ PRS*. Test statistics including 95% CI were calculated using bootstrapping (*R* package *boot*, nonparametric bootstrapping using ordinary resampling with 2,000 replications).

## Data availability

GWAS summary statistics for PRS calculation can be obtained from the following sources:

PGC BD, MDD, and SCZ GWAS from the Psychiatric Genomics Consortium:  
<https://www.med.unc.edu/pgc/results-and-downloads/>

From these summary statistics, the *Shared* and the simulated PRS can be calculated following the *R* scripts available at:  
<https://gitlab.com/tillandlauer/abif-prs-analyses/>

The GWIS PRS can be calculated following this example:  
<https://sites.google.com/site/mgnivard/gwis/code-example-decompose-2-traits>

The IGAP LOAD GWAS results can be obtained from IGAP:  
[http://web.pasteur-lille.fr/en/recherche/u744/igap/igap\\_download.php](http://web.pasteur-lille.fr/en/recherche/u744/igap/igap_download.php)

For genotype and phenotype data of the CC sample, please contact the corresponding authors of the following study:  
[Mühleisen TW, Leber M, Schulze TG, Strohmaier J, Degenhardt F, Treutlein J \*et al.\* Genome-wide association study reveals two new risk loci for bipolar disorder. \*Nature Communations\* 2014; 5:3339.](#)

For genotype and phenotype data of the ABiF sample, please contact the corresponding authors of the present study.

## Supplementary Discussion

FAM<sub>MDD</sub> cases had significantly higher BD and MDD than CC<sub>controls</sub>. The SCZ, *Shared*, and SCZ-MDD GWIS PRS were increased at nominal significance only in FAM<sub>MDD</sub>. This may be due to the lower genetic correlation of MDD and SCZ compared to the correlation of BD and SCZ<sup>7-10</sup>. However, when interpreting the results for FAM<sub>MDD</sub> cases, it is important to consider that much fewer MDD than BD cases have been analysed (Table 1). The power of MDD-based analyses in the present study was thus considerably lower than for BD. This lower statistical power is also a possible explanation for why FAM<sub>MDD</sub> cases only showed a nominally increased MDD PRS over FAM<sub>unaffected</sub> individuals. In addition to suggesting a cross-disorder illness burden, the increased BD PRS in FAM<sub>MDD</sub> cases may also indicate that, in some cases, the current MDD diagnosis constituted a prodromal stage of BD<sup>11</sup>. Furthermore, in ABiF families, MDD may be more strongly driven by BD risk variants and therefore have closer etiological proximity to BD than is the case for the average MDD patient from the general population.

## Supplementary References

- 1 Spitzer RL. A diagnostic interview: the schedule for affective disorders and schizophrenia. *Arch Gen Psychiatry* 1978; **35**: 837–844.
- 2 McGuffin P, Farmer A, Harvey I. A polydiagnostic application of operational criteria in studies of psychotic illness. Development and reliability of the OPCRIT system. *Arch. Gen. Psychiatry*. 1991; **48**: 764–770.
- 3 Mannuzza S, Fyer AJ, Klein DF, Robins LN. Family informant schedule and criteria (FISC). *New York: Anxiety Disorder Clinic, New York State Psychiatric Institute* 1985.
- 4 Mühleisen TW, Leber M, Schulze TG, Strohmaier J, Degenhardt F, Treutlein J *et al*. Genome-wide association study reveals two new risk loci for bipolar disorder. *Nat Commun* 2014; **5**: 3339.
- 5 Cheung CYK, Thompson EA, Wijsman EM. GIGI: an approach to effective imputation of dense genotypes on large pedigrees. *Am J Hum Genet* 2013; **92**: 504–516.
- 6 Faul F, Erdfelder E, Buchner A, Lang A-G. Statistical power analyses using G\*Power 3.1: tests for correlation and regression analyses. *Behav Res Methods* 2009; **41**: 1149–1160.
- 7 Wray NR, Ripke S, Mattheisen M, Trzaskowski M, Byrne EM, Abdellaoui A *et al*. Genome-wide association analyses identify 44 risk variants and refine the genetic architecture of major depression. *Nature Genetics* 2018; **50**: 668–681.
- 8 Ruderfer DM, Fanous AH, Ripke S, McQuillin A, Amdur RL, Schizophrenia Working Group of Psychiatric Genomics Consortium *et al*. Polygenic dissection of diagnosis and clinical dimensions of bipolar disorder and schizophrenia. *Mol Psychiatry* 2014; **19**: 1017–1024.
- 9 Cross-Disorder Group of the Psychiatric Genomics Consortium. Identification of risk loci with shared effects on five major psychiatric disorders: a genome-wide analysis. *Lancet* 2013; **381**: 1371–1379.
- 10 Cross-Disorder Group of the Psychiatric Genomics Consortium, Lee SH, Ripke S, Neale BM, Faraone SV, Purcell SM *et al*. Genetic relationship between five psychiatric disorders estimated from genome-wide SNPs. *Nature Genetics* 2013; **45**: 984–994.
- 11 Berk M, Dodd S, Callaly P, Berk L, Fitzgerald P, de Castella AR *et al*. History of illness prior to a diagnosis of bipolar disorder or schizoaffective disorder. *J Affect Disord* 2007; **103**: 181–186.



**Supplementary Fig. S1:** Boxplots of PRS at different  $p$ -value thresholds for  $CC_{\text{controls}}$ ,  $FAM_{\text{unaffected}}$ , and BD cases.  $FAM$  samples excluded from the analyses of the combined dataset are not shown in these plots, *i.e.*, family members with a history of substance abuse, married-in family members, or family members diagnosed with MDD.  $CC =$  Case/control sample.

**Supplementary Fig. S1A:** Boxplots of BD PRS.

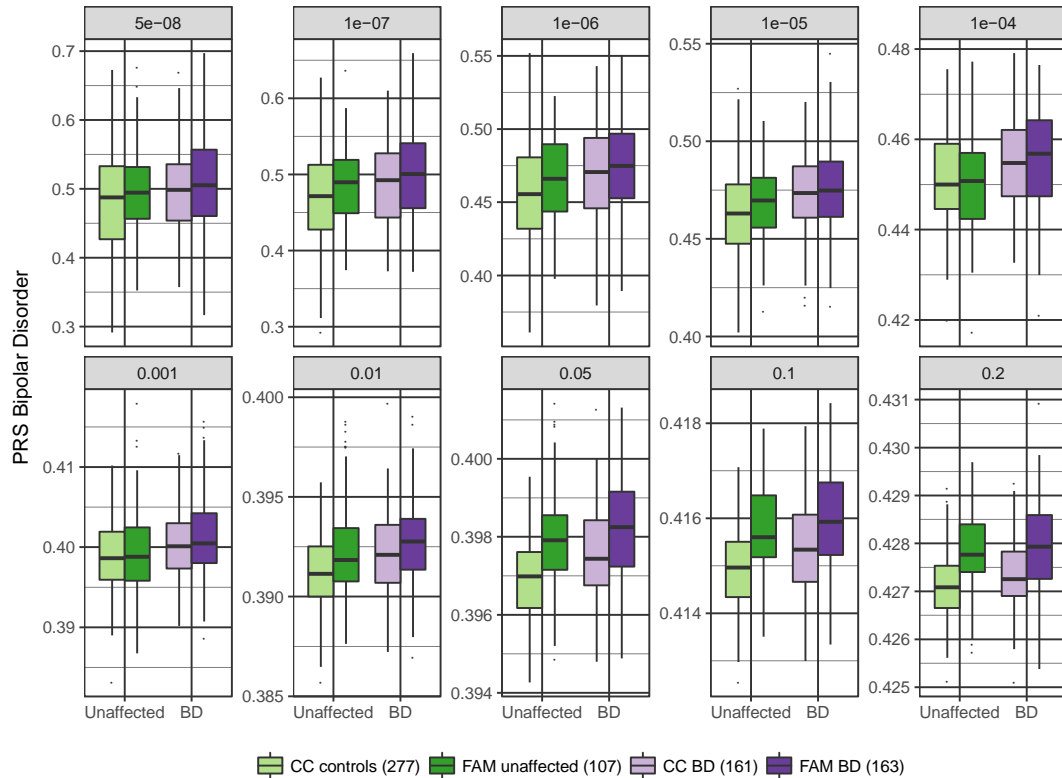

**Supplementary Fig. S1B:** Boxplots of SCZ PRS.

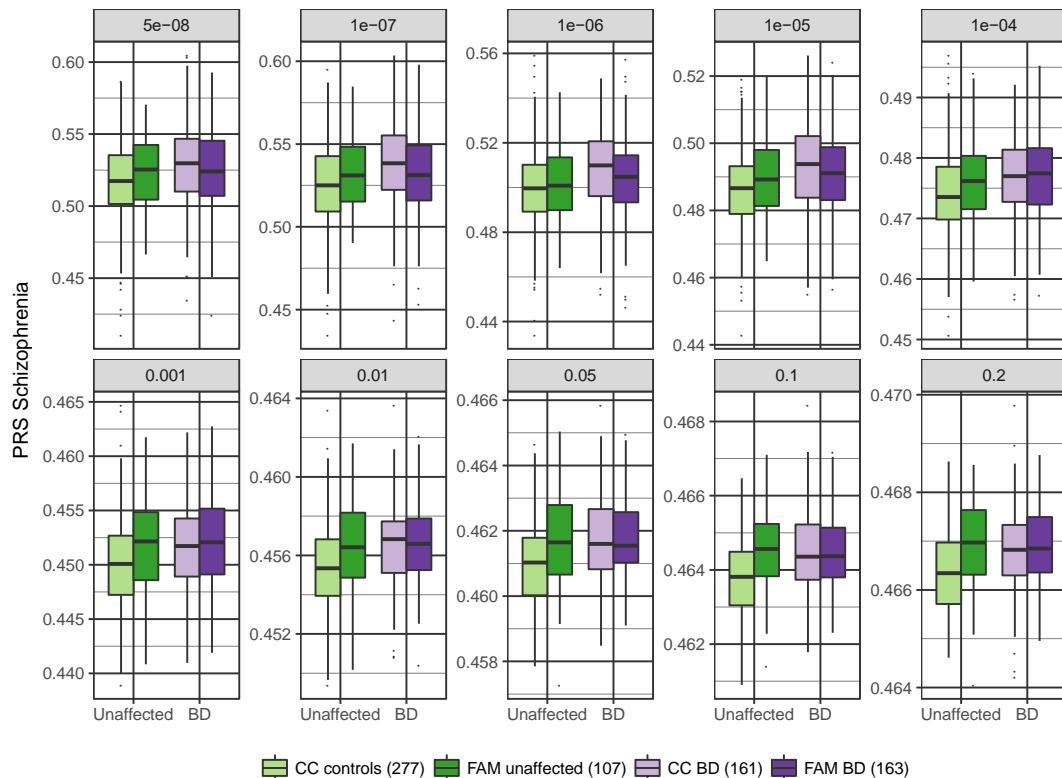

**Supplementary Fig. S1C: Boxplots of MDD PRS.**

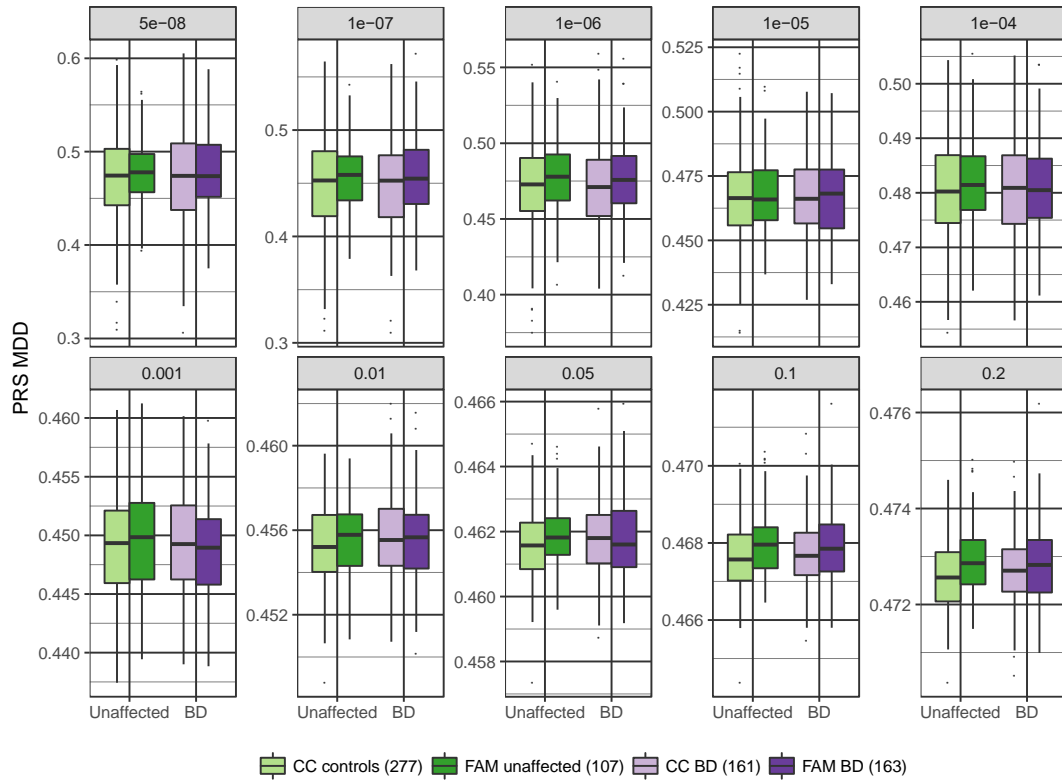

**Supplementary Fig. S1D: Boxplots of the BD+SCZ+MDD Shared PRS.** Note that because of the way this PRS was calculated, the maximum possible threshold was  $p_{PRS}=0.1$ .

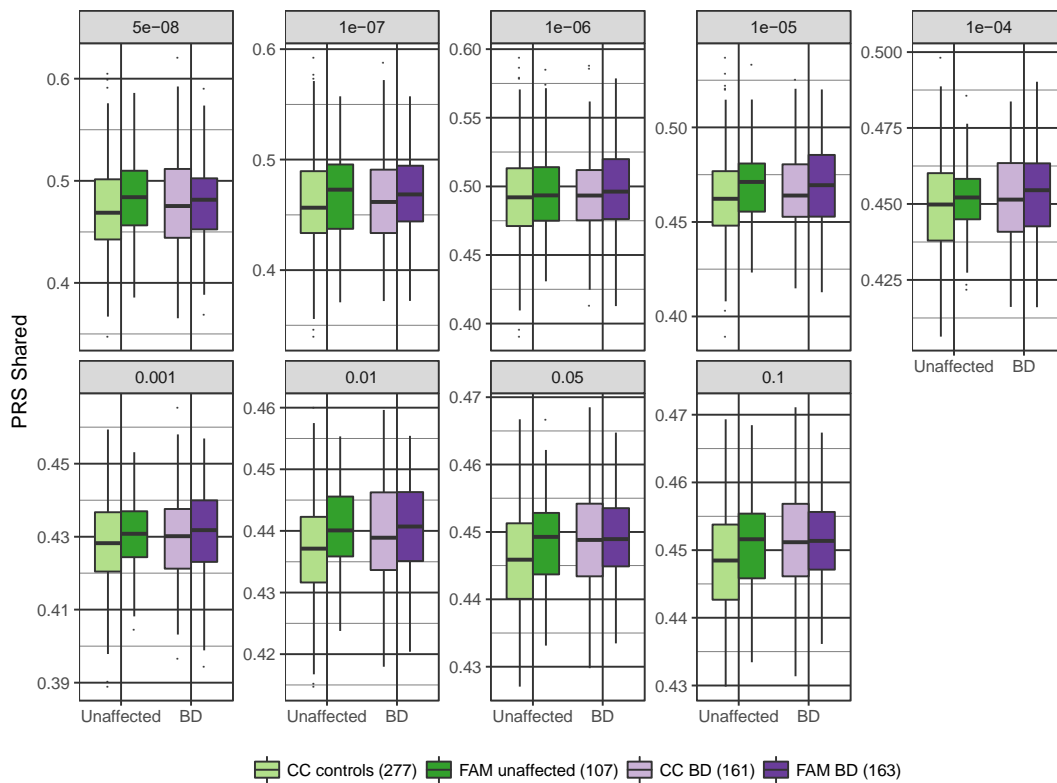

**Supplementary Fig. S1E: Boxplots of the BD-SCZ GWIS PRS.**

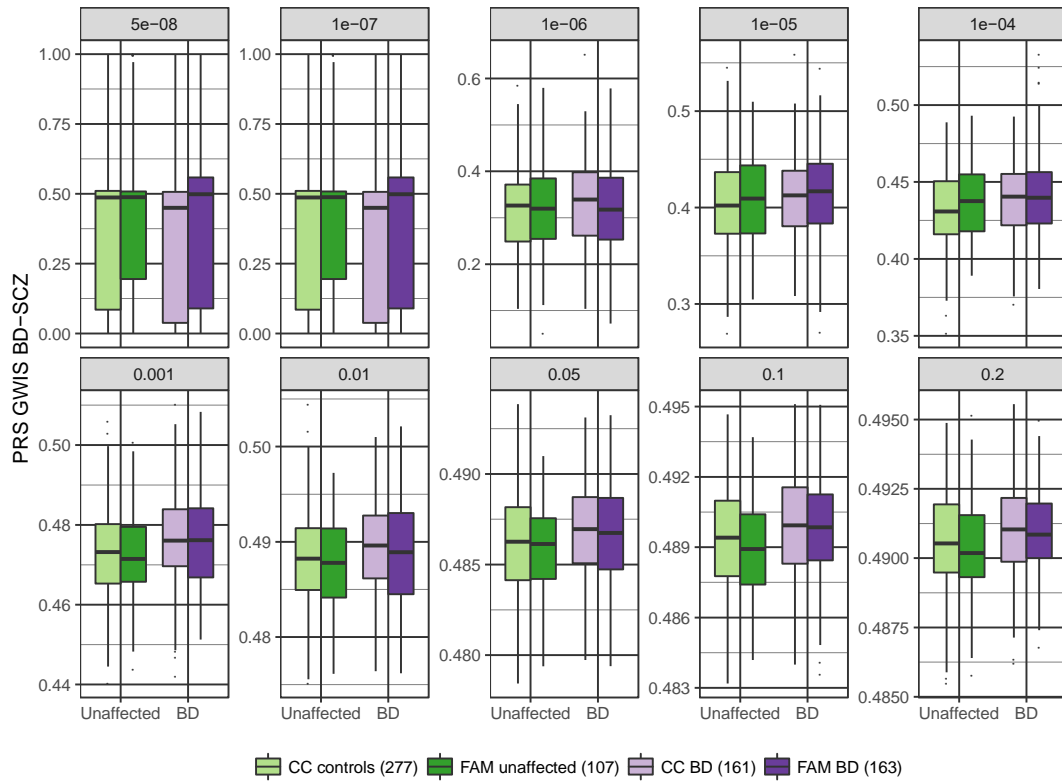

**Supplementary Fig. S1F: Boxplots of the BD-MDD GWIS PRS.**

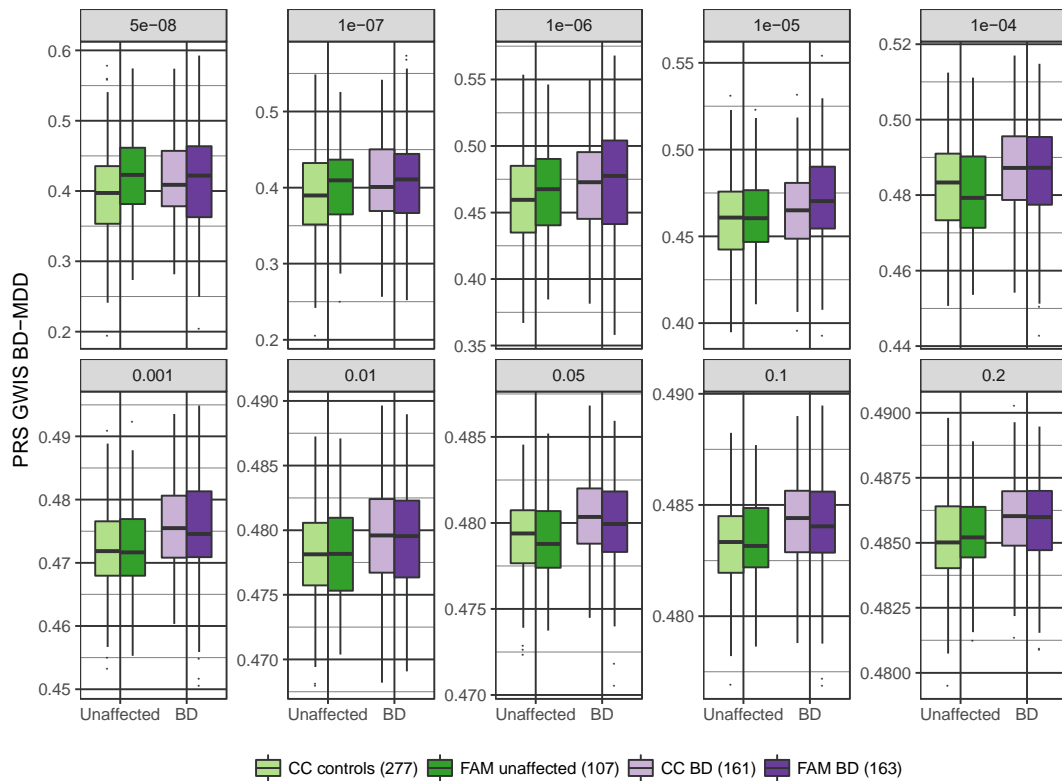

**Supplementary Fig. S1G: Boxplots of the SCZ-BD GWIS PRS.**

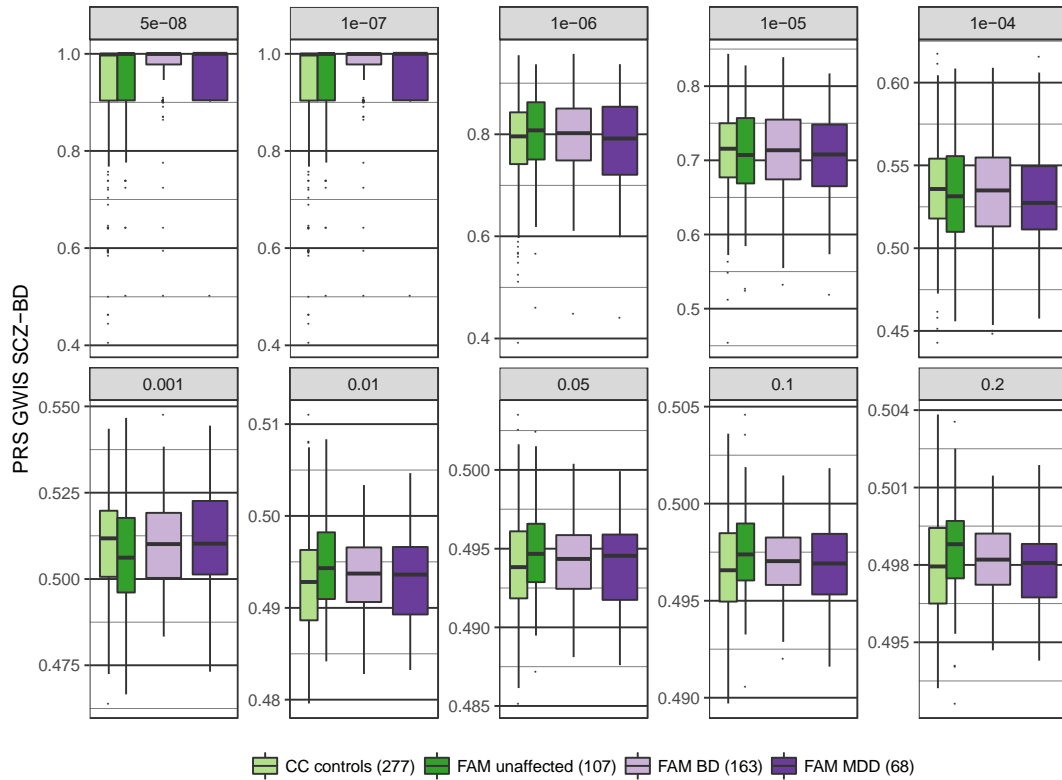

**Supplementary Fig. S1H: Boxplots of the MDD-BD GWIS PRS.**

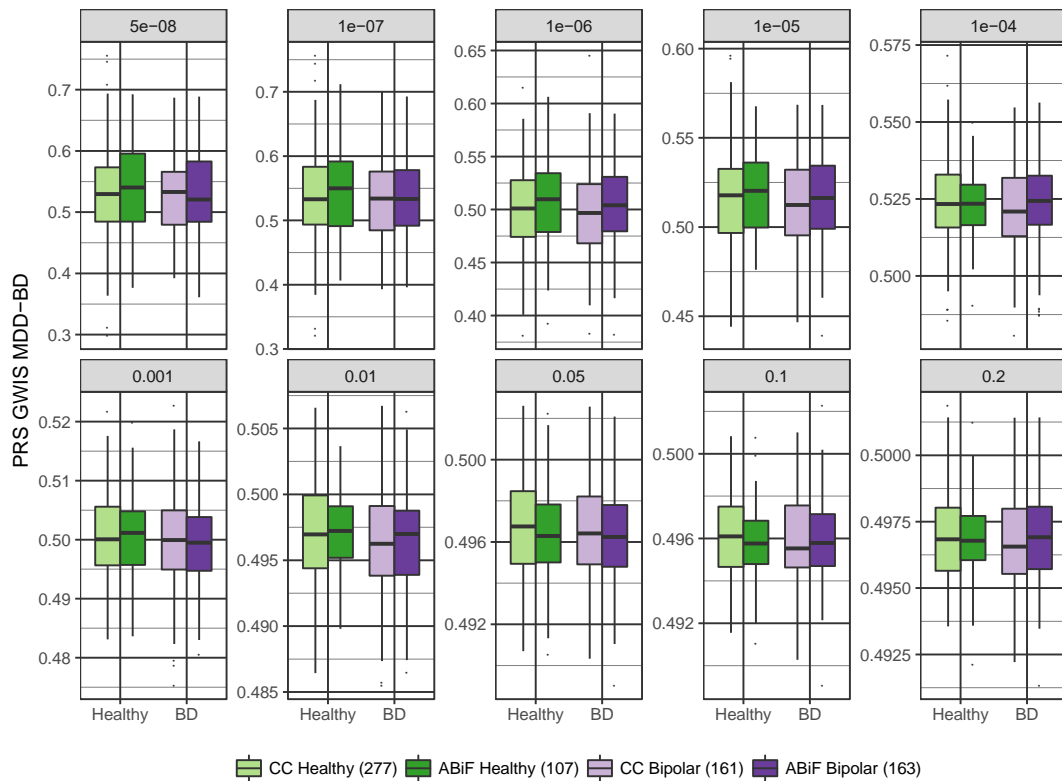

**Supplementary Fig. S1I: Boxplots of the LOAD (Alzheimer) PRS.**

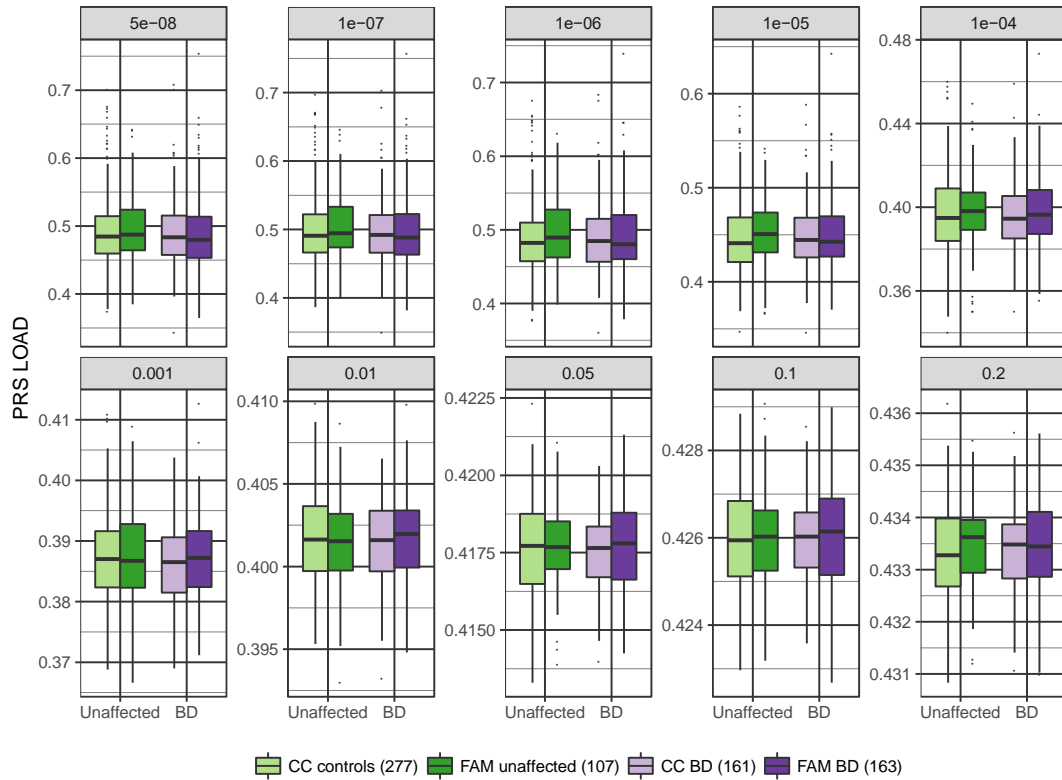

**Supplementary Fig. S2: Association analysis comparing PRS in FAM<sub>BD</sub> cases and CC<sub>controls</sub>.** Further details of the plots are described in the legend for Fig. 1. Full association test statistics including *p*-values are shown in Supplementary Table S3. **Supplementary Fig. S2A: Association of the BD PRS (data is identical to Fig. 1A).**

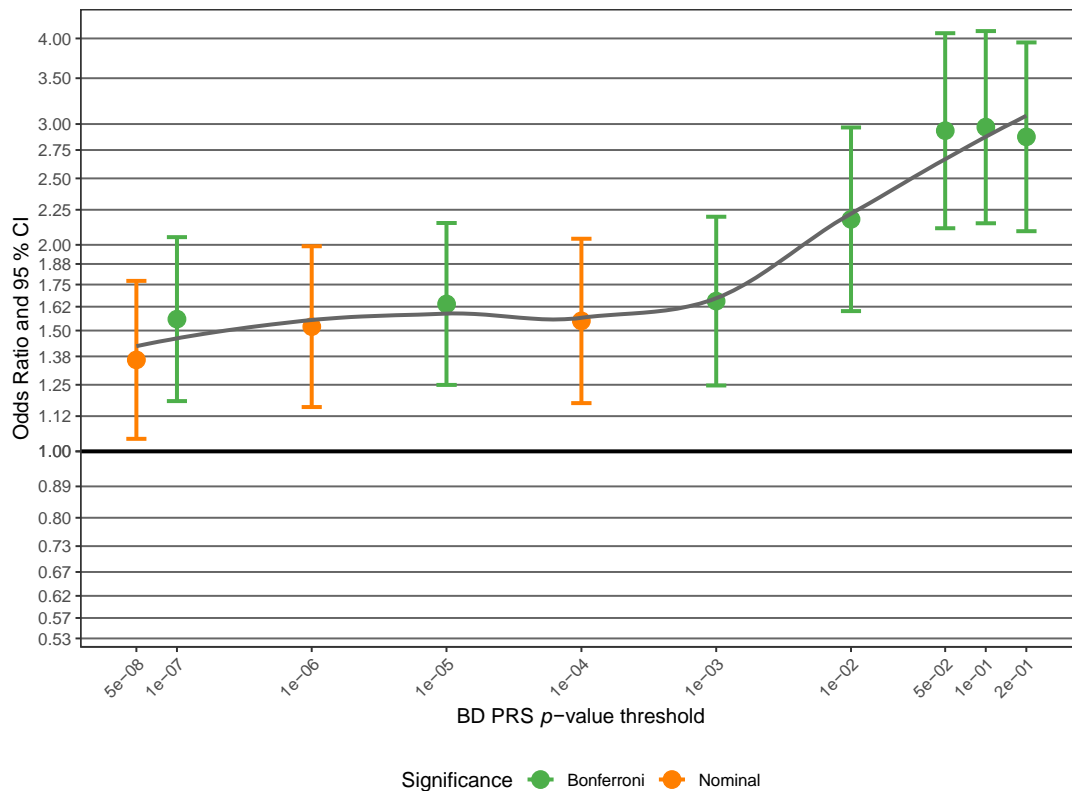

**Supplementary Fig. S2B: Association of the SCZ PRS.**

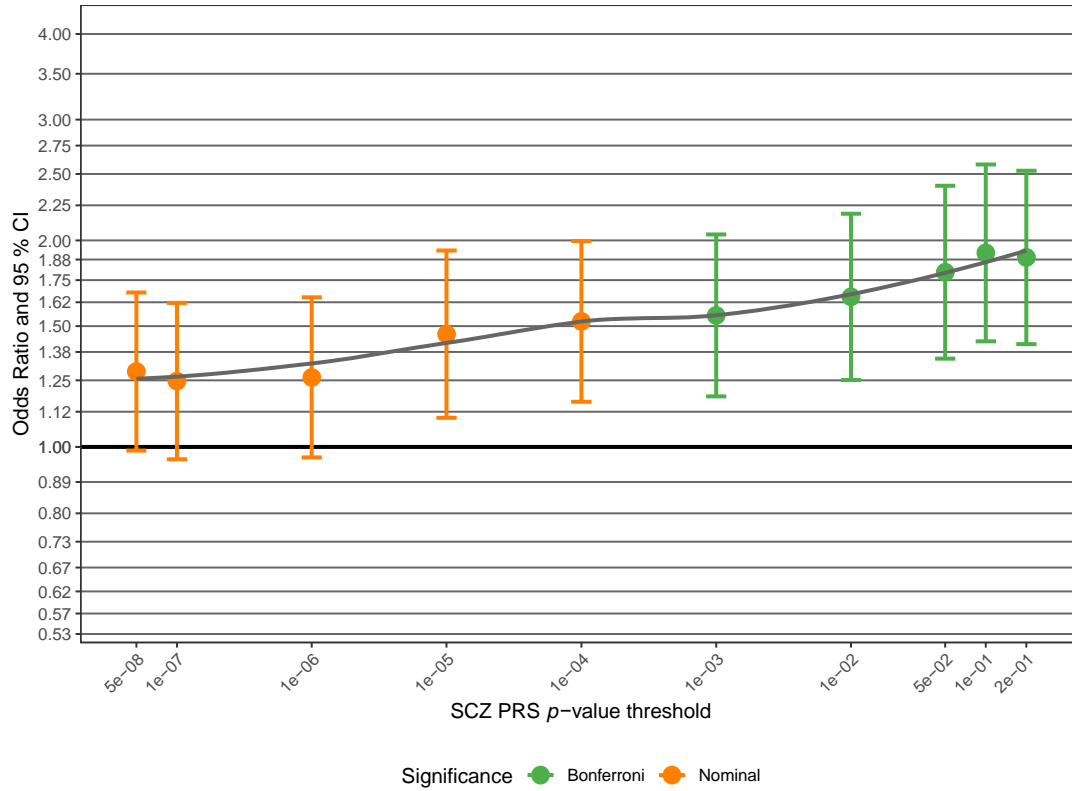

**Supplementary Fig. S2C: Association of the MDD PRS.**

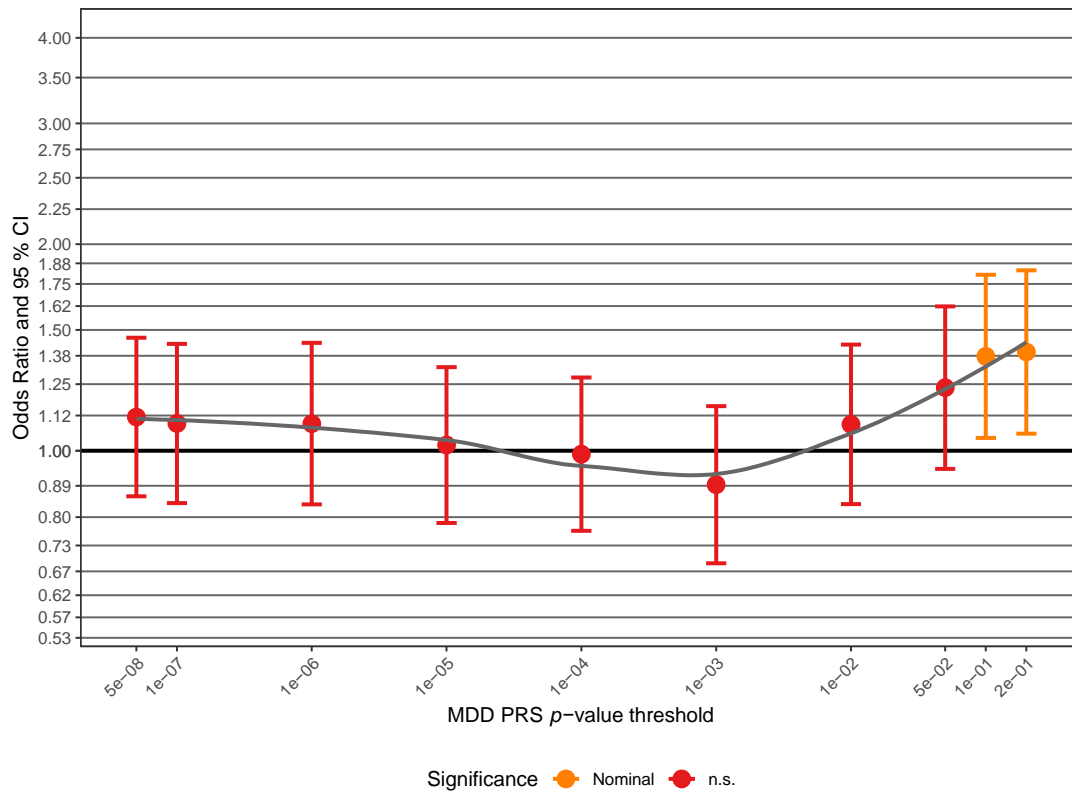

**Supplementary Fig. S2D: Association of the *Shared* PRS.**

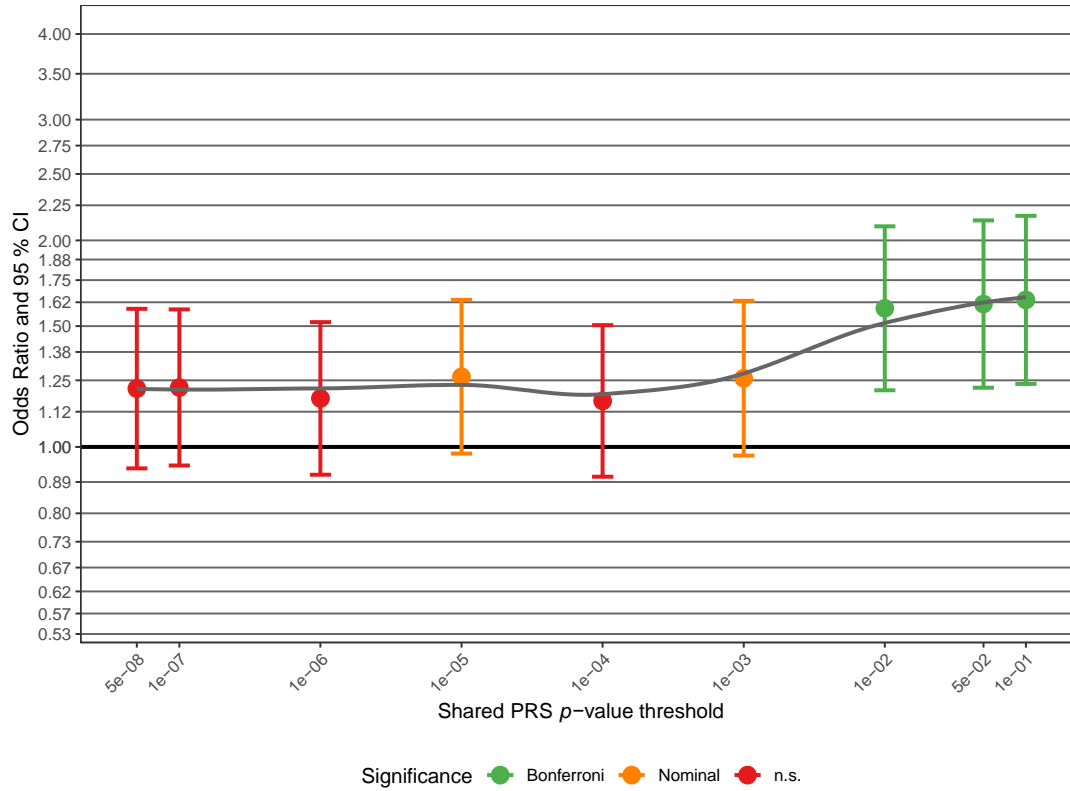

**Supplementary Fig. S2E: Association of the BD-SCZ GWIS PRS.**

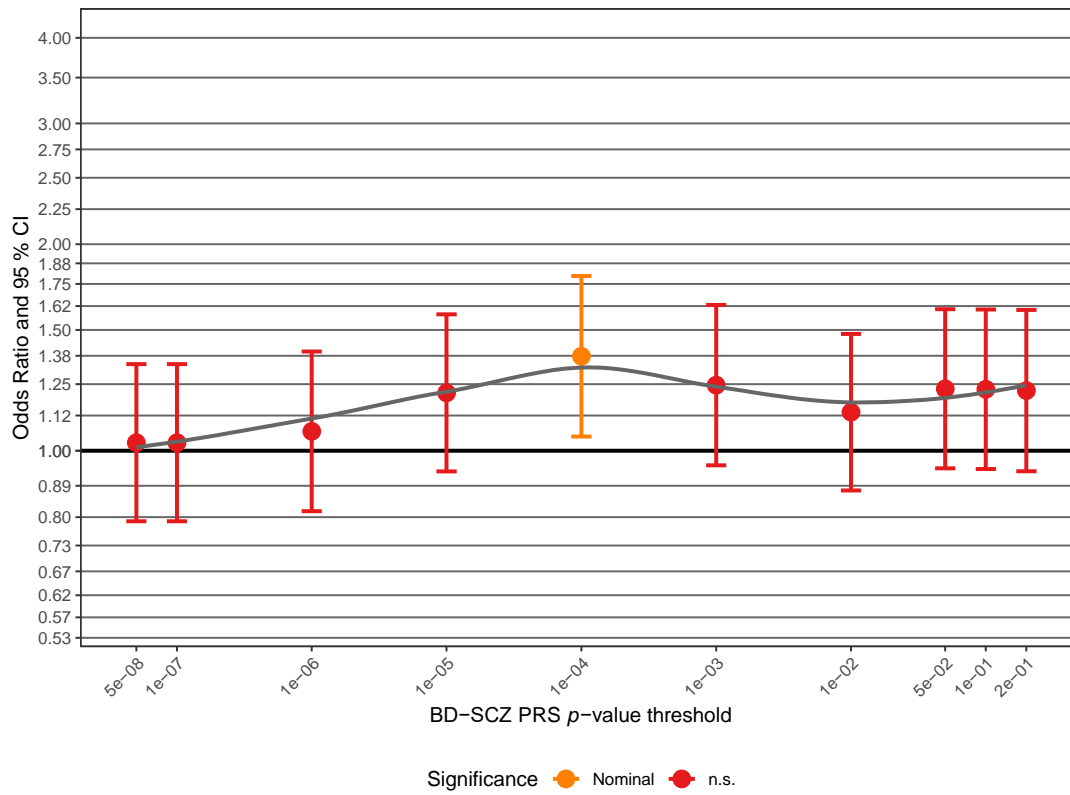

**Supplementary Fig. S2F: Association of the BD-MDD GWIS PRS.**

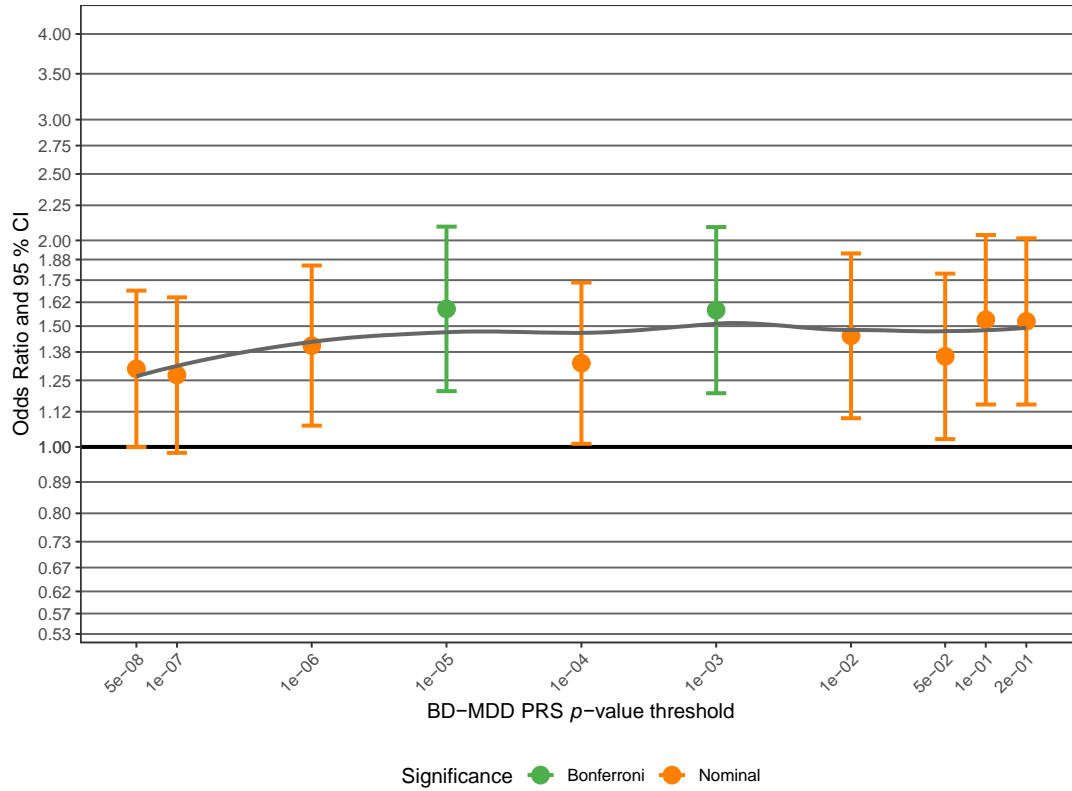

**Supplementary Fig. S2G: Association of the SCZ-BD GWIS PRS.**

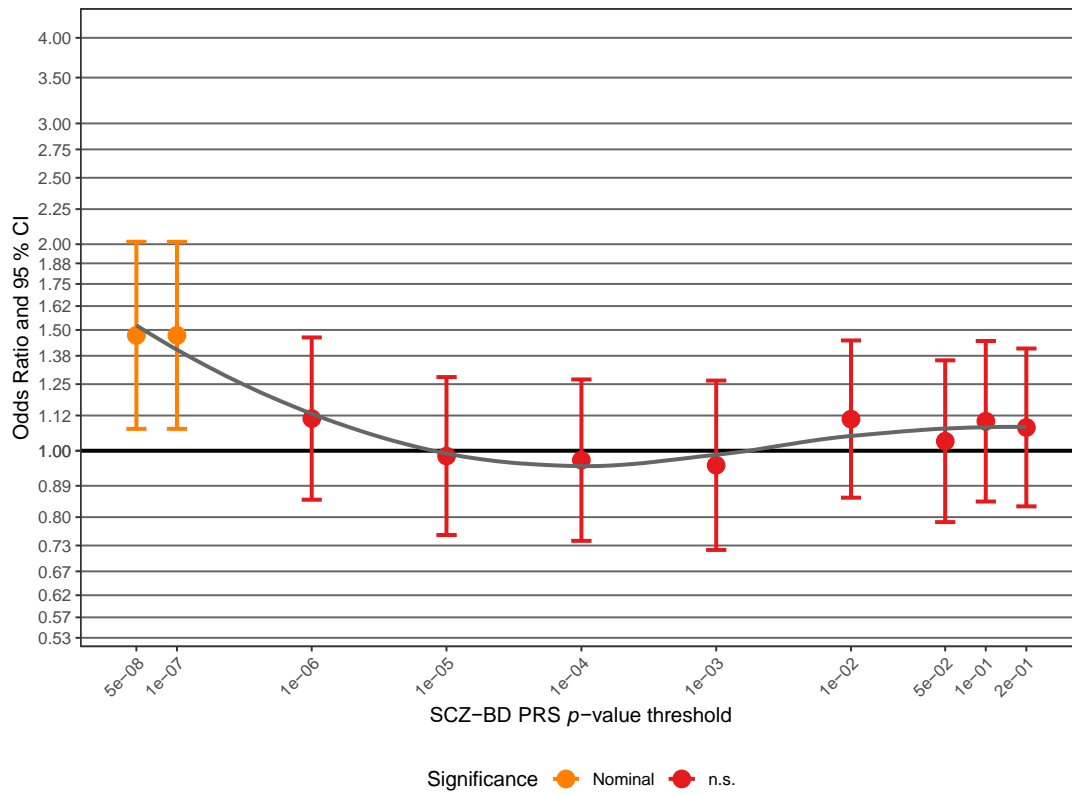



**Supplementary Fig. S2H: Association of the MDD-BD GWIS PRS.**

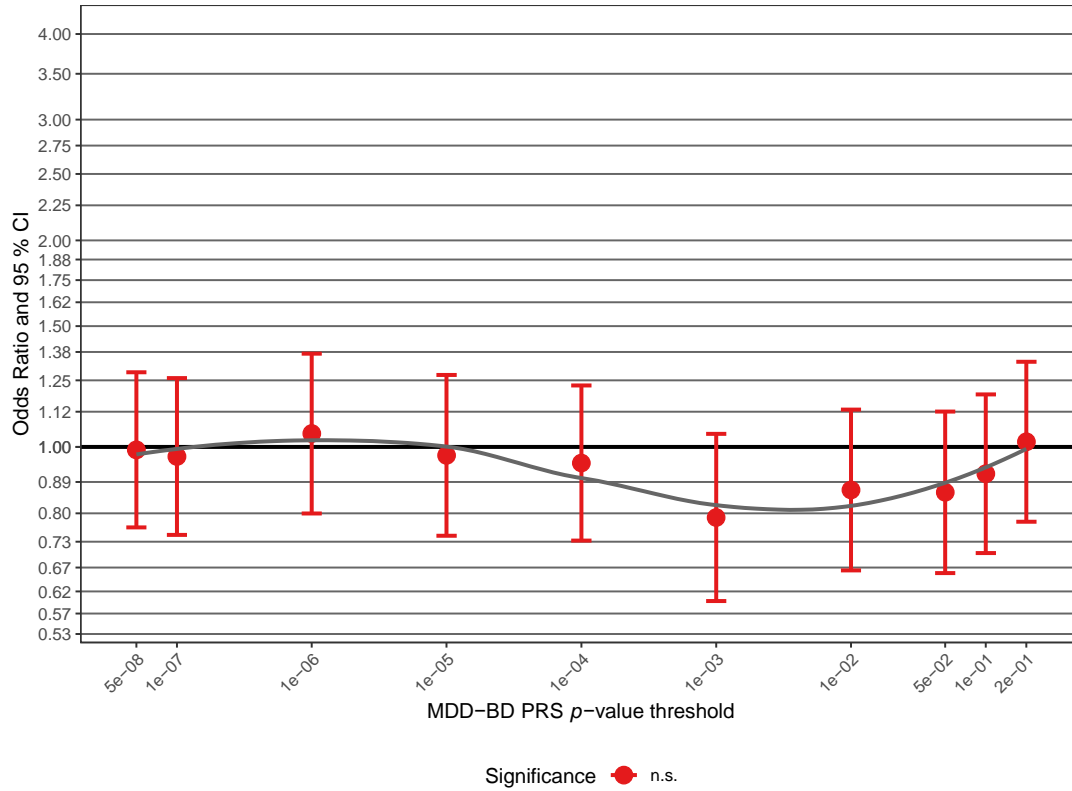

**Supplementary Fig. S2I: Association of the LOAD PRS.**

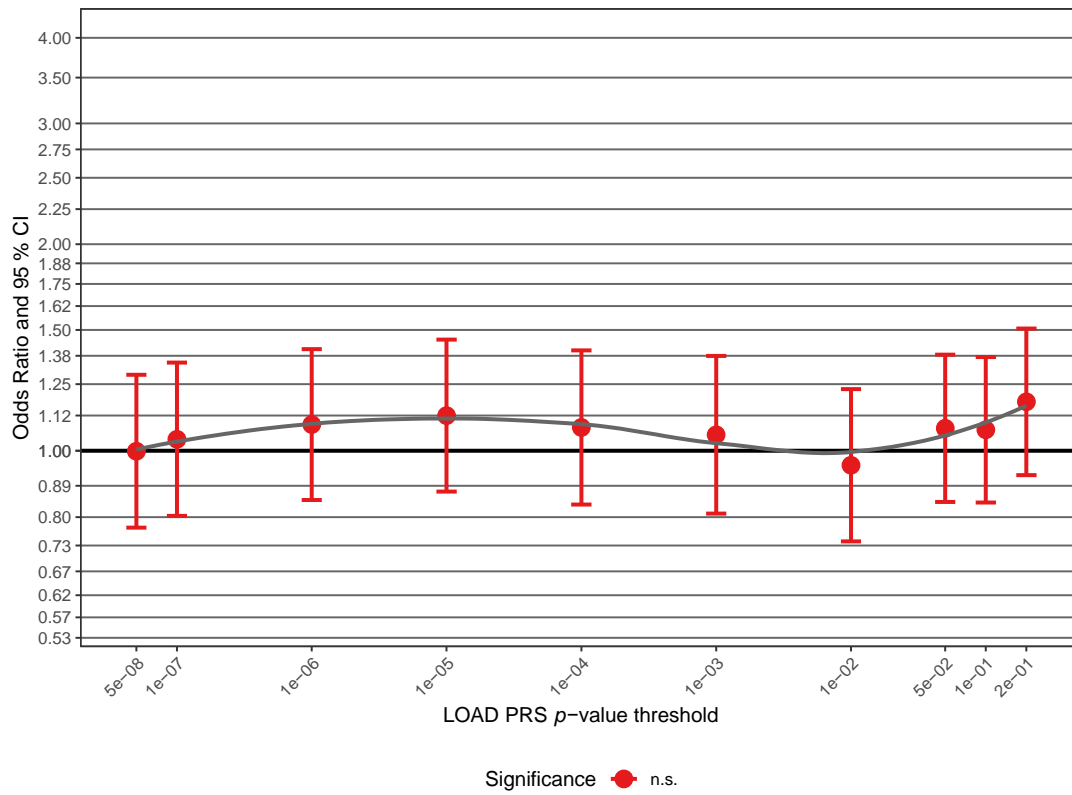

**Supplementary Fig. S3:** Association analysis comparing PRS in FAM<sub>BD</sub> cases and unrelated CC<sub>BD</sub> cases. Further details of the plots are given in the legend for Fig. 1. Full association test statistics including *p*-values are shown in Supplementary Table S4.  
**Supplementary Fig. S3A:** Association of the BD PRS (data is identical to Fig. 1C).

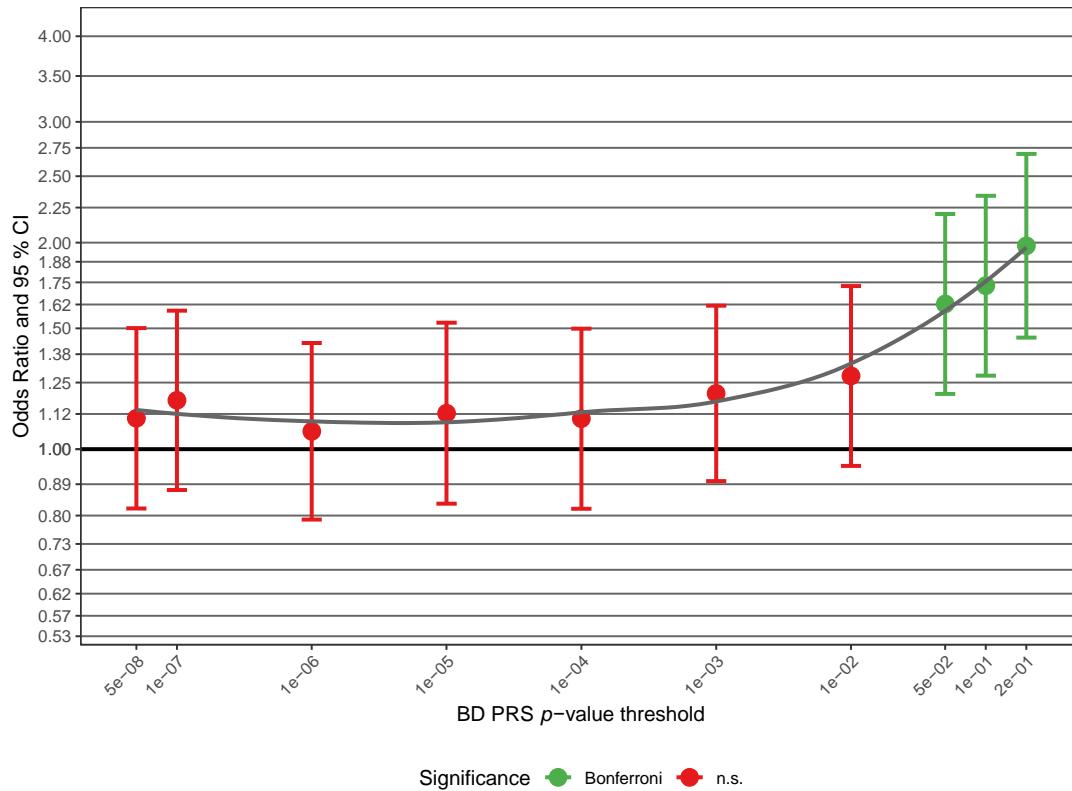

**Supplementary Fig. S3B:** Association of the SCZ PRS.

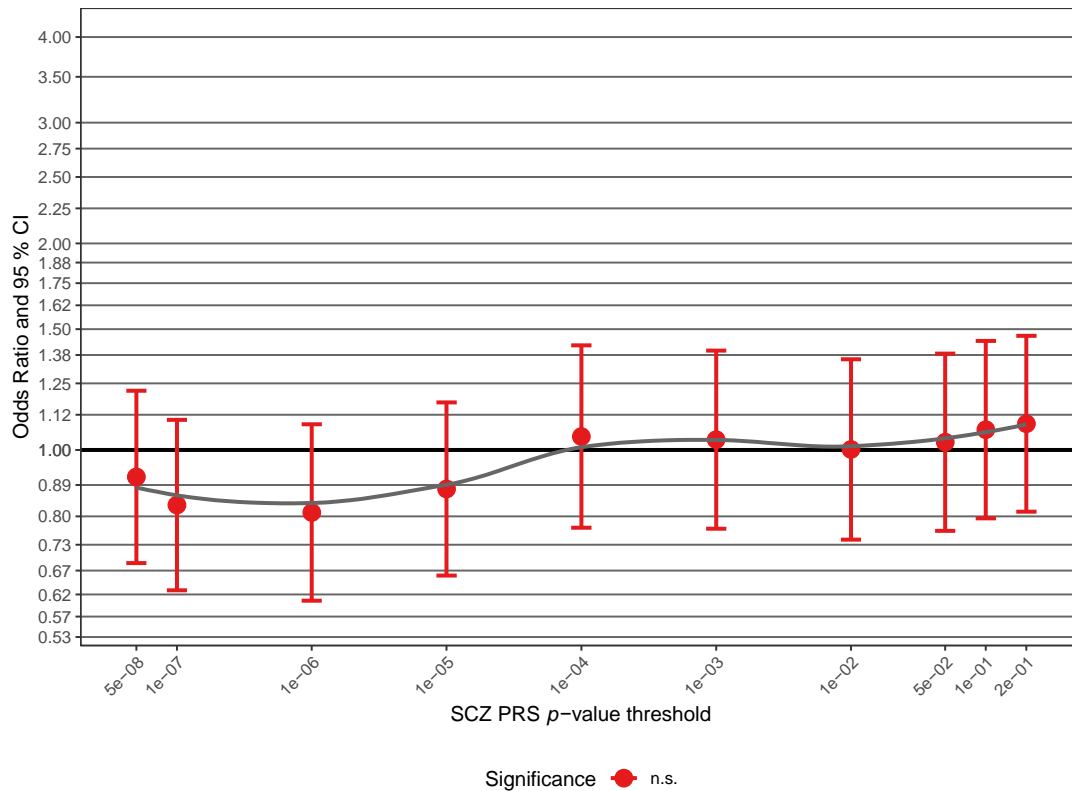

**Supplementary Fig. S3C: Association of the MDD PRS.**

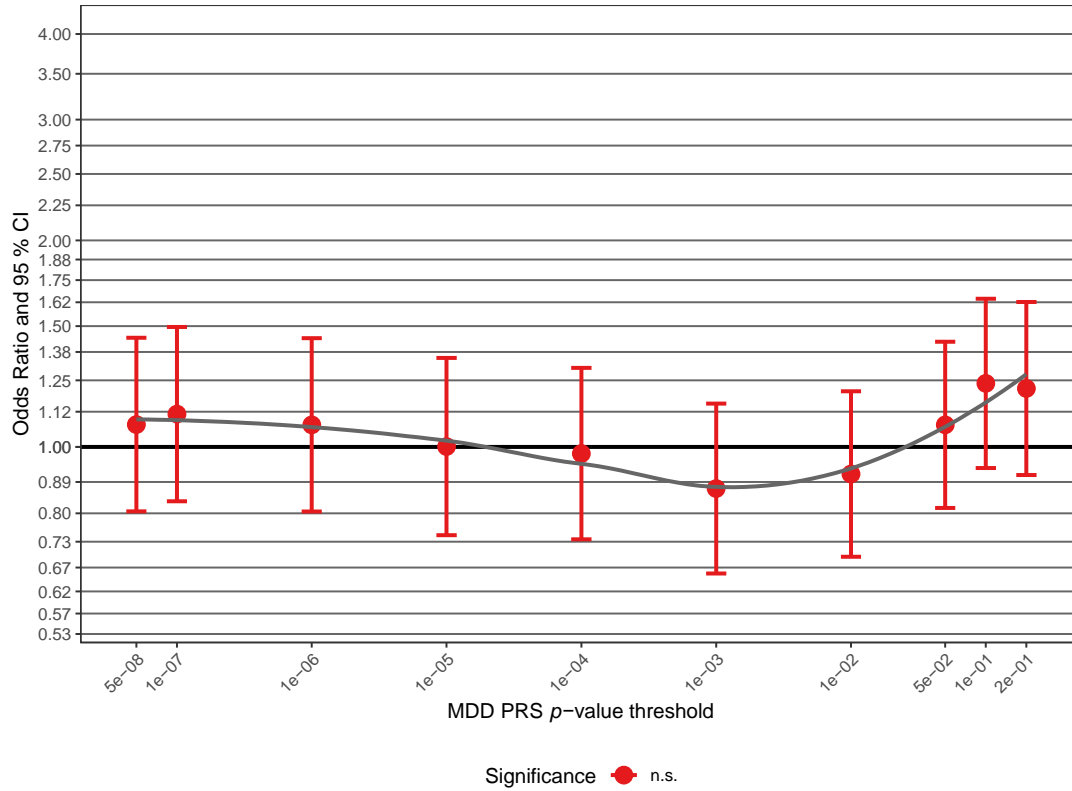

**Supplementary Fig. S3D: Association of the Shared PRS.**

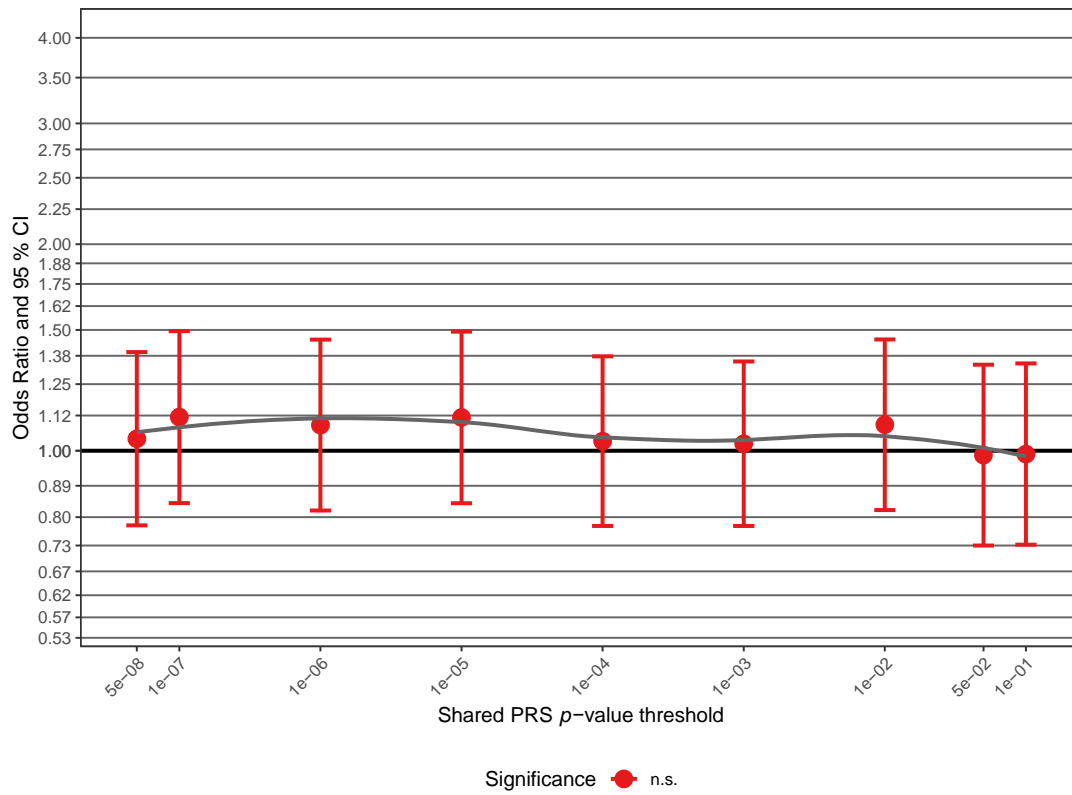

**Supplementary Fig. S3E: Association of the BD-SCZ GWIS PRS.**

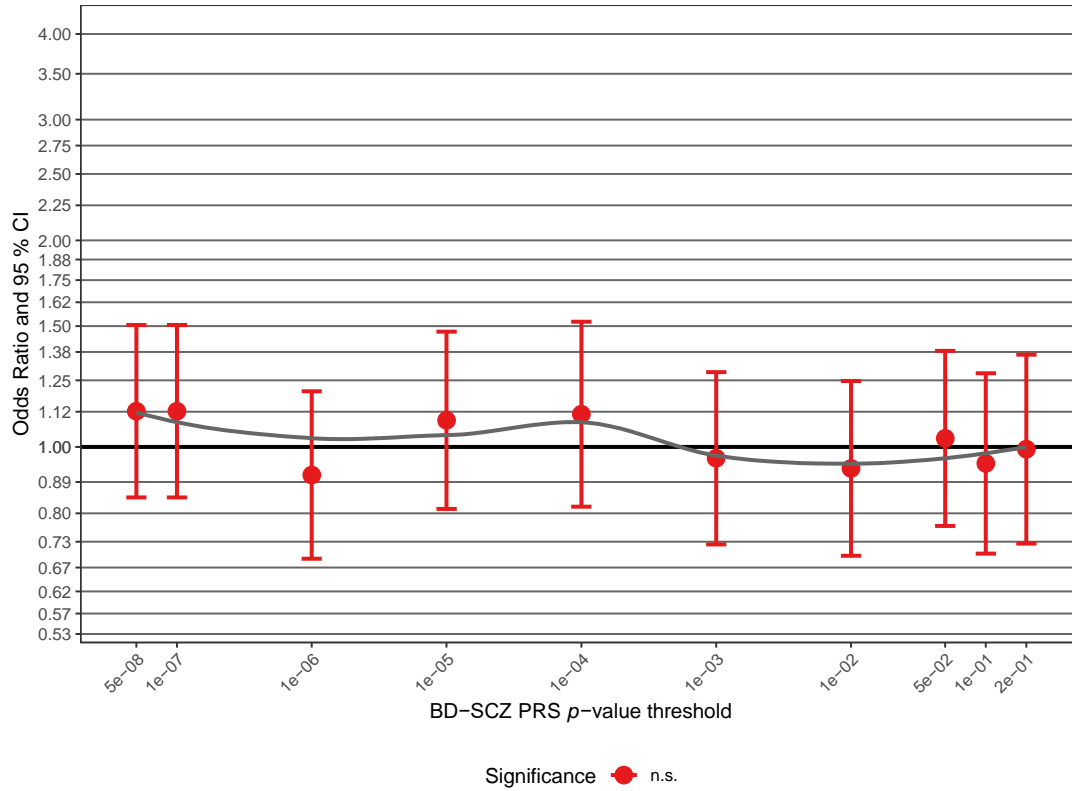

**Supplementary Fig. S3F: Association of the BD-MDD GWIS PRS.**

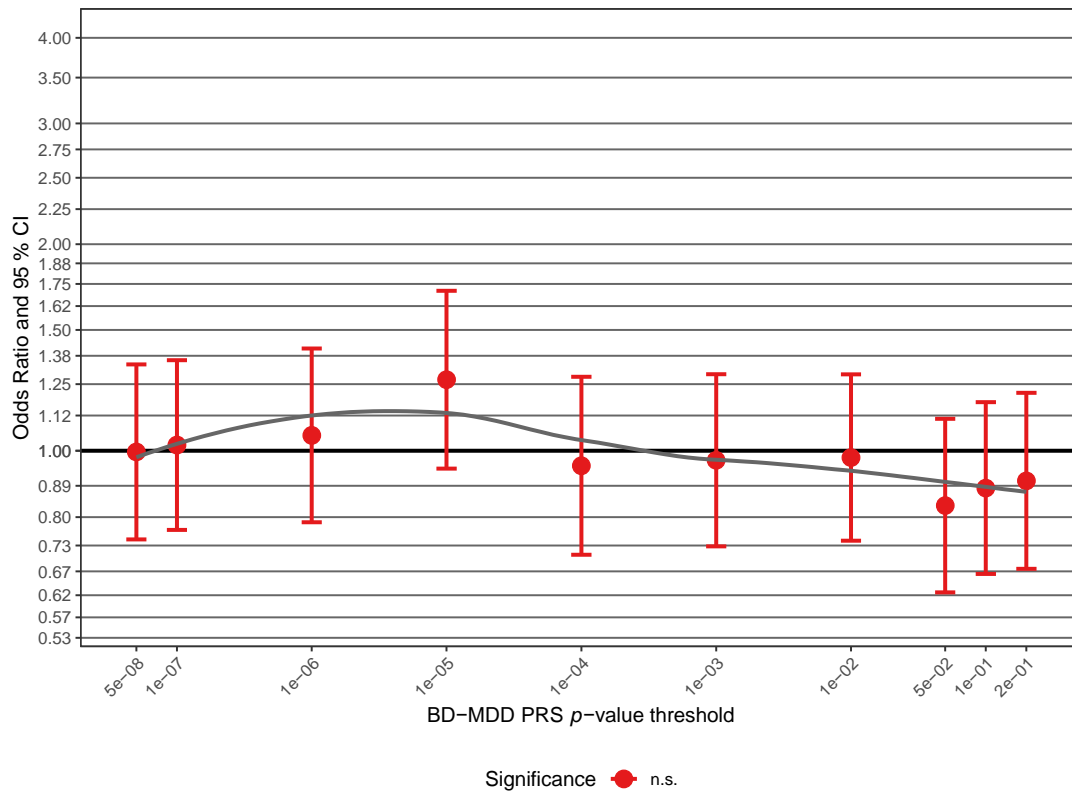

**Supplementary Fig. S3G: Association of the SCZ-BD GWIS PRS.**

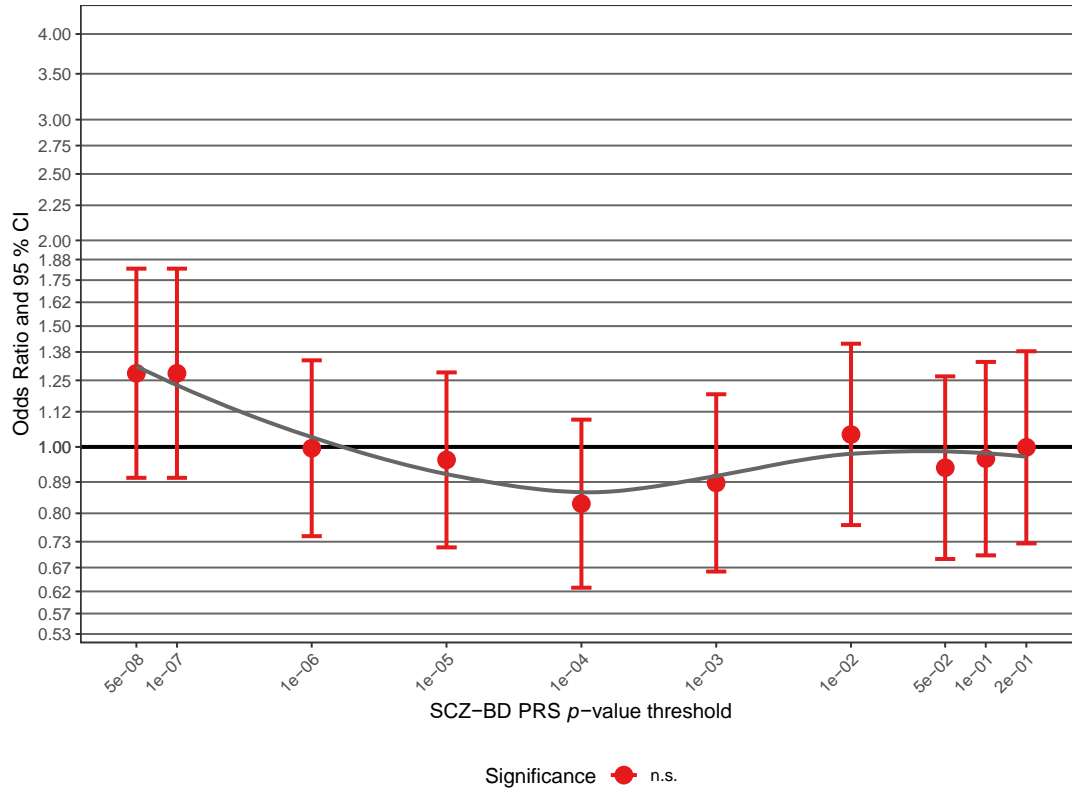

**Supplementary Fig. S3H: Association of the MDD-BD GWIS PRS.**

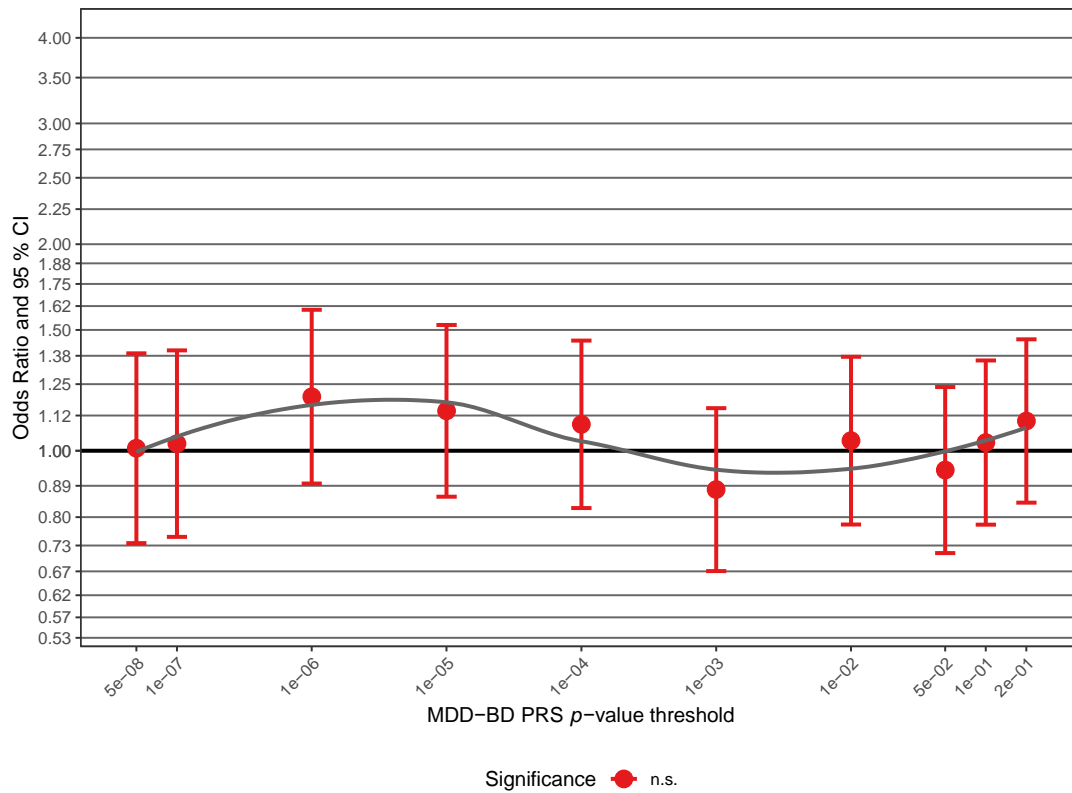

**Supplementary Fig. S3I:** Association of the LOAD PRS.

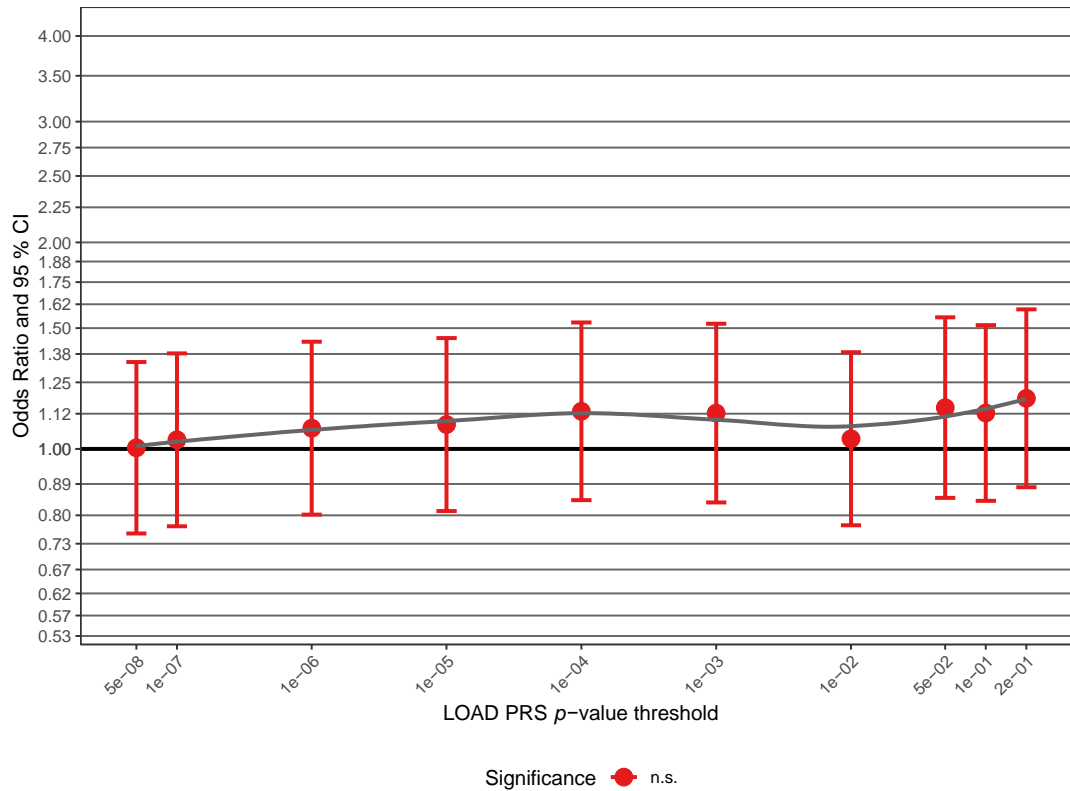

**Supplementary Fig. S4:** Association analysis comparing PRS in  $FAM_{unaffected}$  and  $CC_{controls}$ . Further details of the plots are described in the legend for Fig. 1. Full association test statistics including  $p$ -values are shown in Supplementary Table S5.  
**Supplementary Fig. S4A:** Association of the BD PRS (data is identical to Fig. 1E).

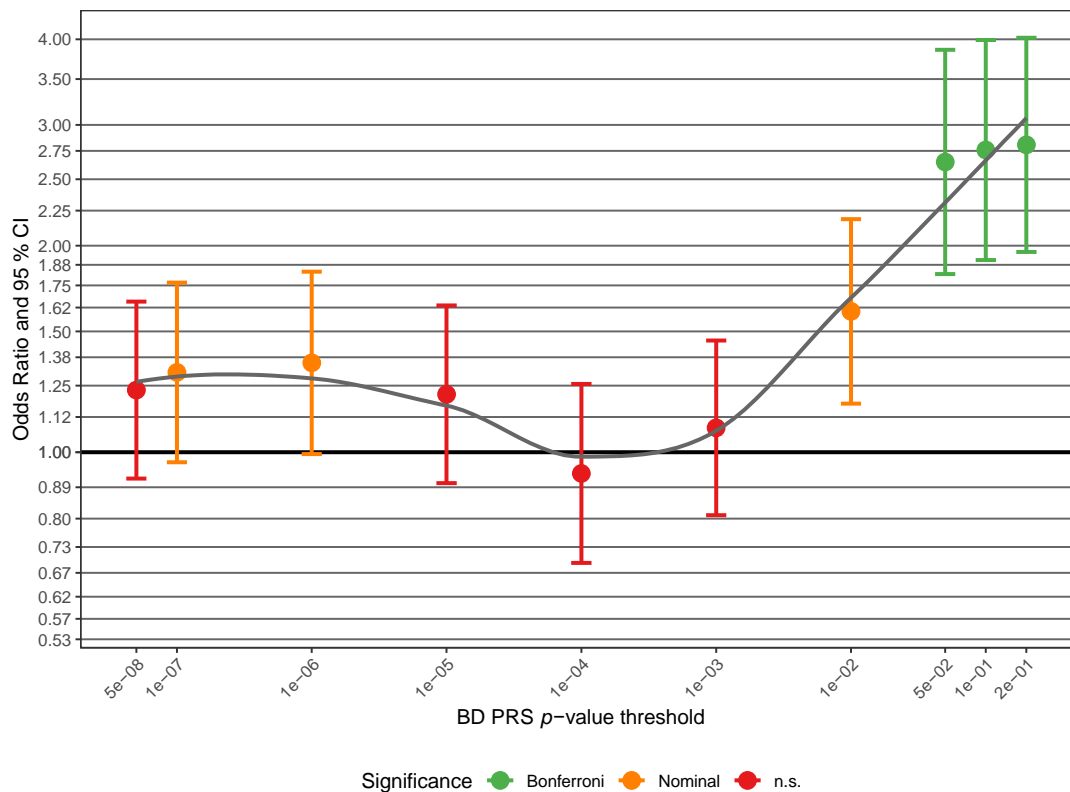

**Supplementary Fig. S4B: Association of the SCZ PRS.**

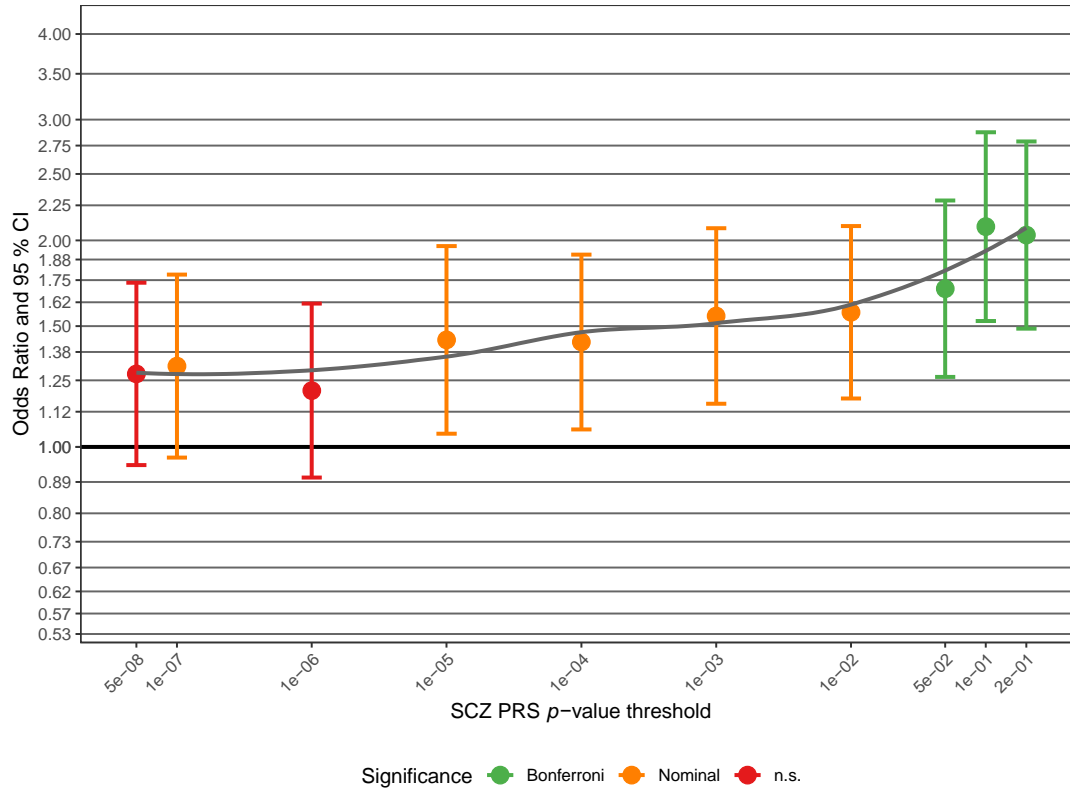

**Supplementary Fig. S4C: Association of the MDD PRS.**

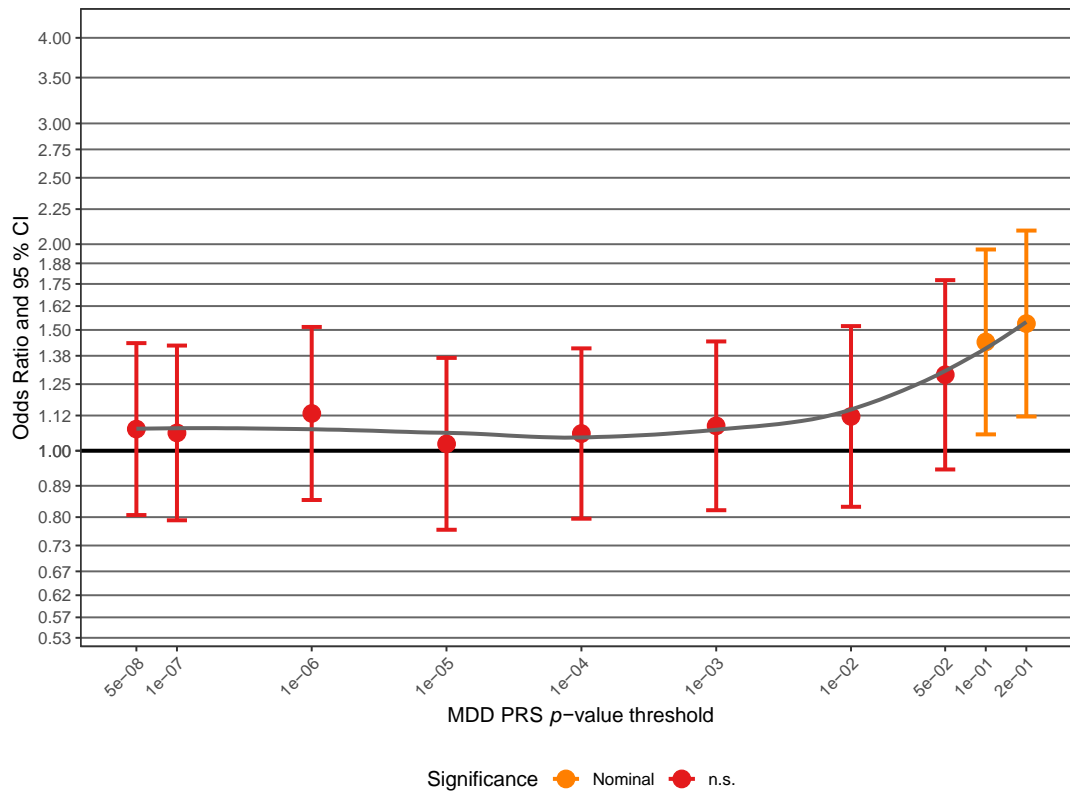

**Supplementary Fig. S4D: Association of the *Shared* PRS.**

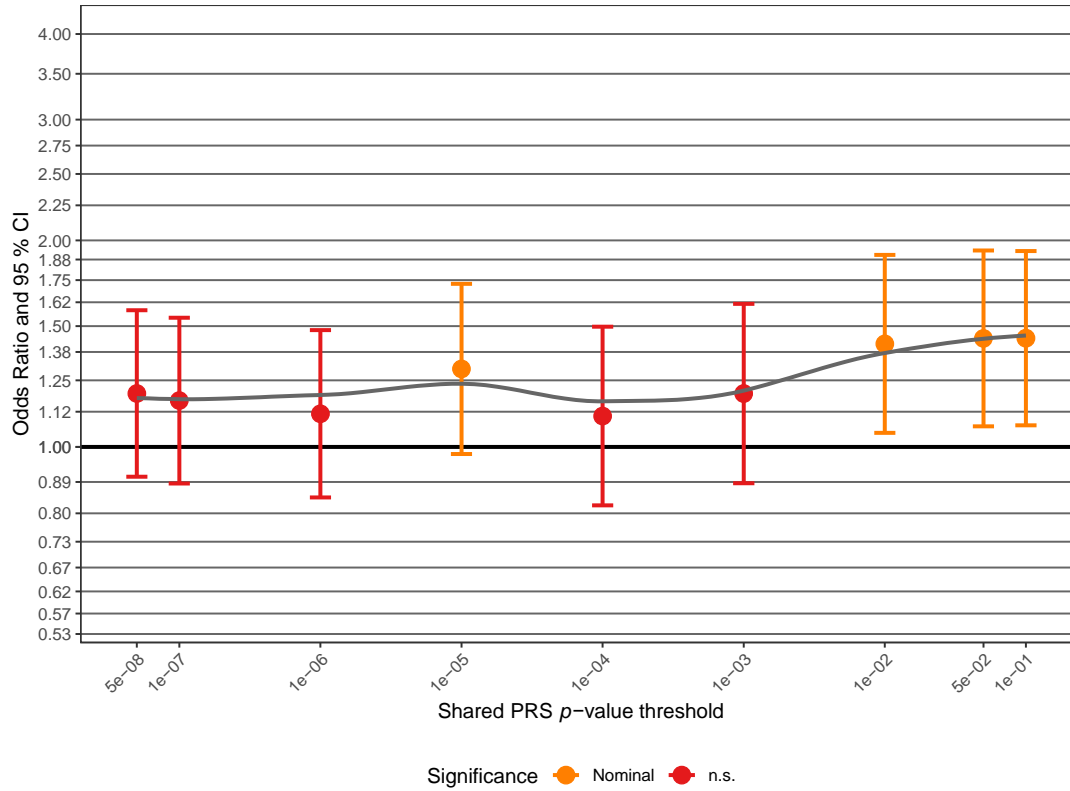

**Supplementary Fig. S4E: Association of the BD-SCZ GWIS PRS.**

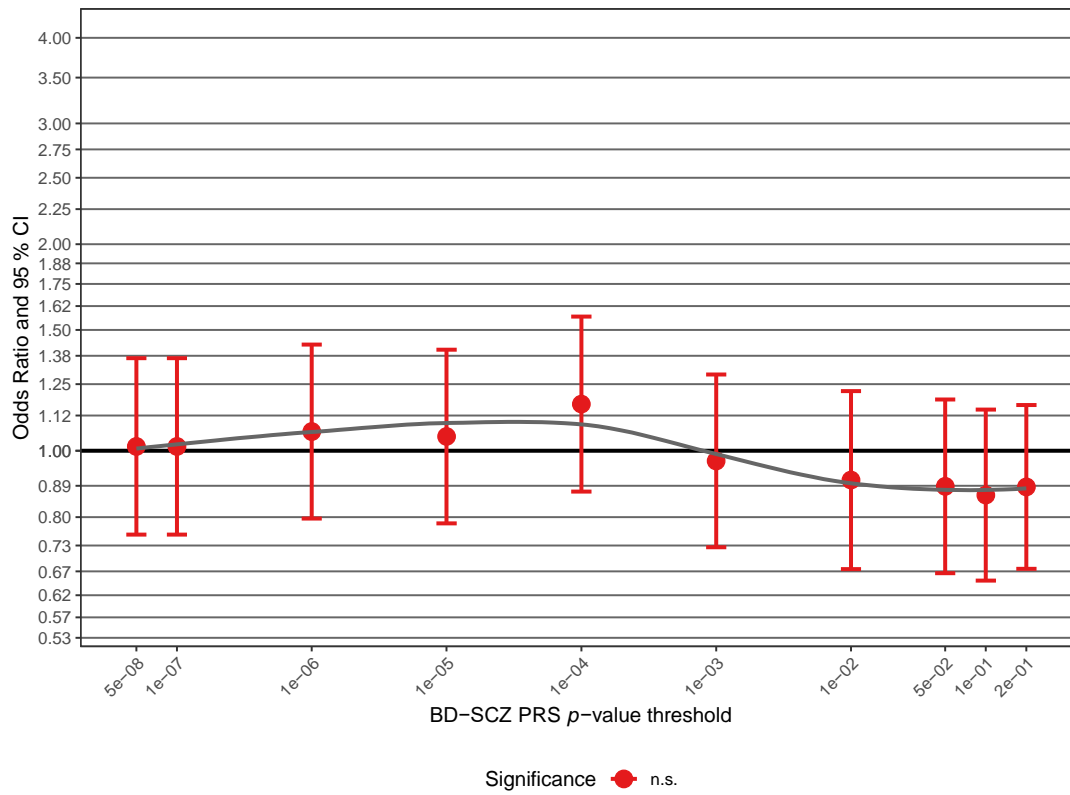



**Supplementary Fig. S4F: Association of the BD-MDD GWIS PRS.**

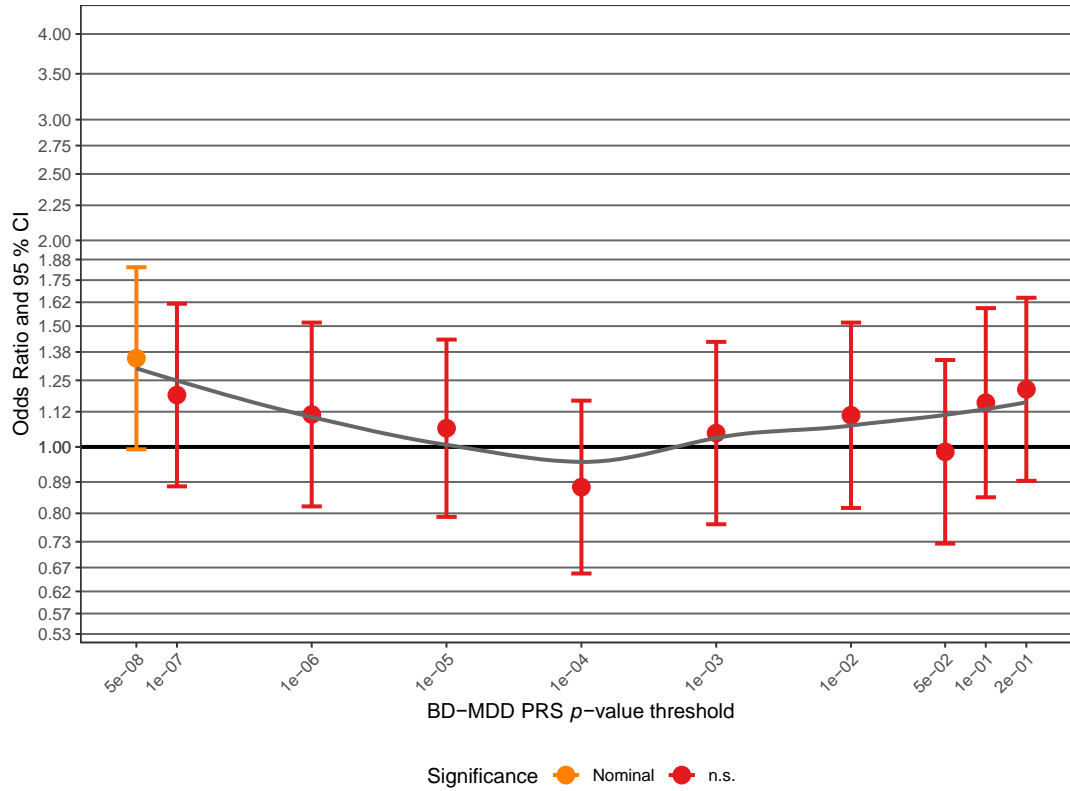

**Supplementary Fig. S4G: Association of the SCZ-BD GWIS PRS.**

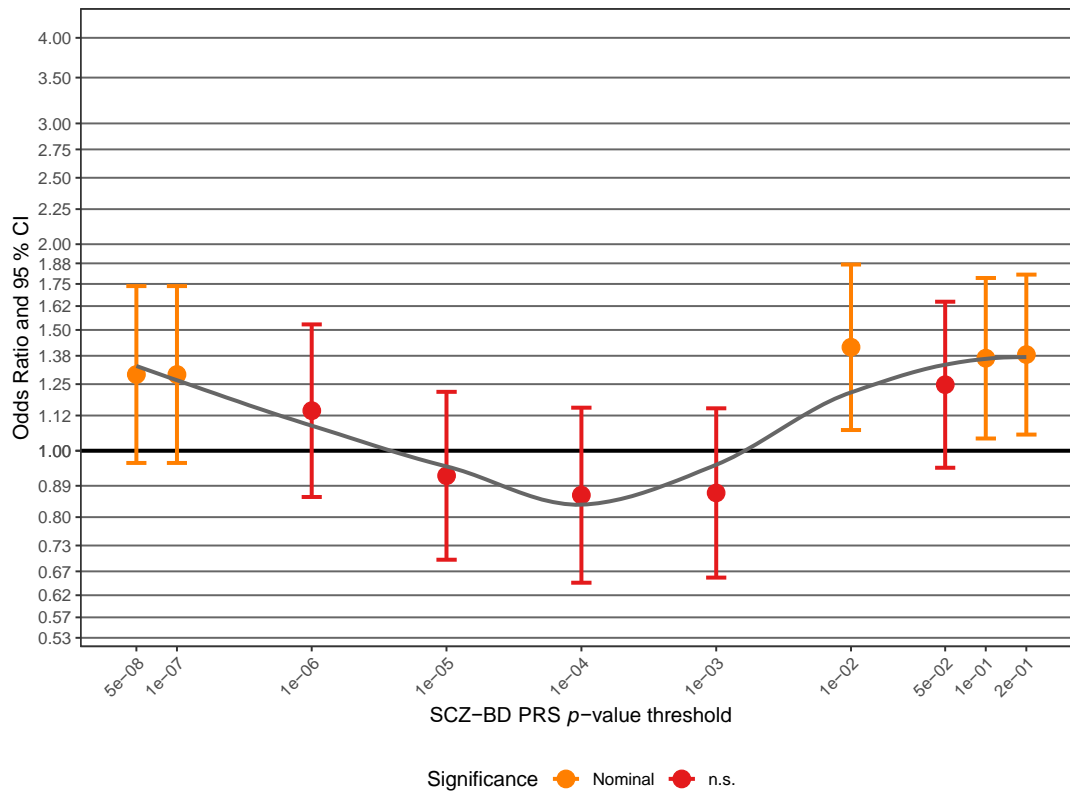

**Supplementary Fig. S4H: Association of the MDD-BD GWIS PRS.**

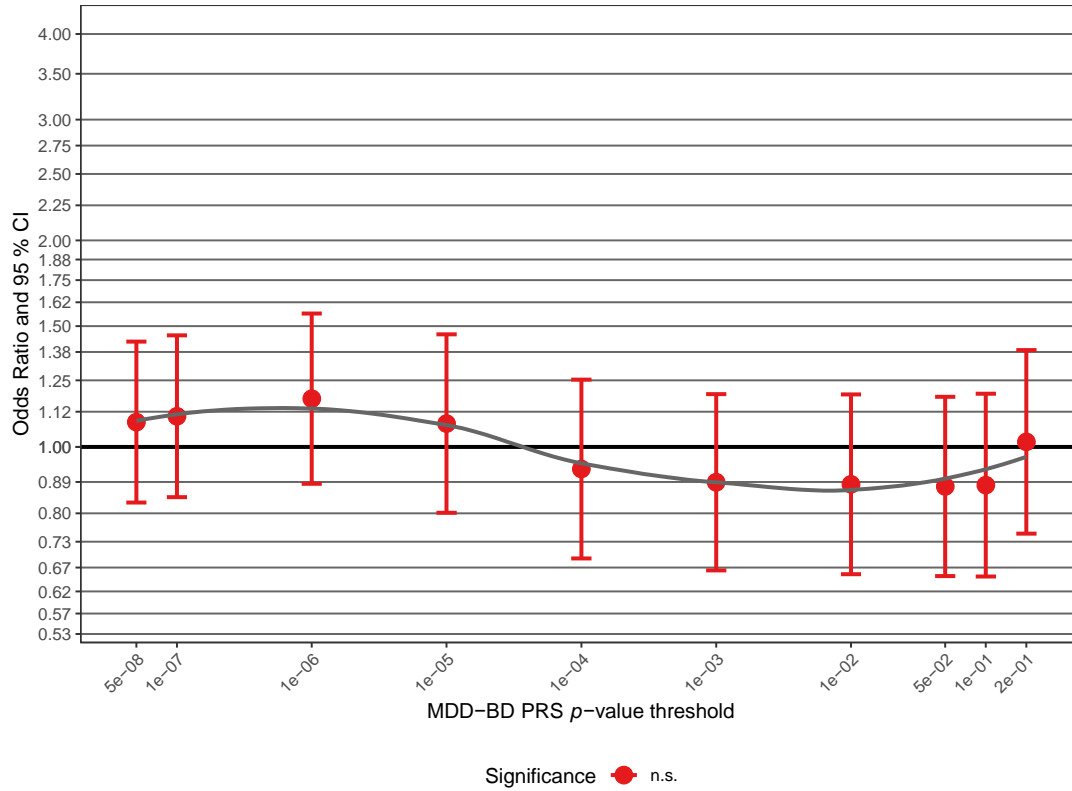

**Supplementary Fig. S4I: Association of the LOAD PRS.**

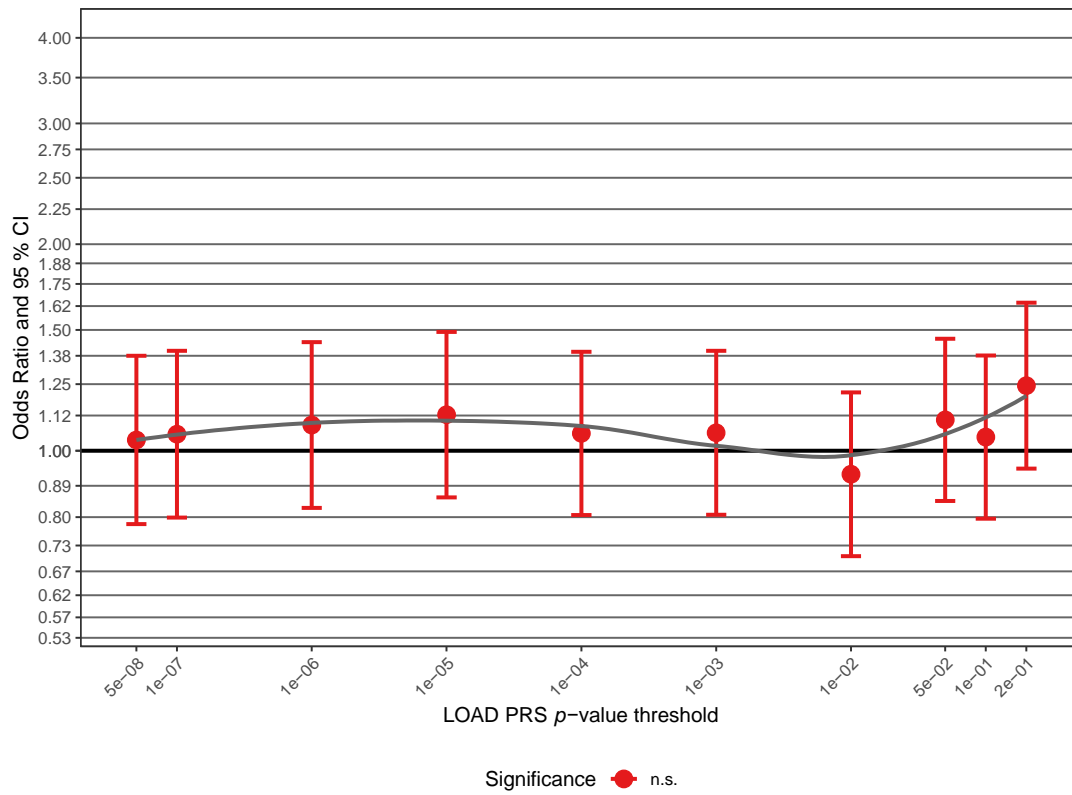

**Supplementary Fig. S5:** Association analysis comparing PRS in FAM<sub>BD</sub> cases and FAM<sub>unaffected</sub>. Further details of the plots are given in the legends for Figs. 1 and 2. Full association test statistics including *p*-values are shown in Supplementary Table S6.  
**Supplementary Fig. S5A:** Association of the BD PRS (data is identical to Fig. 2A).

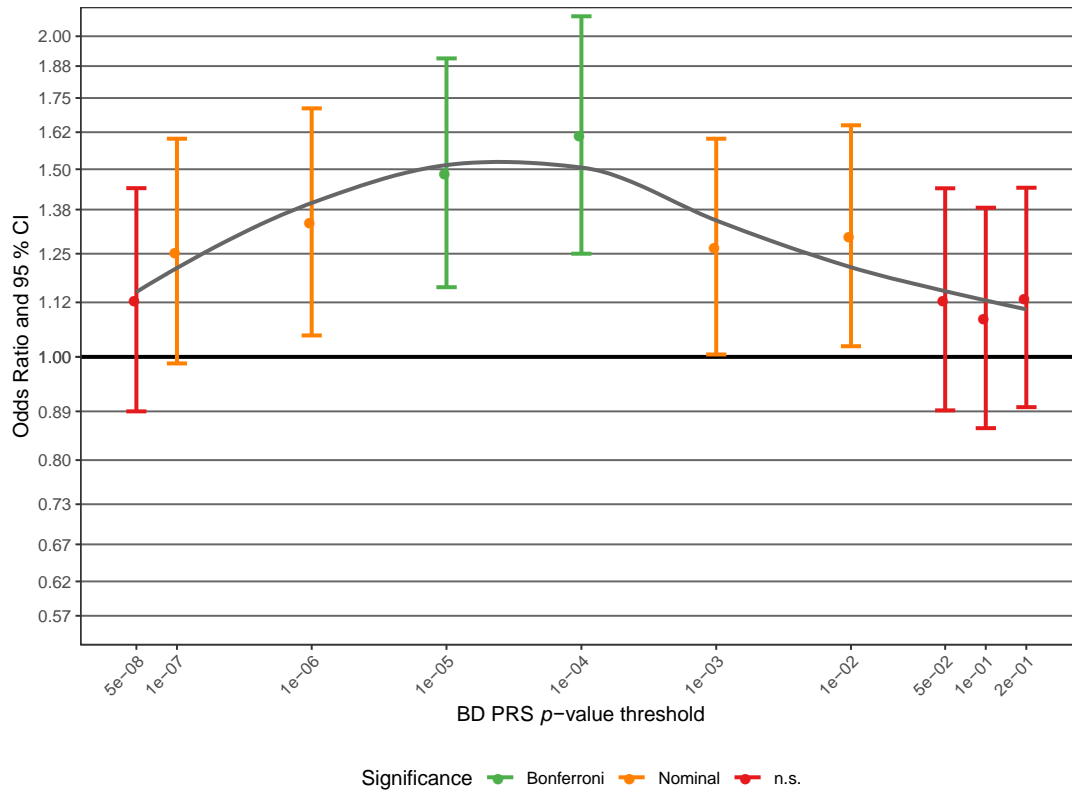

**Supplementary Fig. S5B:** Association of the SCZ PRS.

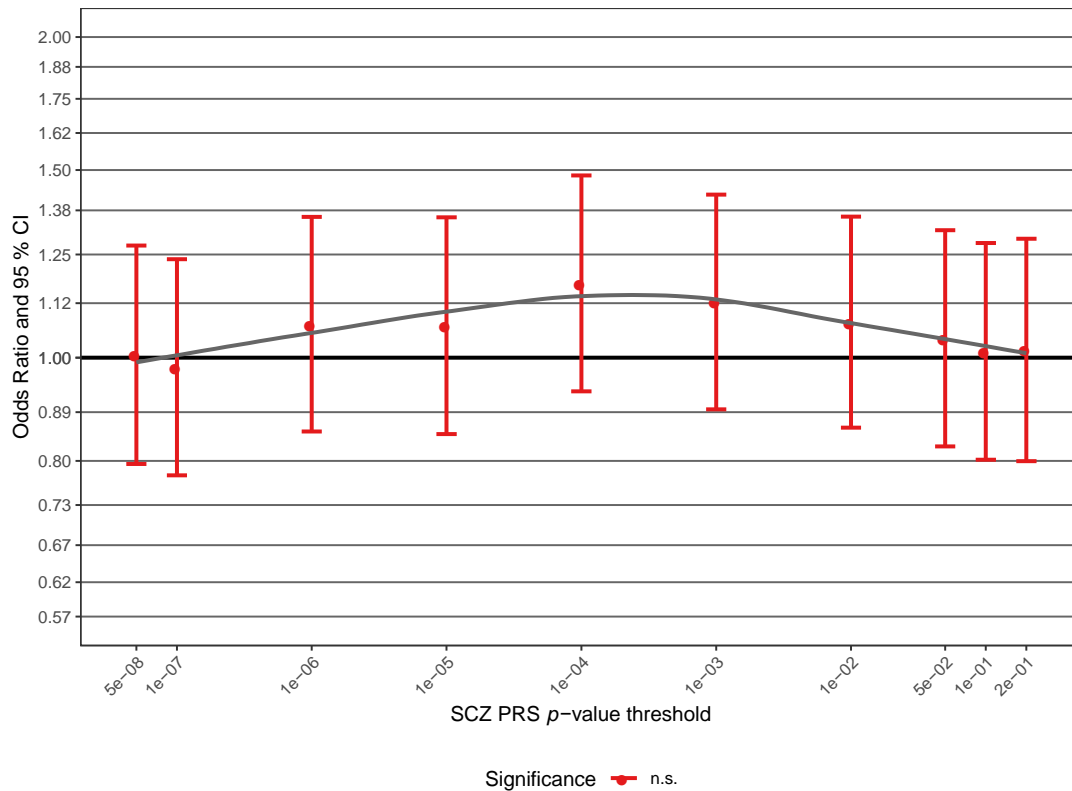

**Supplementary Fig. S5C: Association of the MDD PRS.**

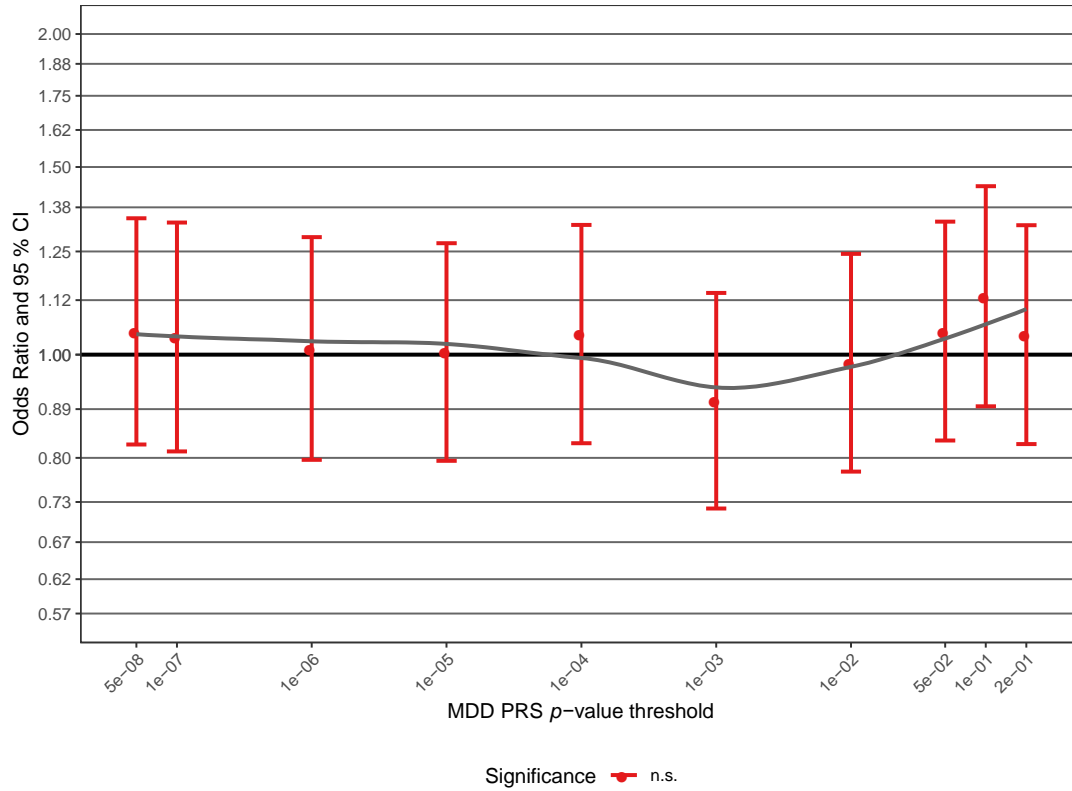

**Supplementary Fig. S5D: Association of the Shared PRS.**

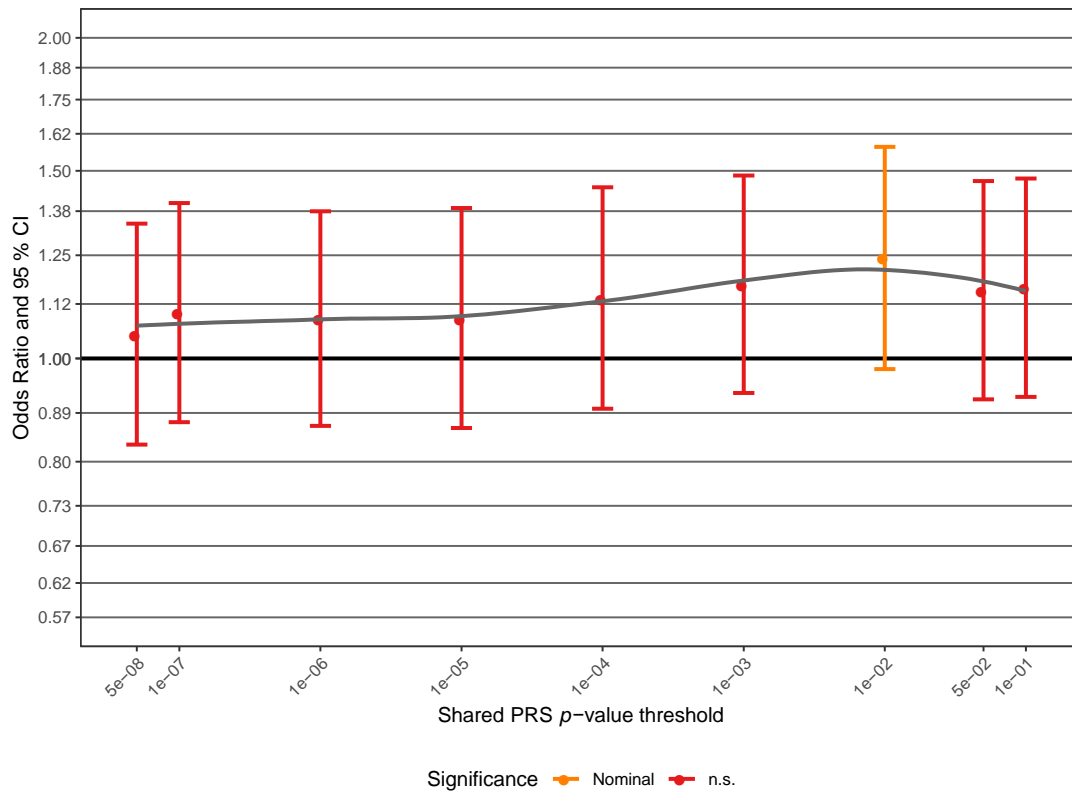

**Supplementary Fig. S5E: Association of the BD-SCZ GWIS PRS.**

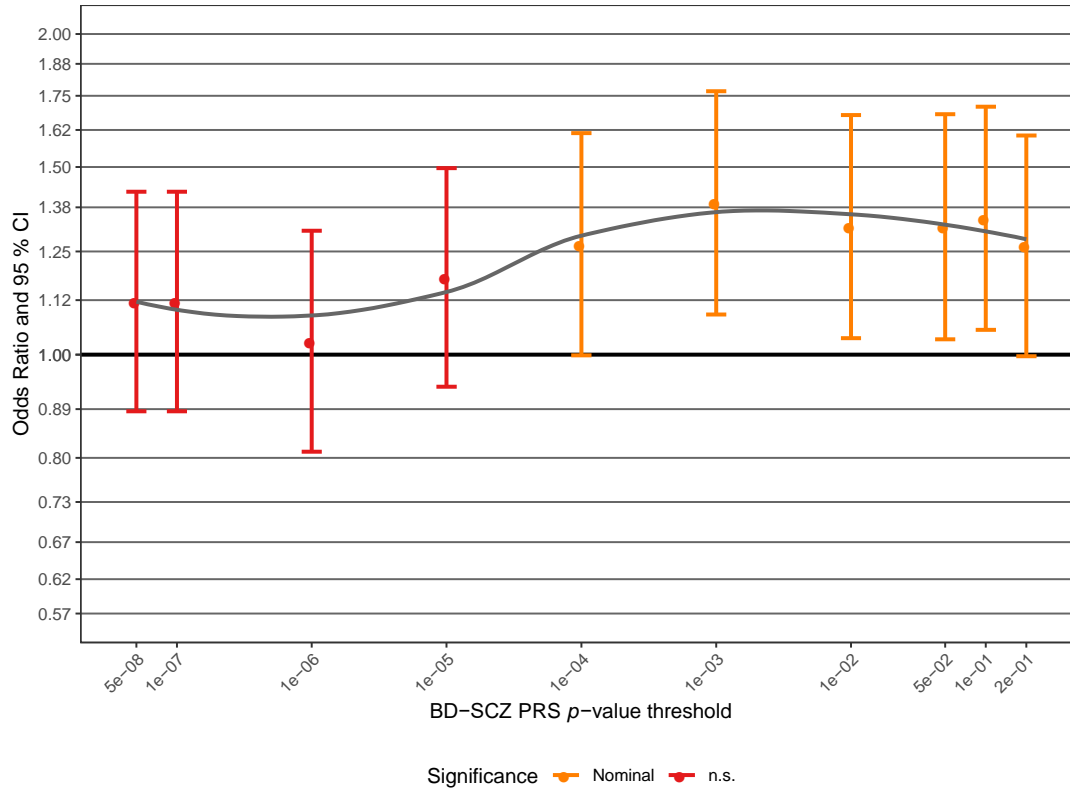

**Supplementary Fig. S5F: Association of the BD-MDD GWIS PRS.**

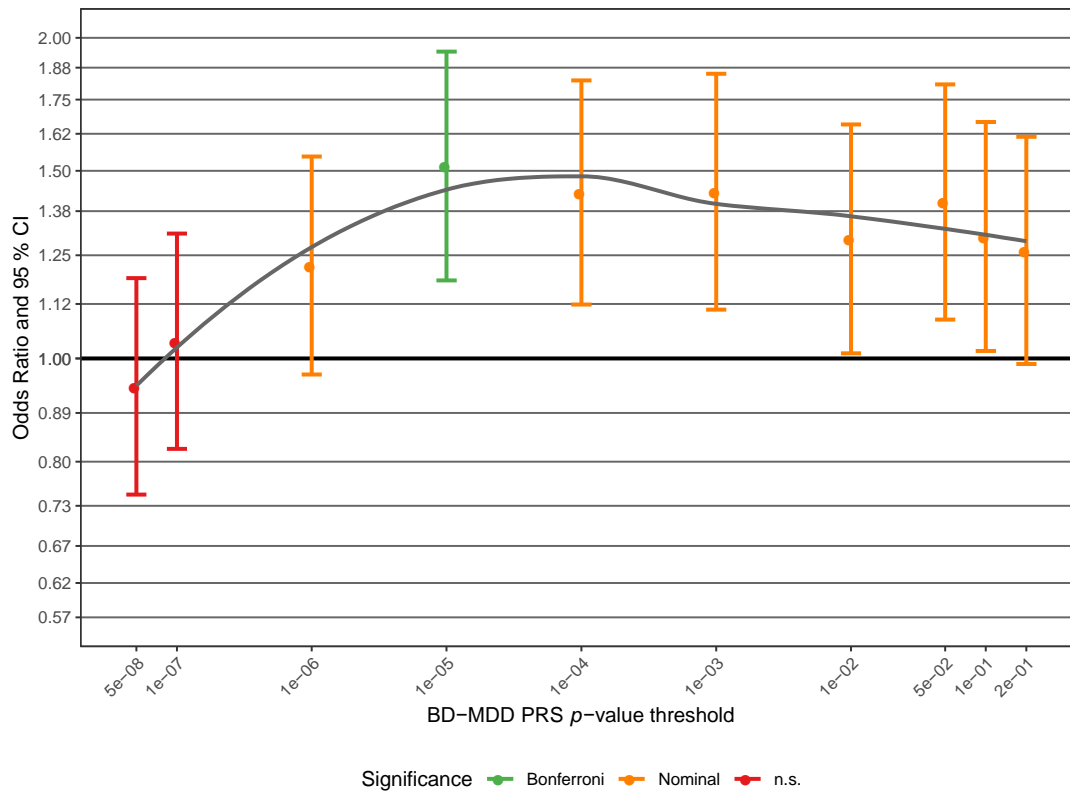

**Supplementary Fig. S5G: Association of the SCZ-BD GWIS PRS.**

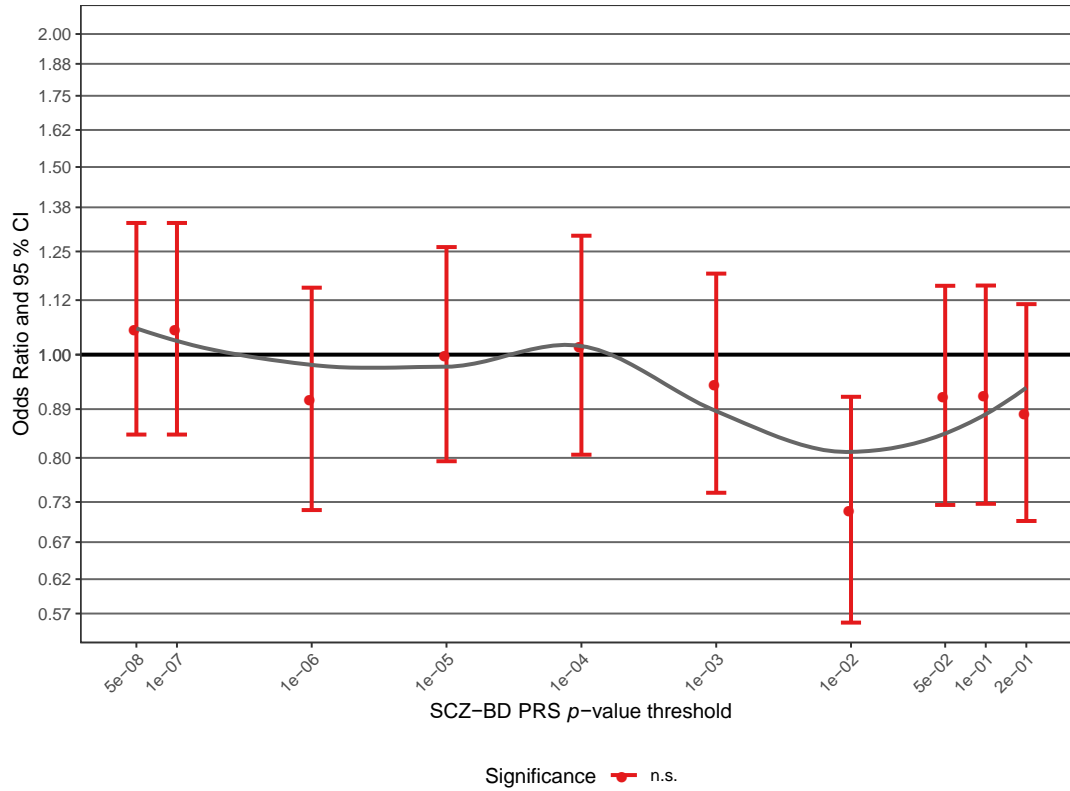

**Supplementary Fig. S5H: Association of the MDD-BD GWIS PRS.**

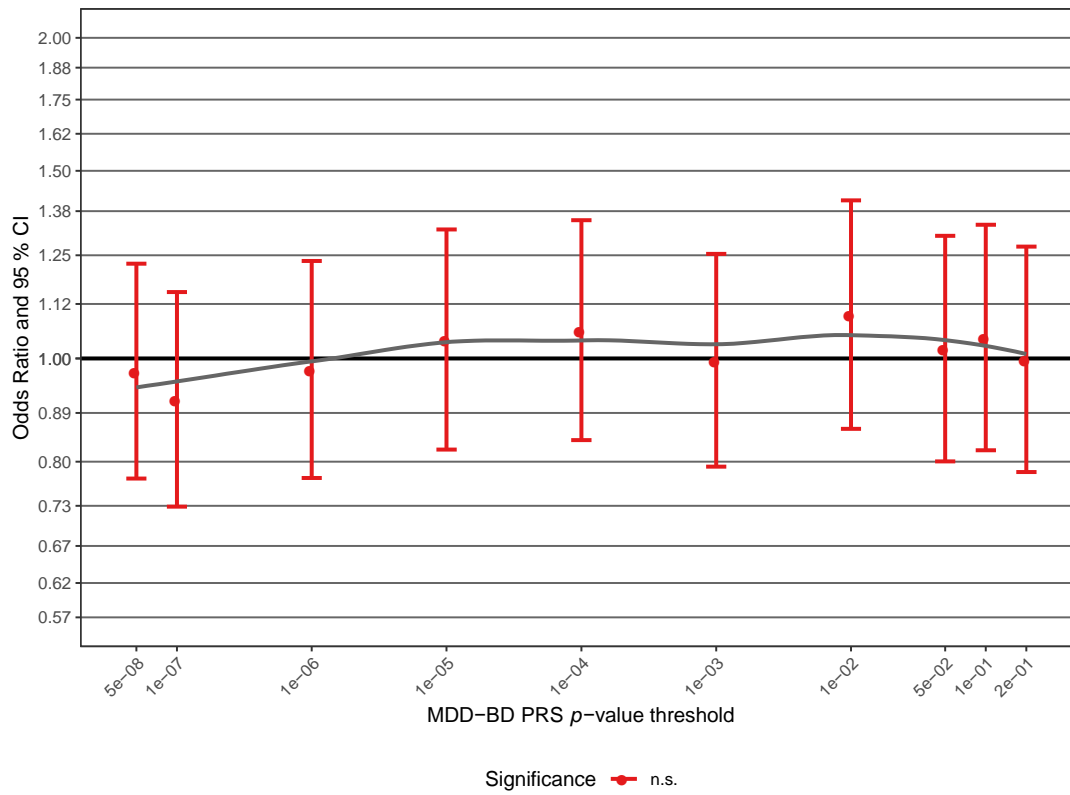

**Supplementary Fig. S5I: Association of the LOAD PRS.**

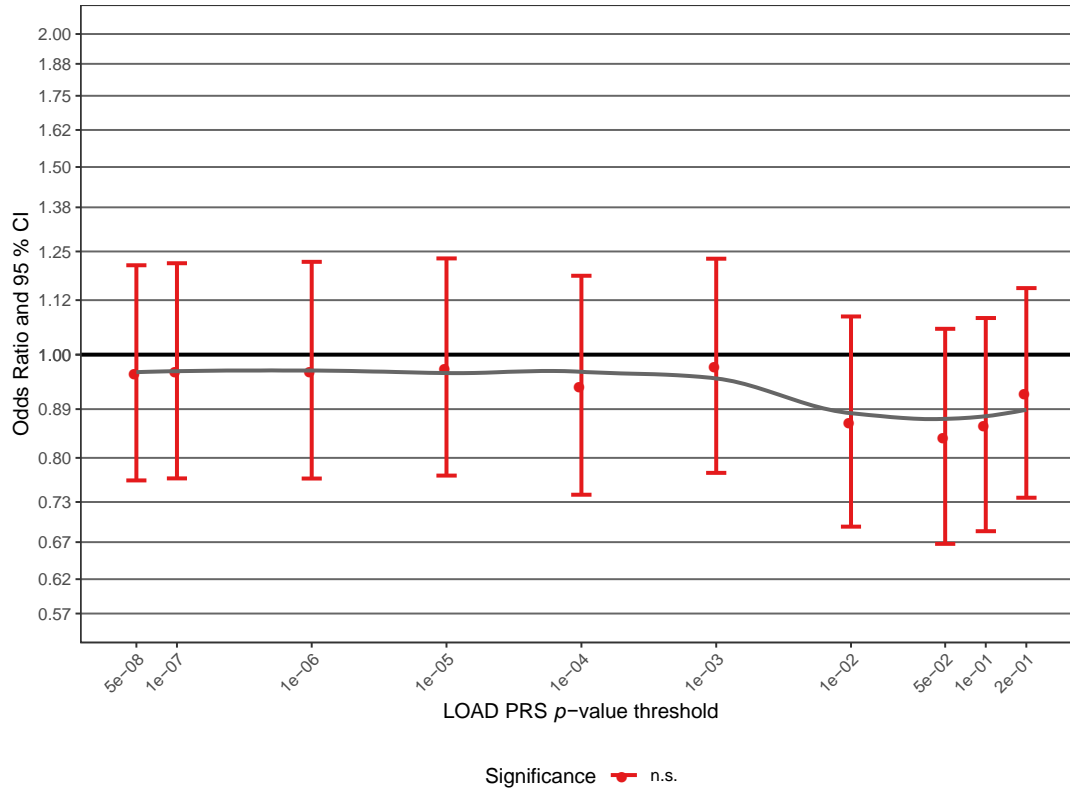

**Supplementary Fig. S6:** Analysis of assortative mating. Further details regarding the analysis and plots are described in the legend for Fig. 2C. Full association test statistics including  $p$ -values are shown in Supplementary Table S7. Significance threshold:  $\alpha=0.05/20=0.0025$ .

**Supplementary Fig. S6A:** Association analysis comparing the BD PRS in unaffected married-in family members and  $CC_{controls}$ .

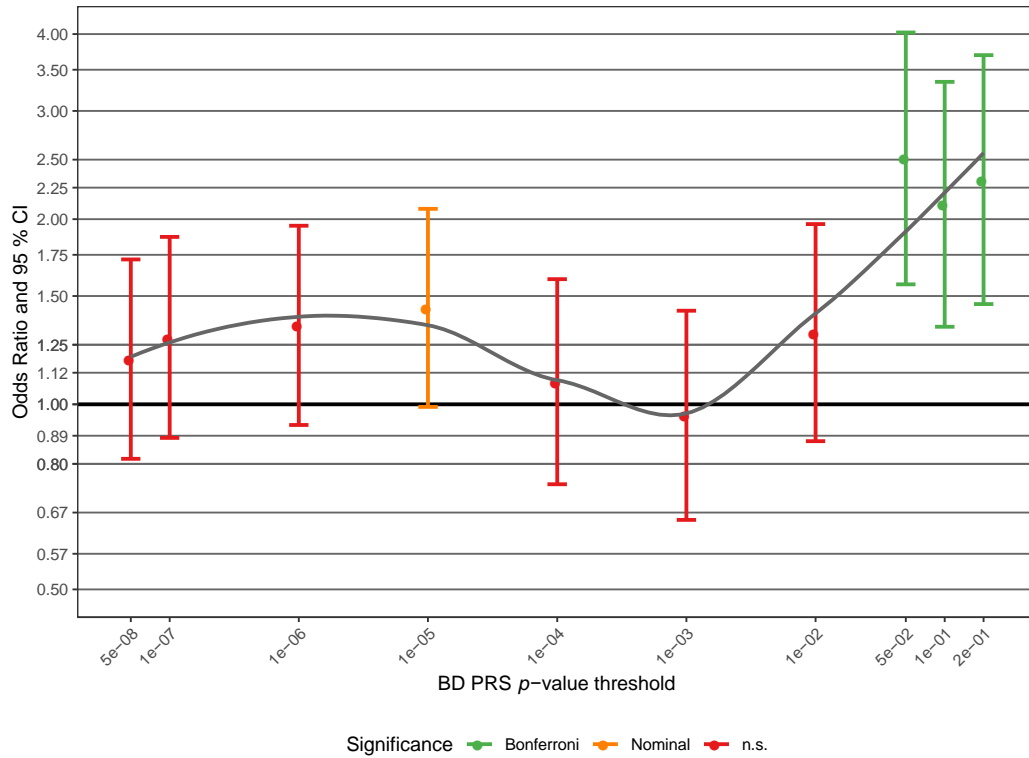

**Supplementary Fig. S6B:** Association analysis comparing the BD PRS in unaffected married-in family members to  $FAM_{unaffected}$ .

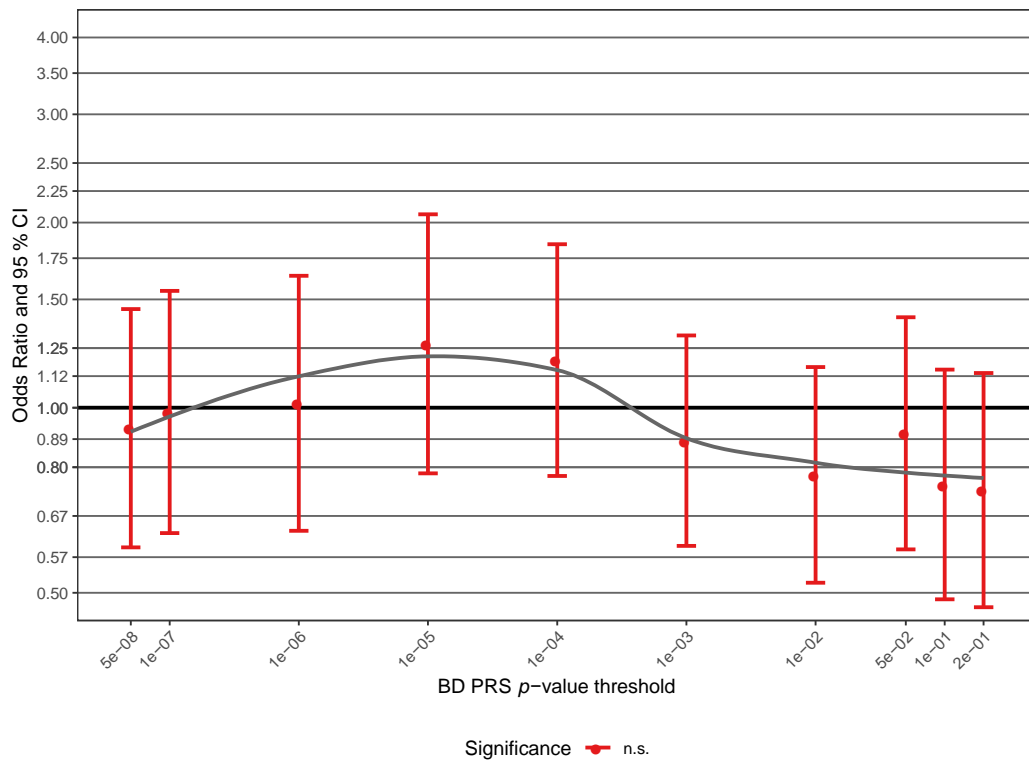



**Supplementary Fig. S7:** Analysis of anticipation in the FAM sample. Further details regarding the analysis and plots are described in the legend for Fig. 2D. Full association test statistics including  $p$ -values are shown in Supplementary Table S8.

**Supplementary Fig. S7A:** Association of the BD PRS with generation.

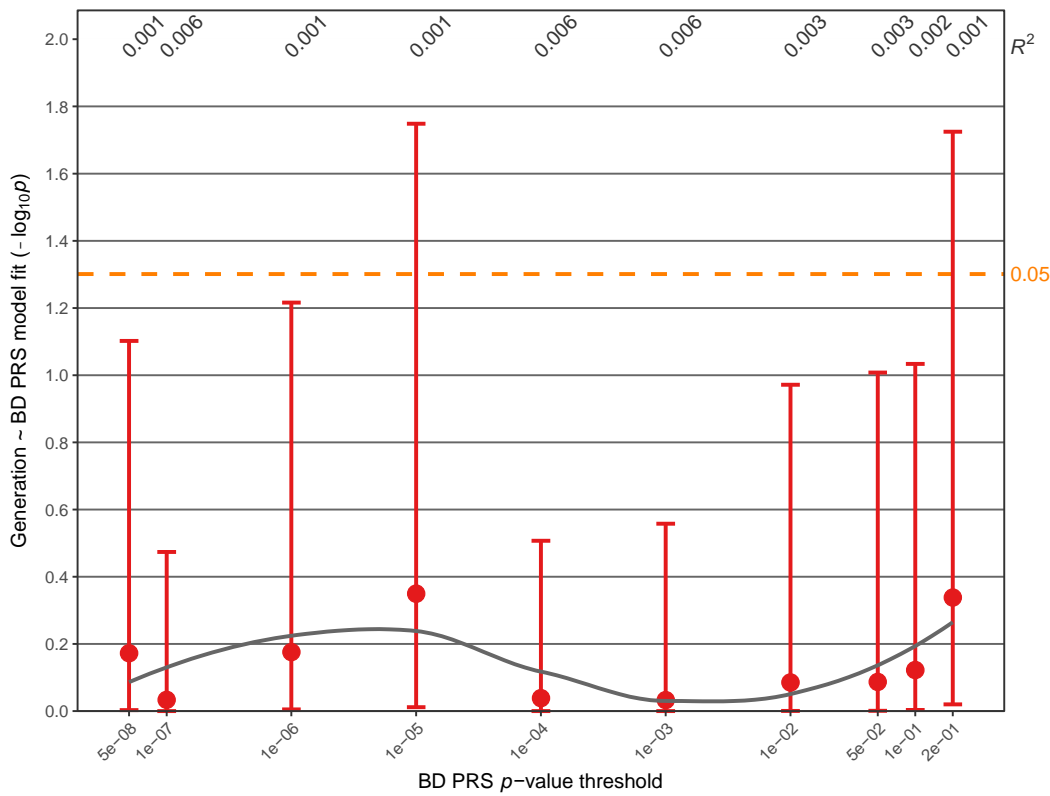

**Supplementary Fig. S7B:** Association analysis comparing the age at onset for BD across generations. The age at onset did not decrease over generations ( $p=0.54$ , Supplementary Table S8). Covariates were sex and age. One-sided  $p$ -values were calculated, following the hypothesis that the age at onset decreases across generations. The y-axis shows the residuals from the linear model.

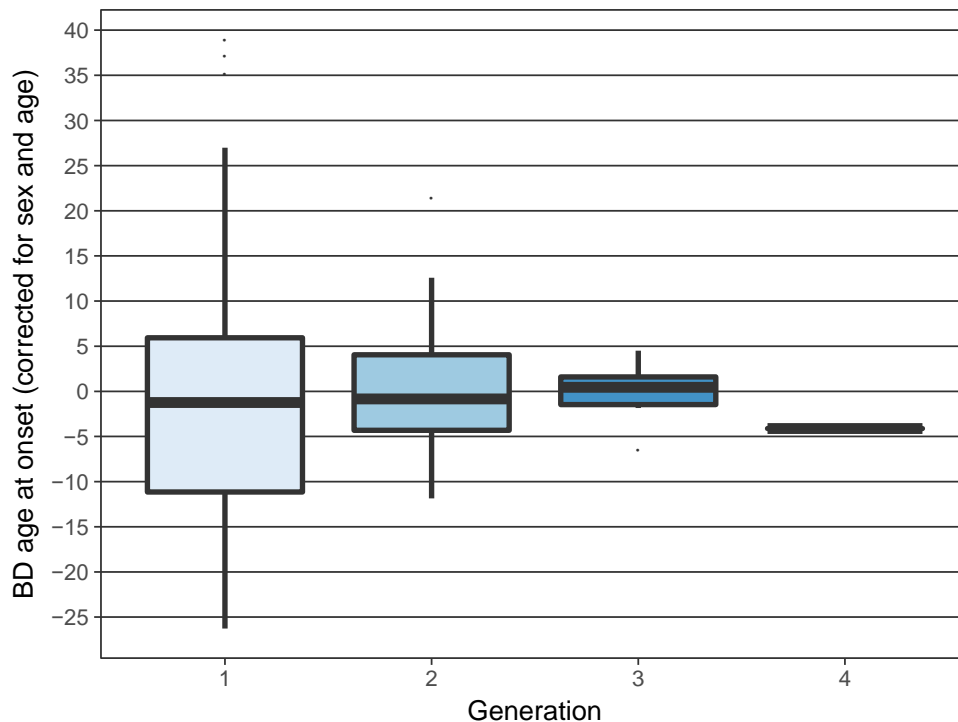

**Supplementary Fig. S8:** Boxplots of PRS at different  $p$ -value thresholds, including FAM<sub>MDD</sub> cases. The following individuals are not shown in these plots: Family members with a history of substance abuse, married-in family members, and CC<sub>BD</sub> cases.  
**Supplementary Fig. S8A:** Boxplots of BD PRS.

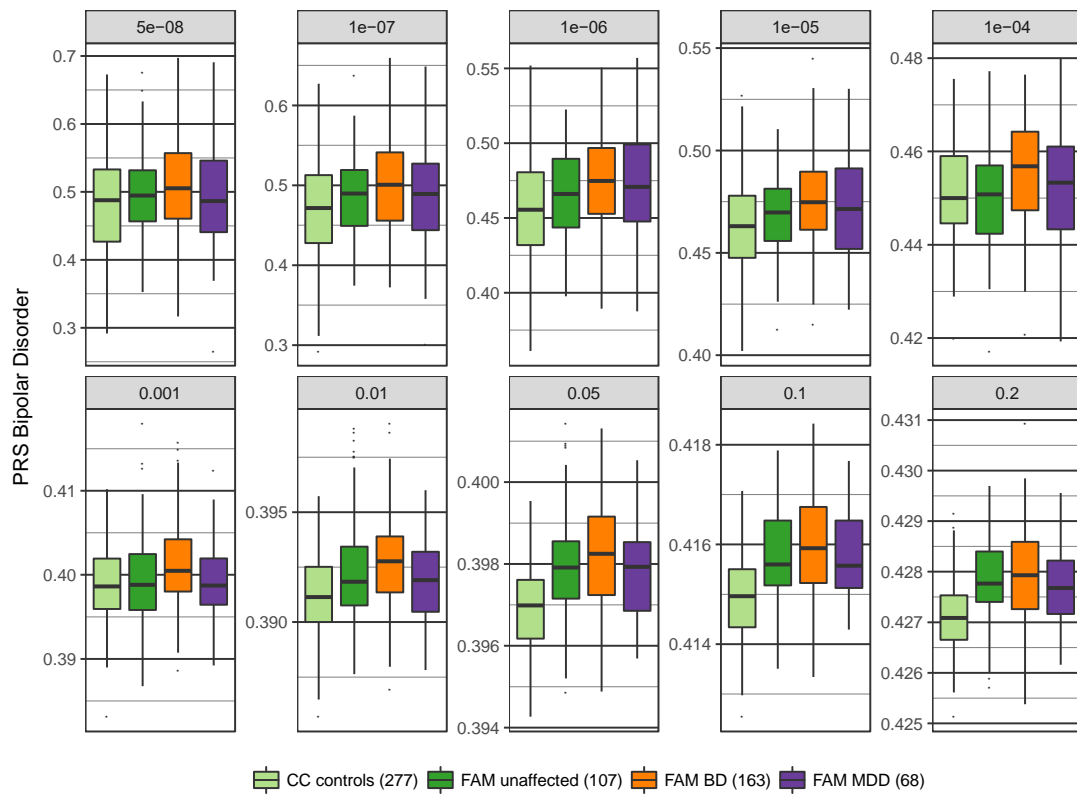

**Supplementary Fig. S8B:** Boxplots of SCZ PRS.

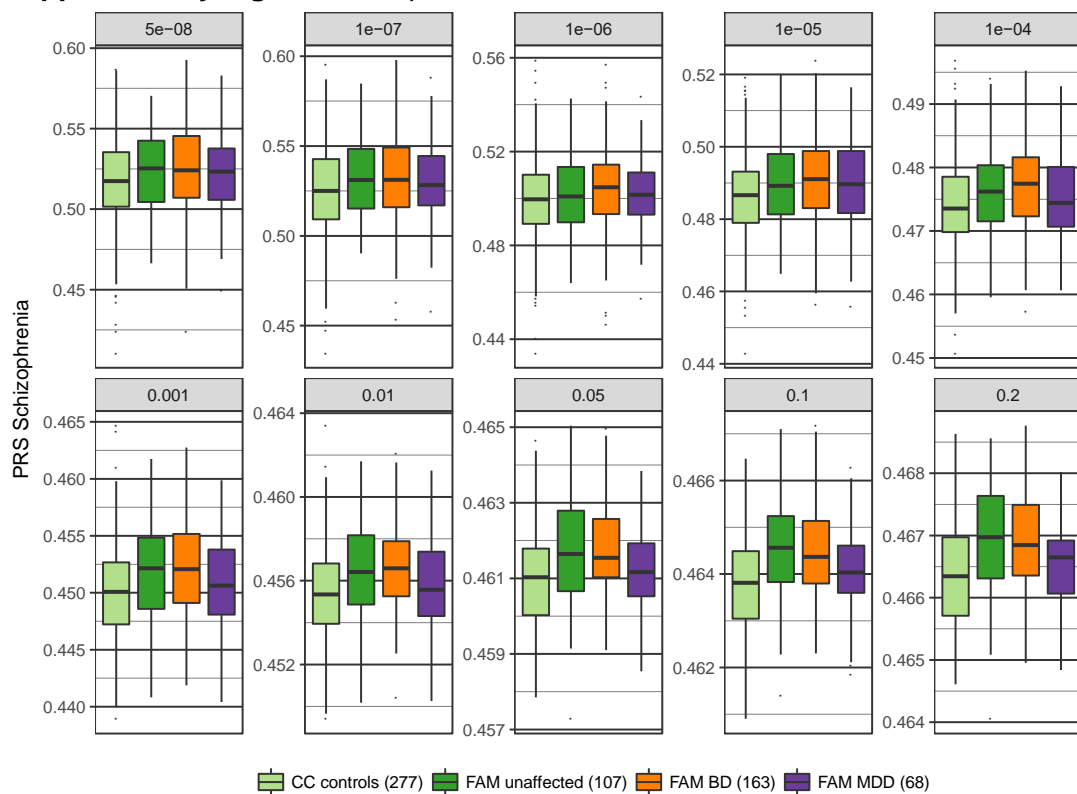

**Supplementary Fig. S8C: Boxplots of MDD PRS.**

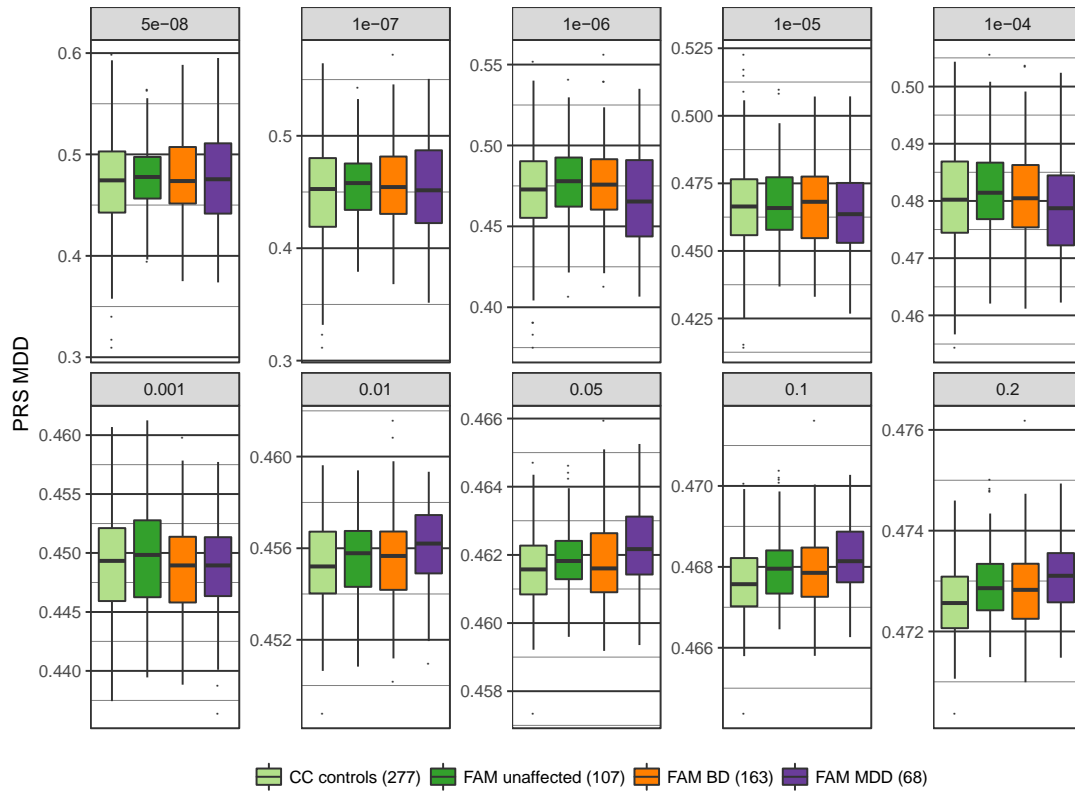

**Supplementary Fig. S8D: Boxplots of the BD+SCZ+MDD Shared PRS.**

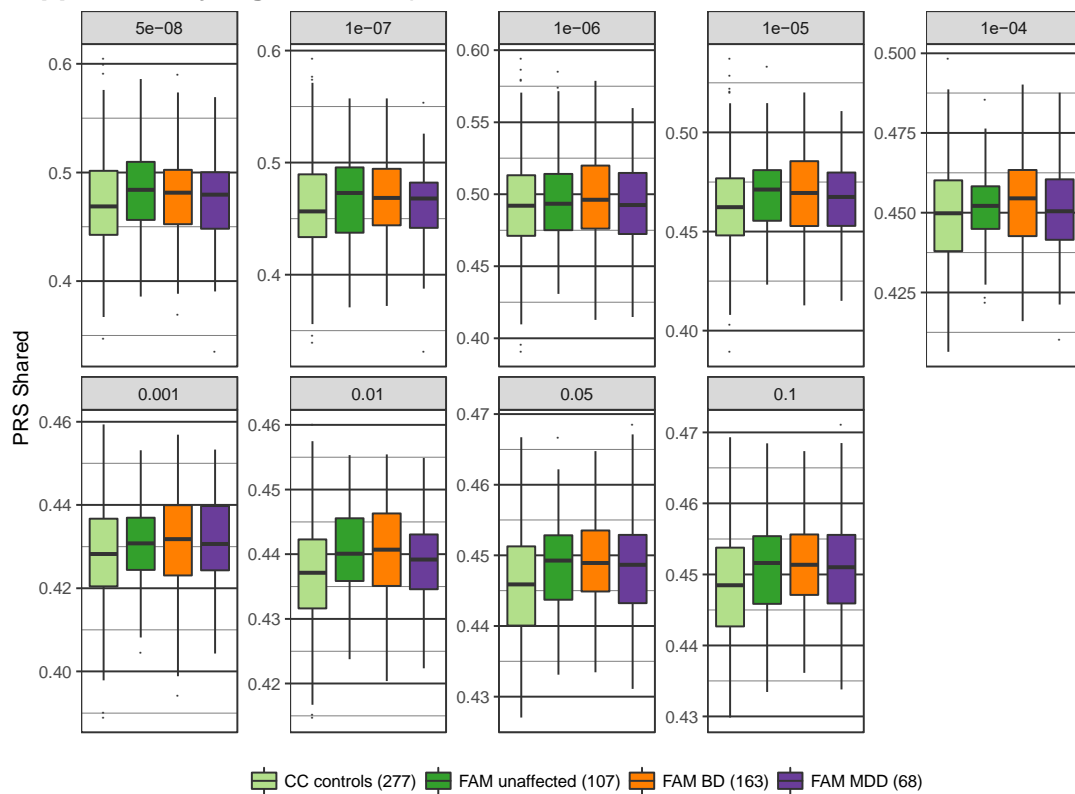

**Supplementary Fig. S8E: Boxplots of the MDD-BD GWIS PRS.**

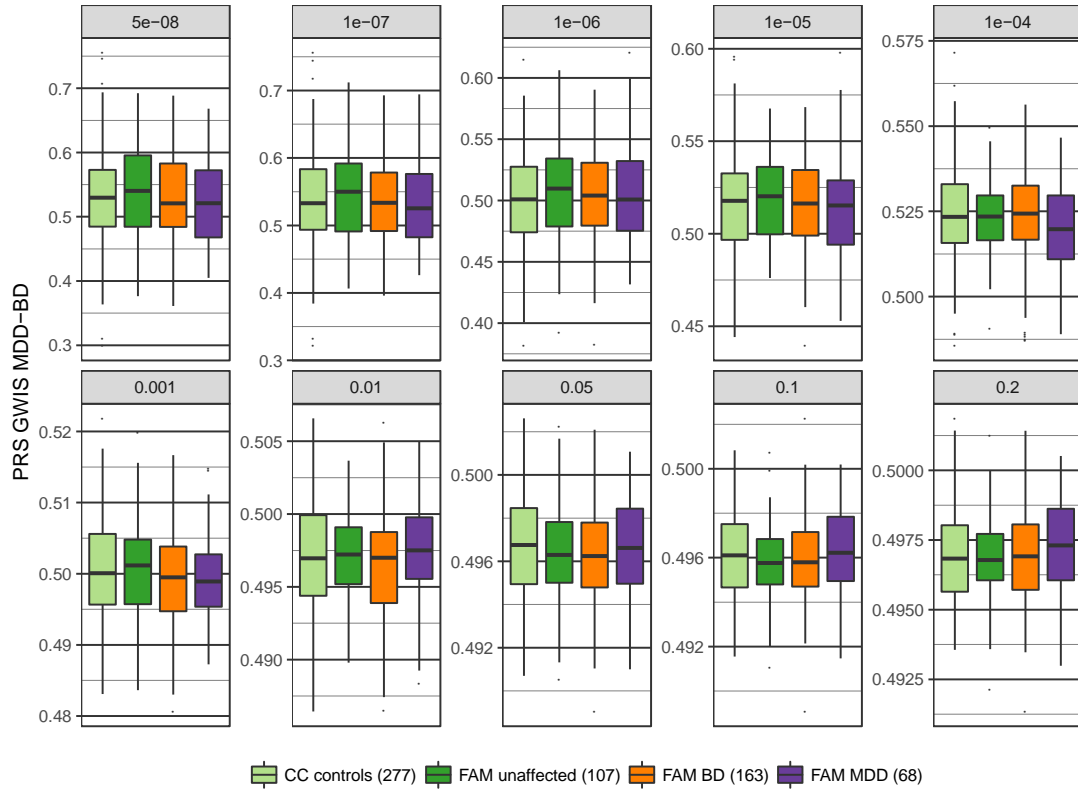

**Supplementary Fig. S8F: Boxplots of the MDD-SCZ GWIS PRS.**

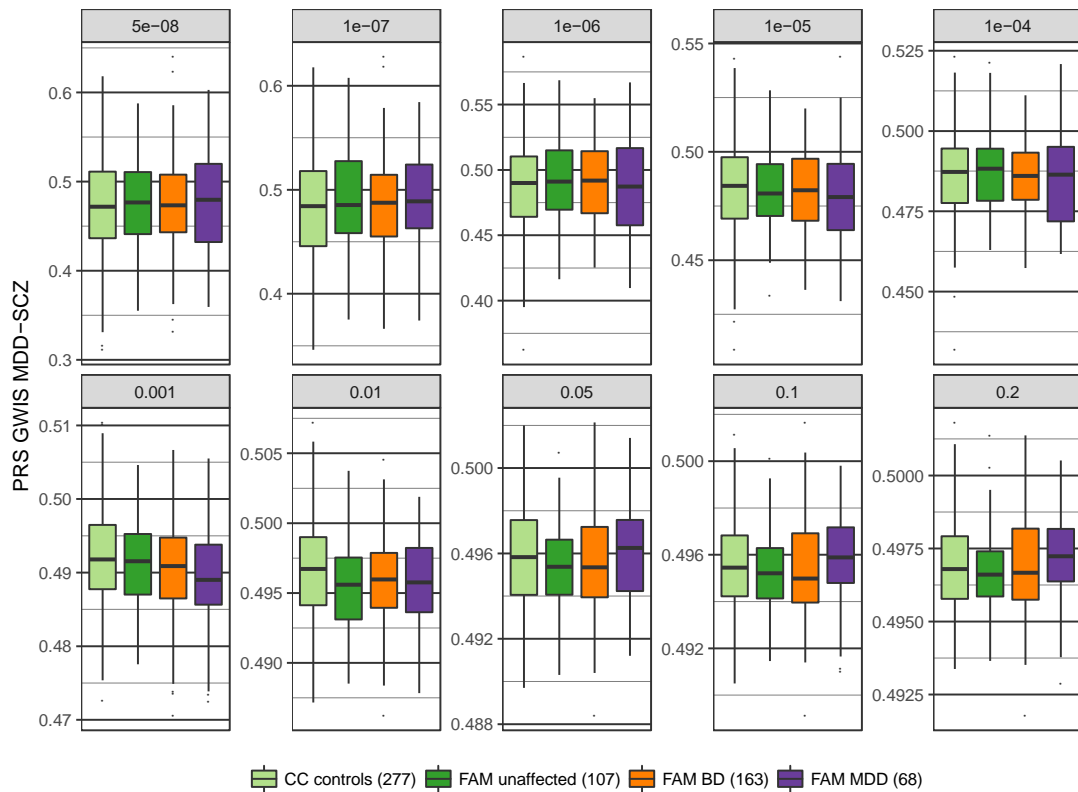

**Supplementary Fig. S8G: Boxplots of the BD-MDD GWIS PRS.**

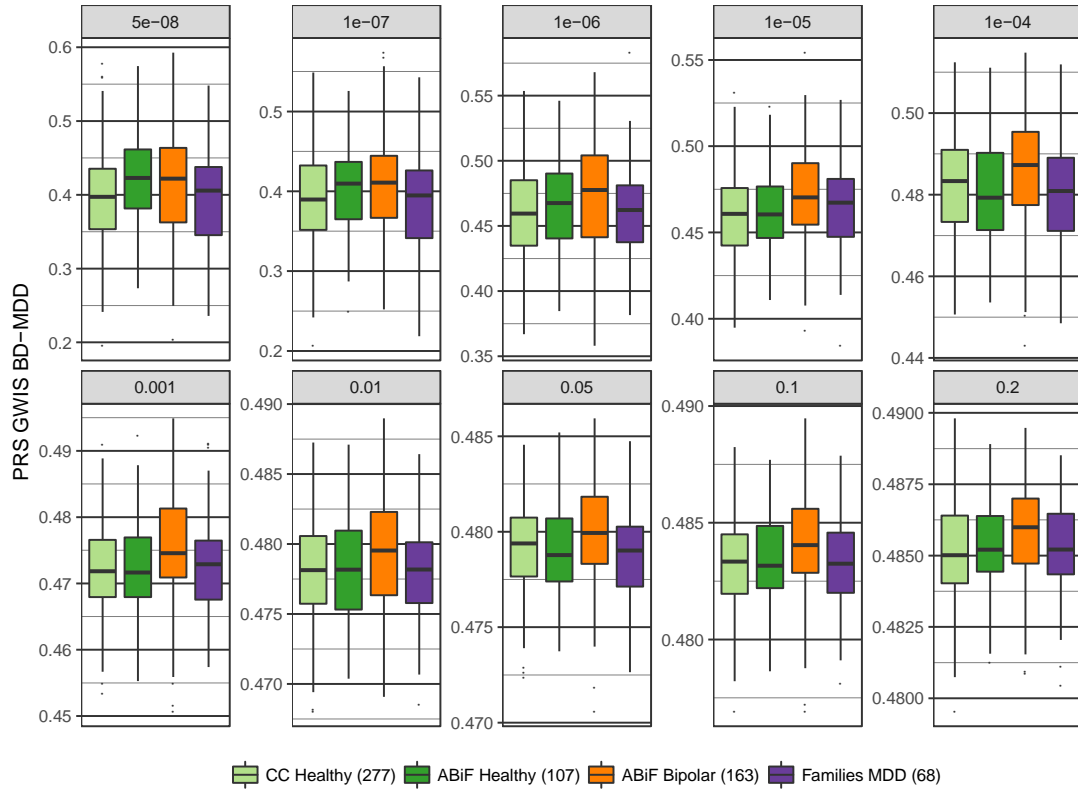

**Supplementary Fig. S8H: Boxplots of the SCZ-MDD GWIS PRS.**

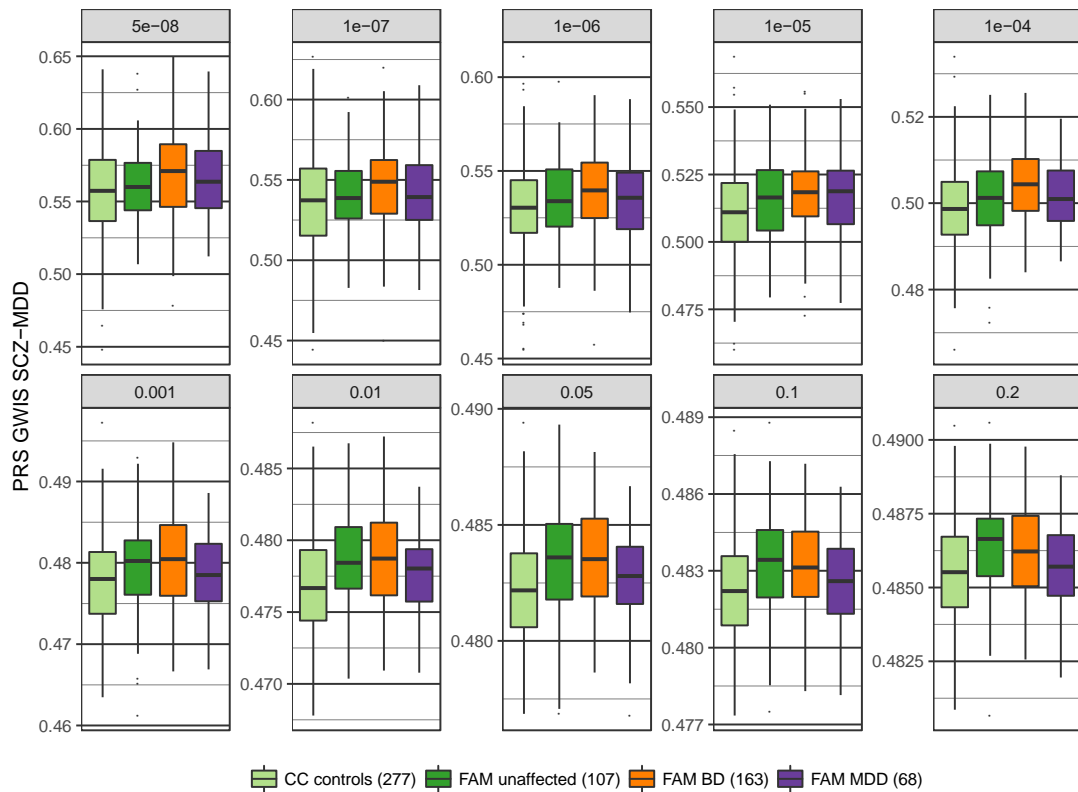

**Supplementary Fig. S8I: Boxplots of the SCZ-BD GWIS PRS.**

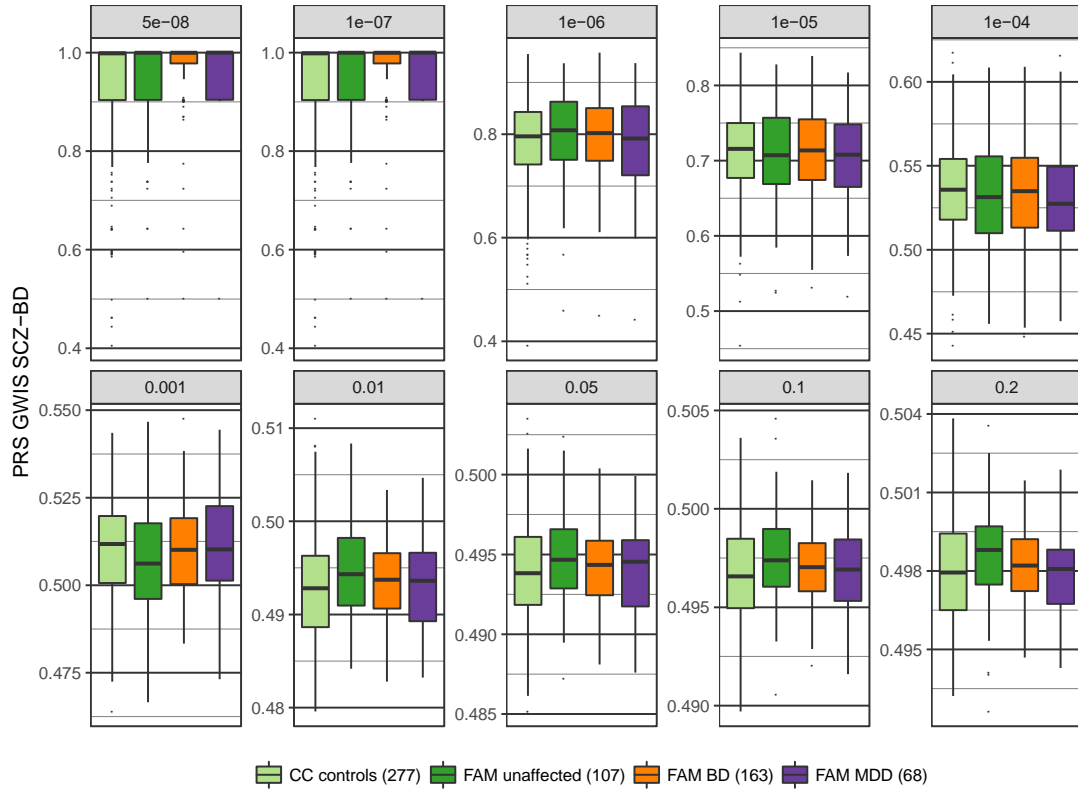

**Supplementary Fig. S8J: Boxplots of the LOAD (Alzheimer) PRS.**

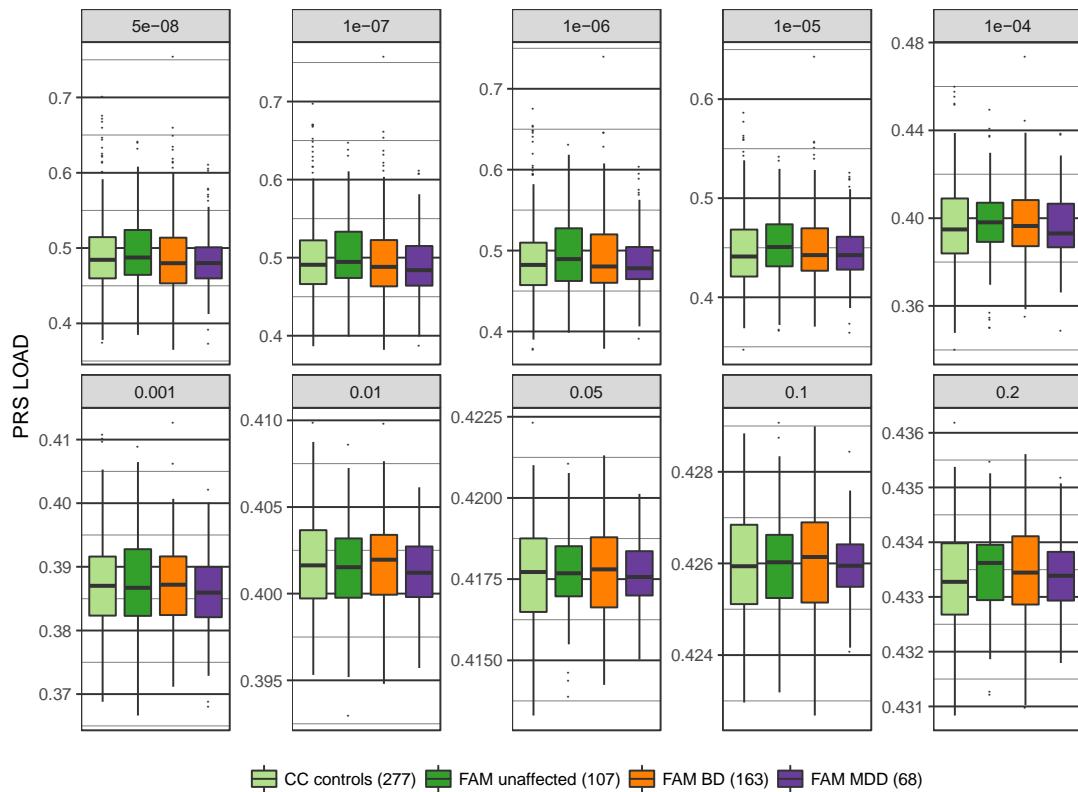

**Supplementary Fig. S9:** Association analysis comparing PRS in FAM<sub>MDD</sub> cases and CC<sub>controls</sub>. Further details of the plots are described in the legend for Fig. 1. Full association test statistics including  $p$ -values are shown in Supplementary Table S9.  
**Supplementary Fig. S9A:** Top-associated  $p$ -value thresholds for the tested PRS. The column to the left shows PRS and  $p_{PRS}$  thresholds.

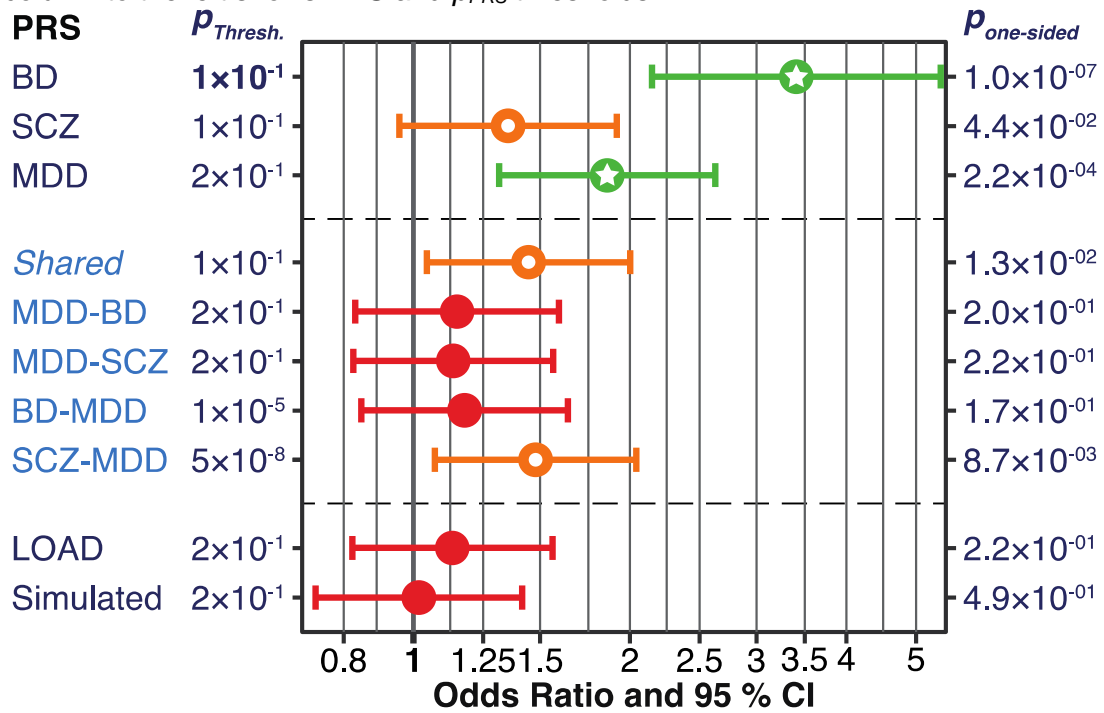

Significance: ★ Bonferroni ○ Nominal ● n.s.

**Supplementary Fig. S9B:** Association of the BD PRS (all  $p$ -value thresholds).

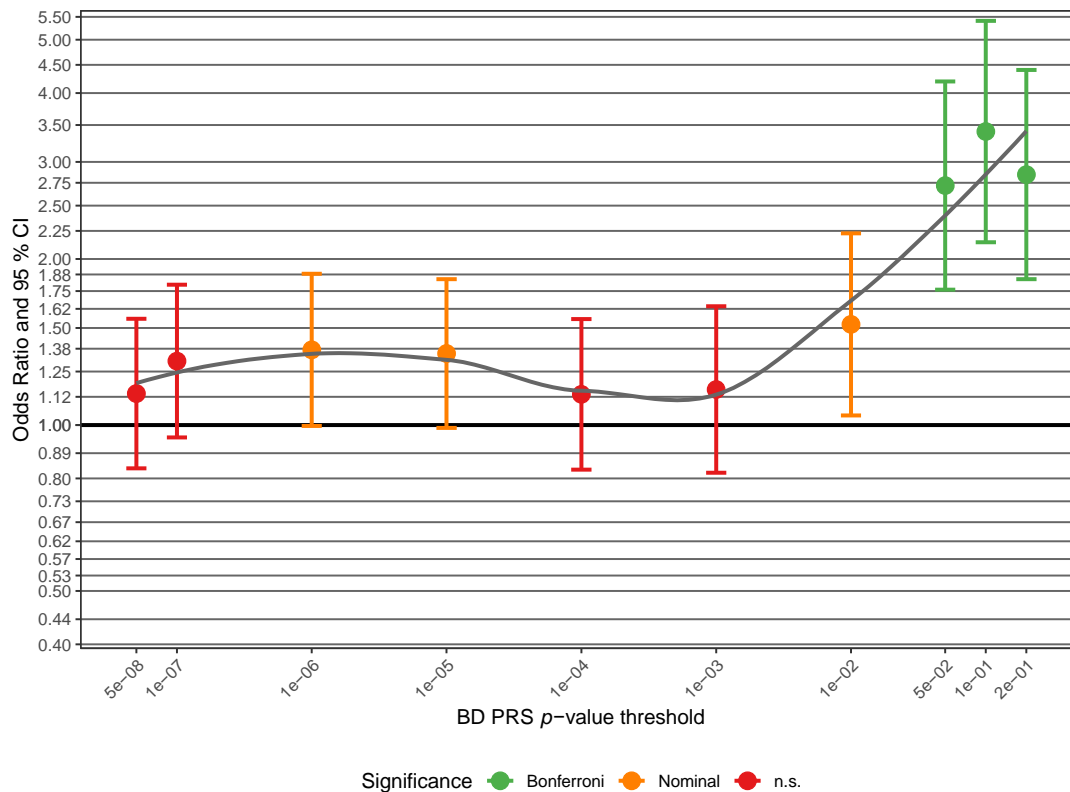

Significance ★ Bonferroni ○ Nominal ● n.s.

**Supplementary Fig. S9C: Association of the SCZ PRS.**

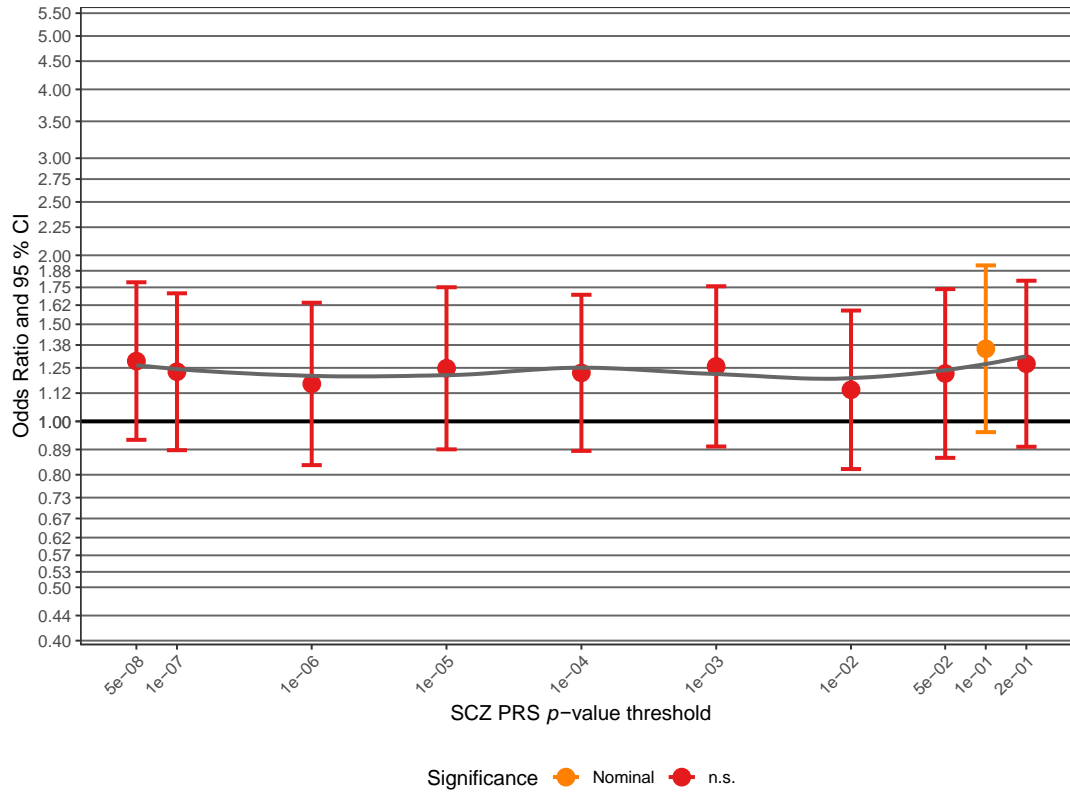

**Supplementary Fig. S9D: Association of the MDD PRS.**

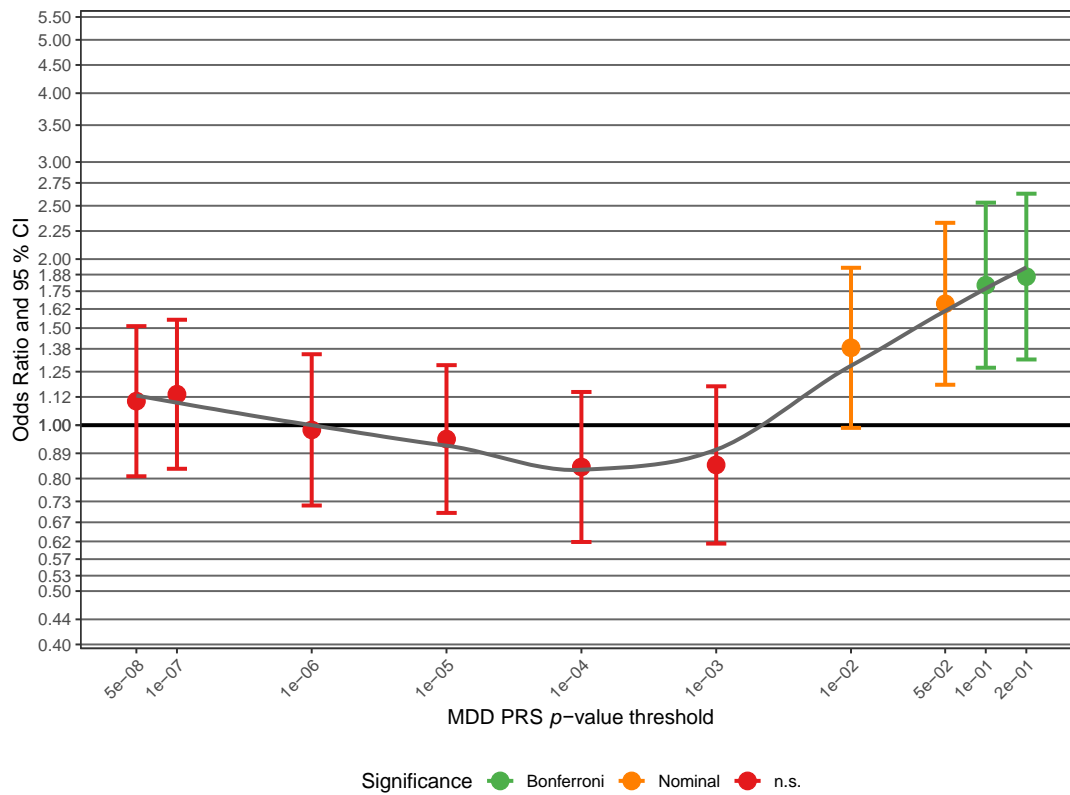



**Supplementary Fig. S9E: Association of the *Shared* PRS.**

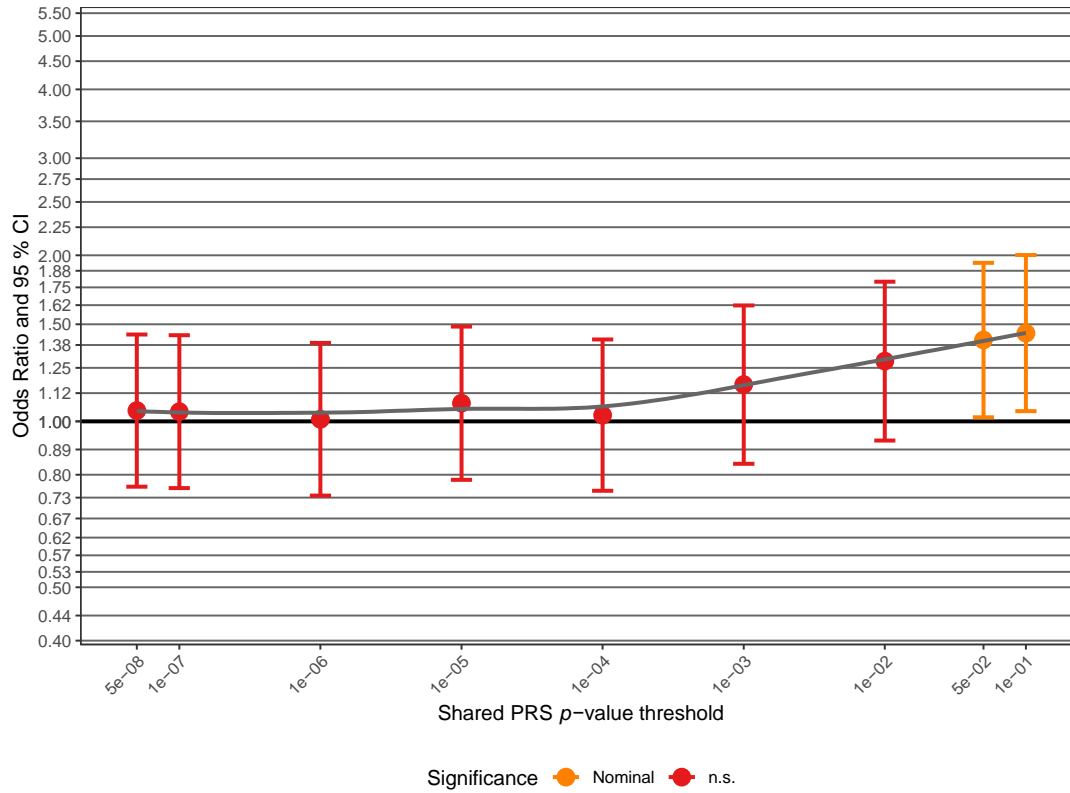

**Supplementary Fig. S9F: Association of the MDD-BD GWIS PRS.**

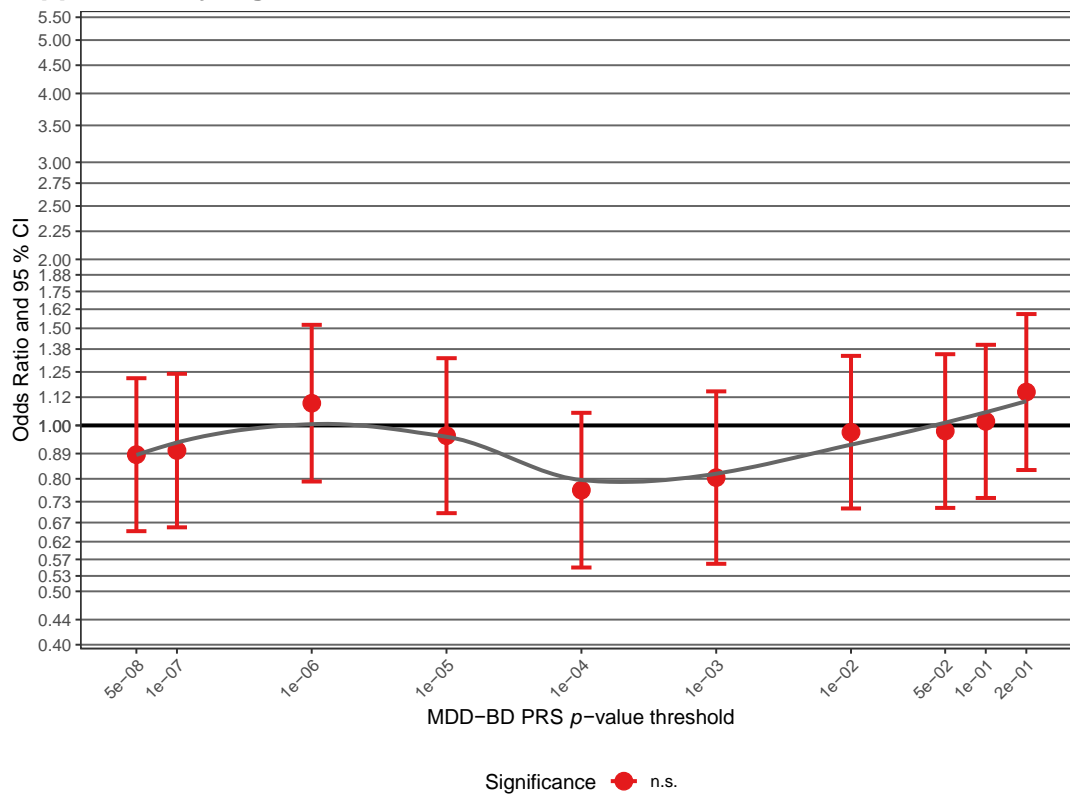

**Supplementary Fig. S9G: Association of the MDD-SCZ GWIS PRS.**

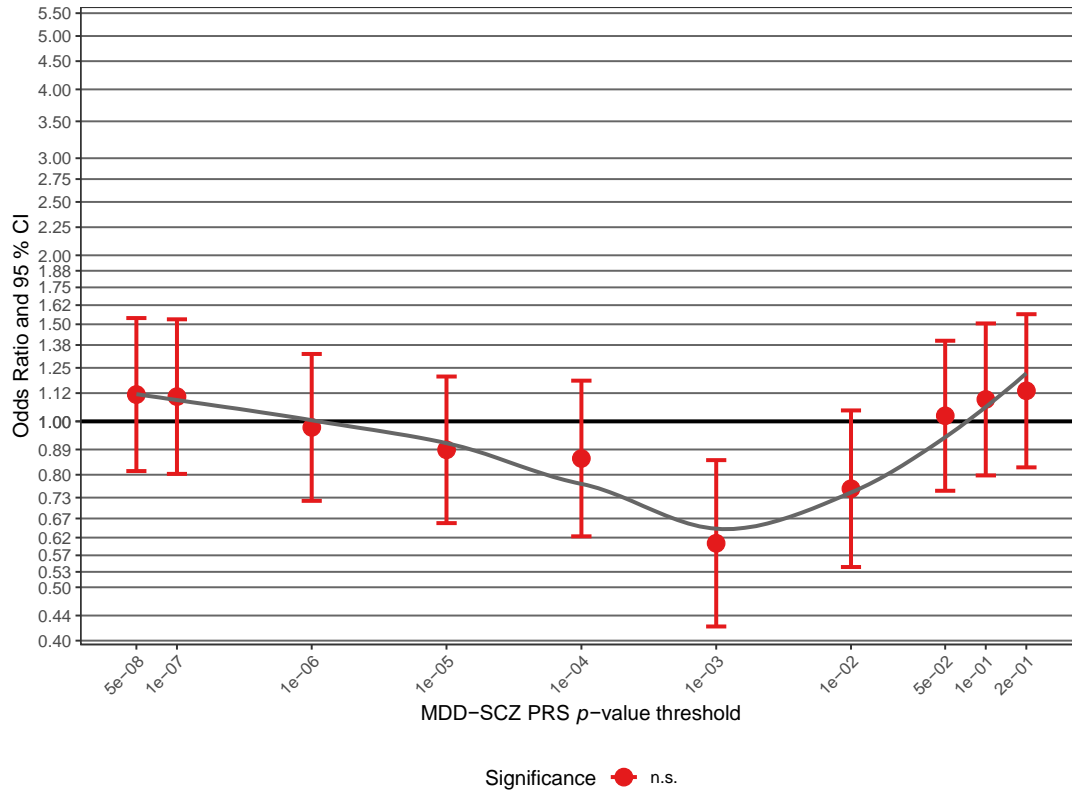

**Supplementary Fig. S9H: Association of the BD-MDD GWIS PRS.**

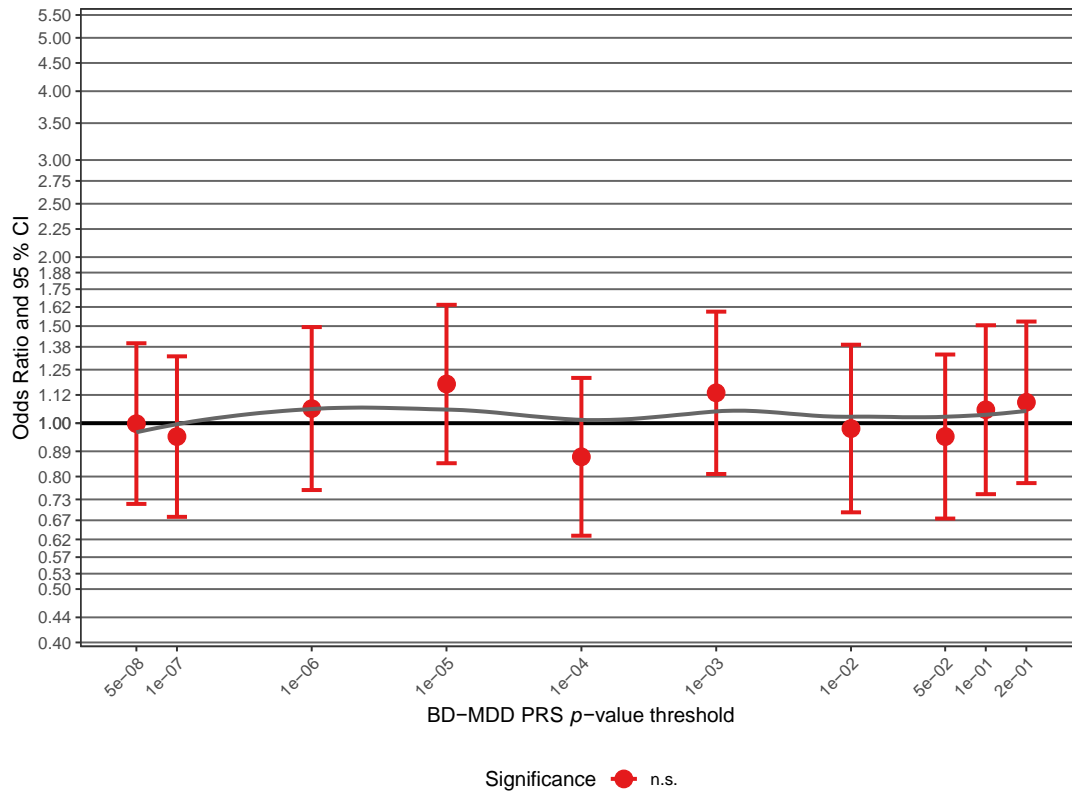

**Supplementary Fig. S9I: Association of the SCZ-MDD GWIS PRS.**

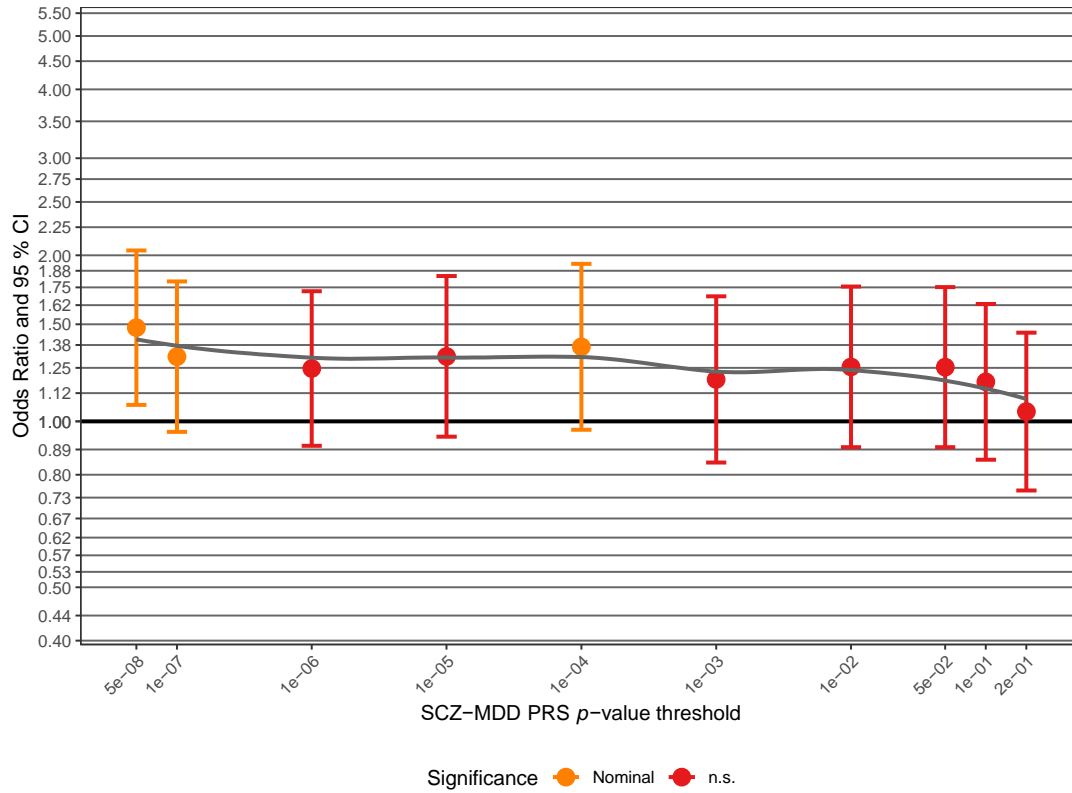

**Supplementary Fig. S9J: Association of the SCZ-BD GWIS PRS.**

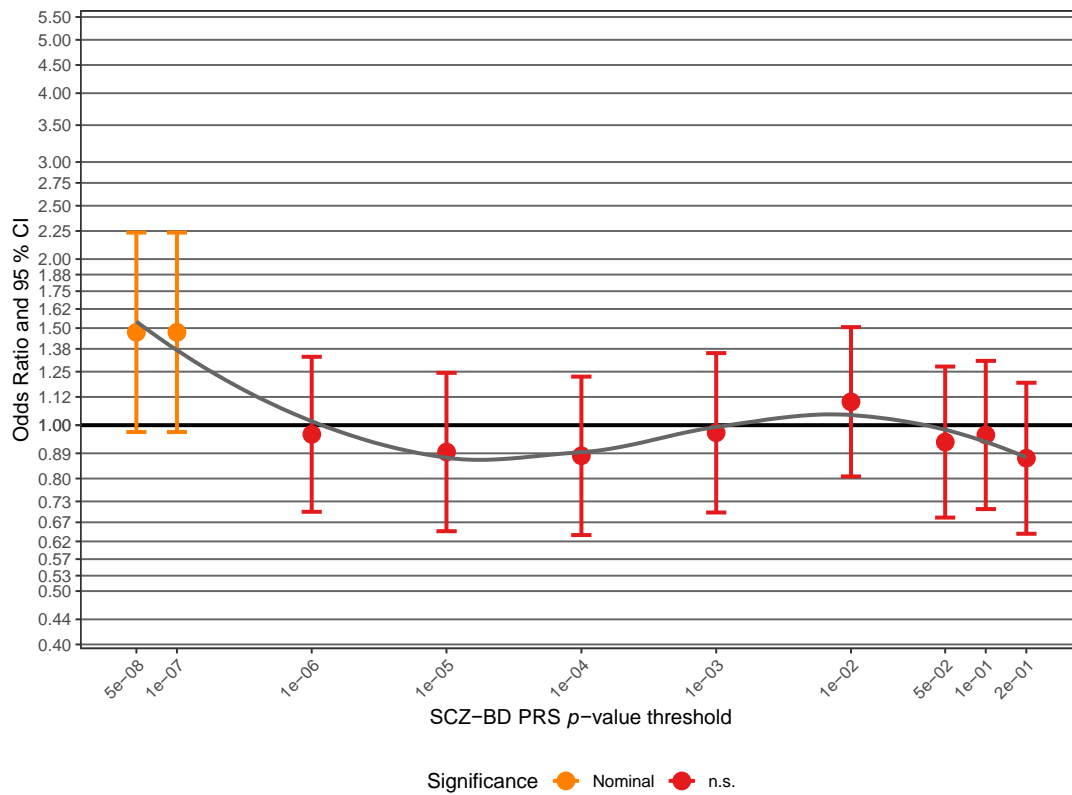

**Supplementary Fig. S9K: Association of the LOAD PRS.**

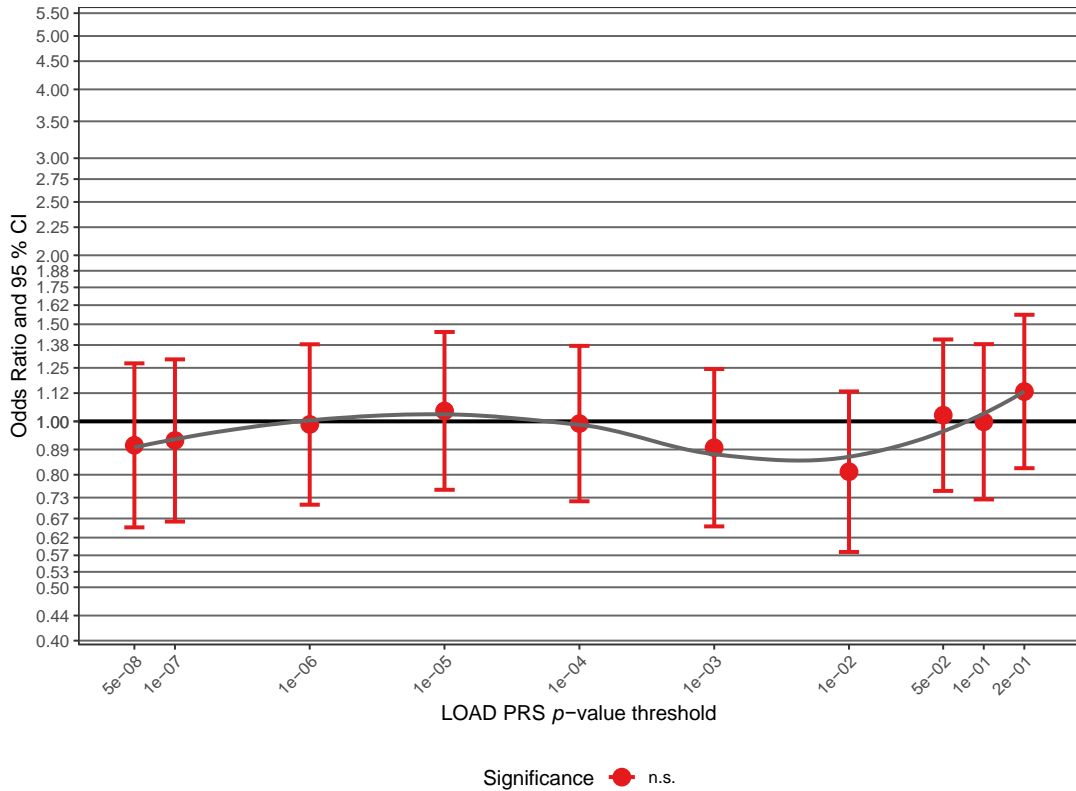

**Supplementary Fig. S10: Association analysis comparing PRS in FAM<sub>MDD</sub> cases and FAM<sub>unaffected</sub>.** Further details of the plots are given in the legends for Figs. 1 and 2. Full association test statistics including  $p$ -values are shown in Supplementary Table S10.  
**Supplementary Fig. S10A: Top-associated  $p_{PRS}$  thresholds for the tested PRS.** The column to the left shows PRS and  $p_{PRS}$  thresholds.

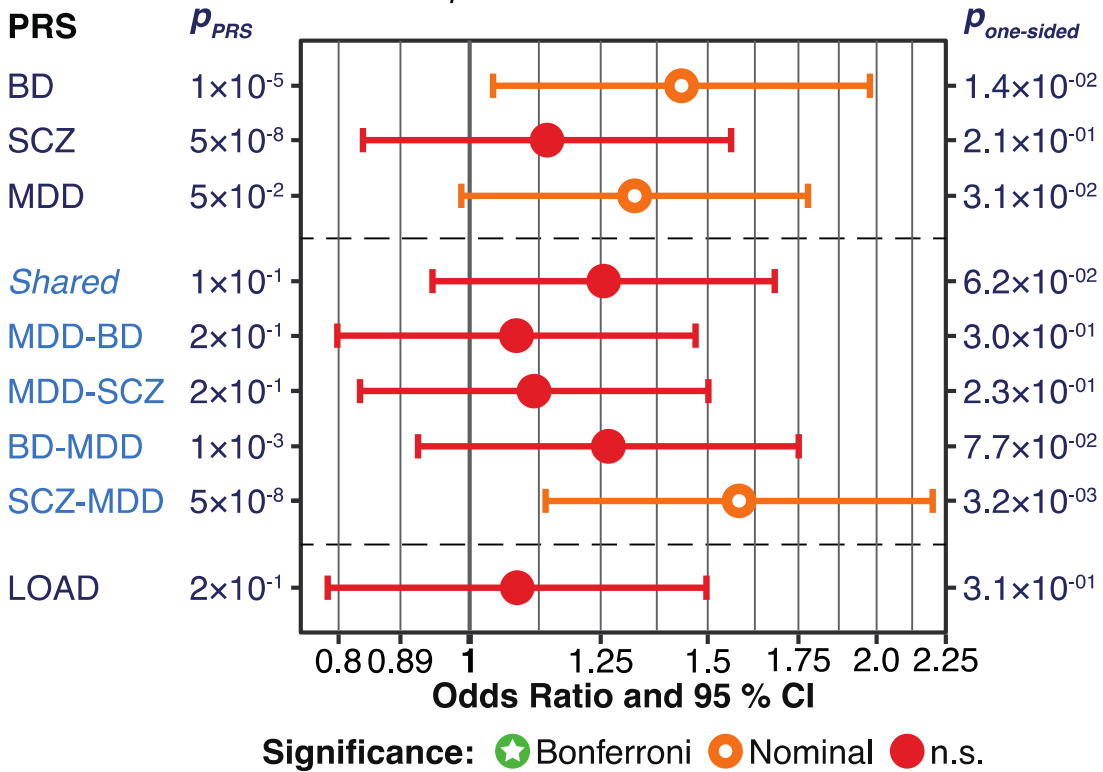

**Supplementary Fig. S10B: Association of the BD PRS (all  $p$ -value thresholds).**

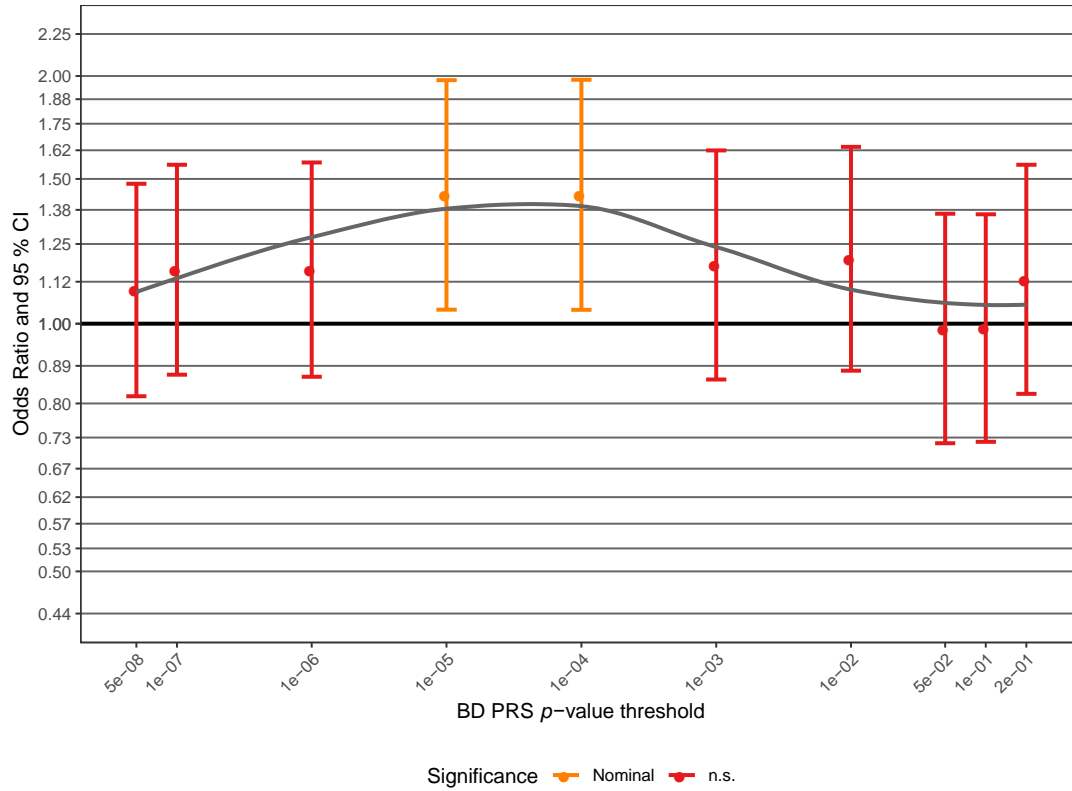

**Supplementary Fig. S10C: Association of the SCZ PRS.**

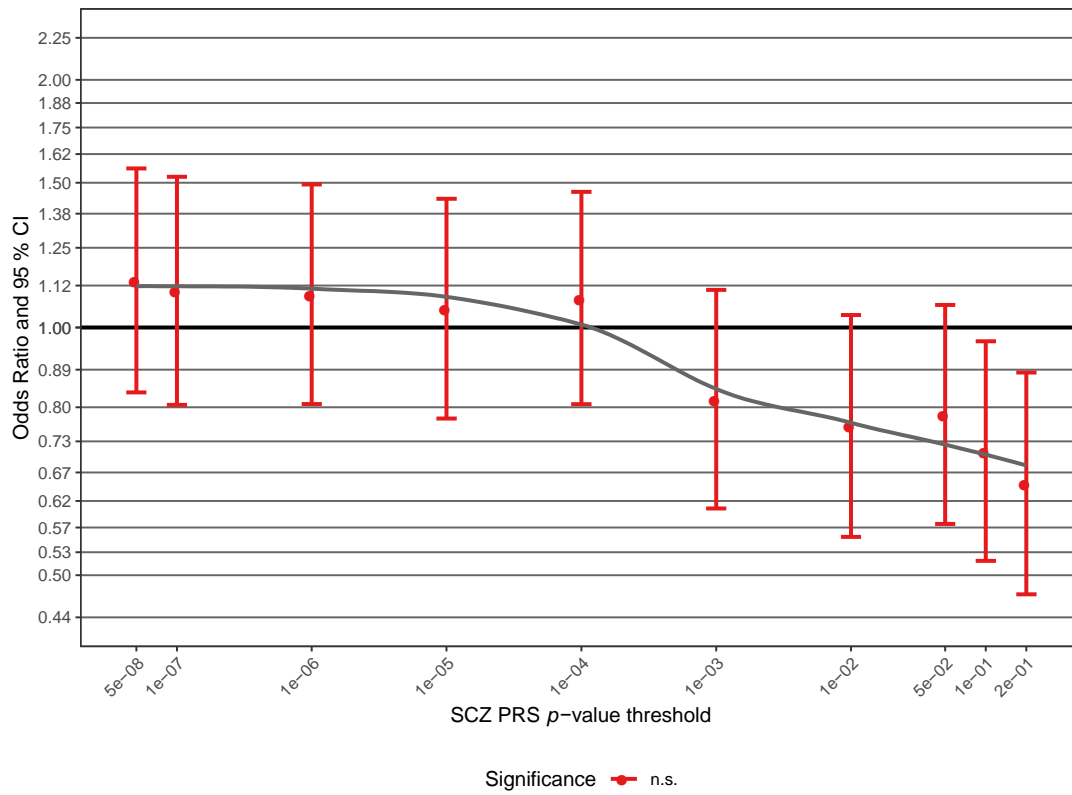

**Supplementary Fig. S10D: Association of the MDD PRS.**

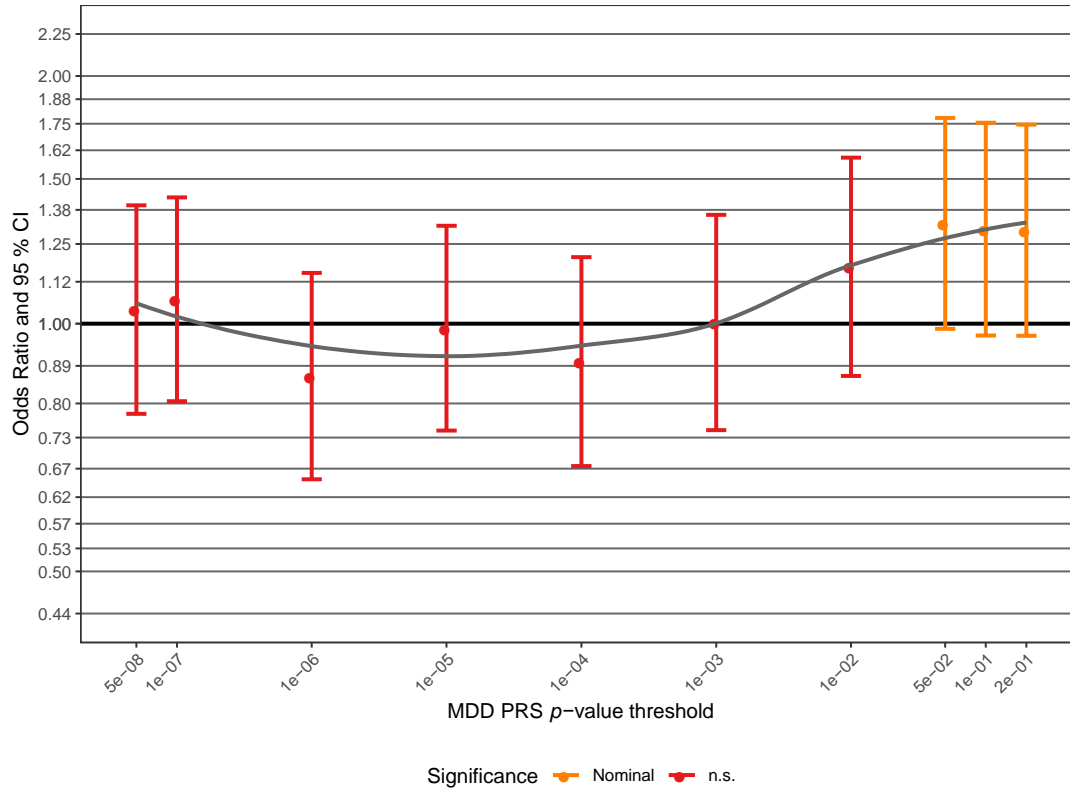

**Supplementary Fig. S10E: Association of the Shared PRS.**

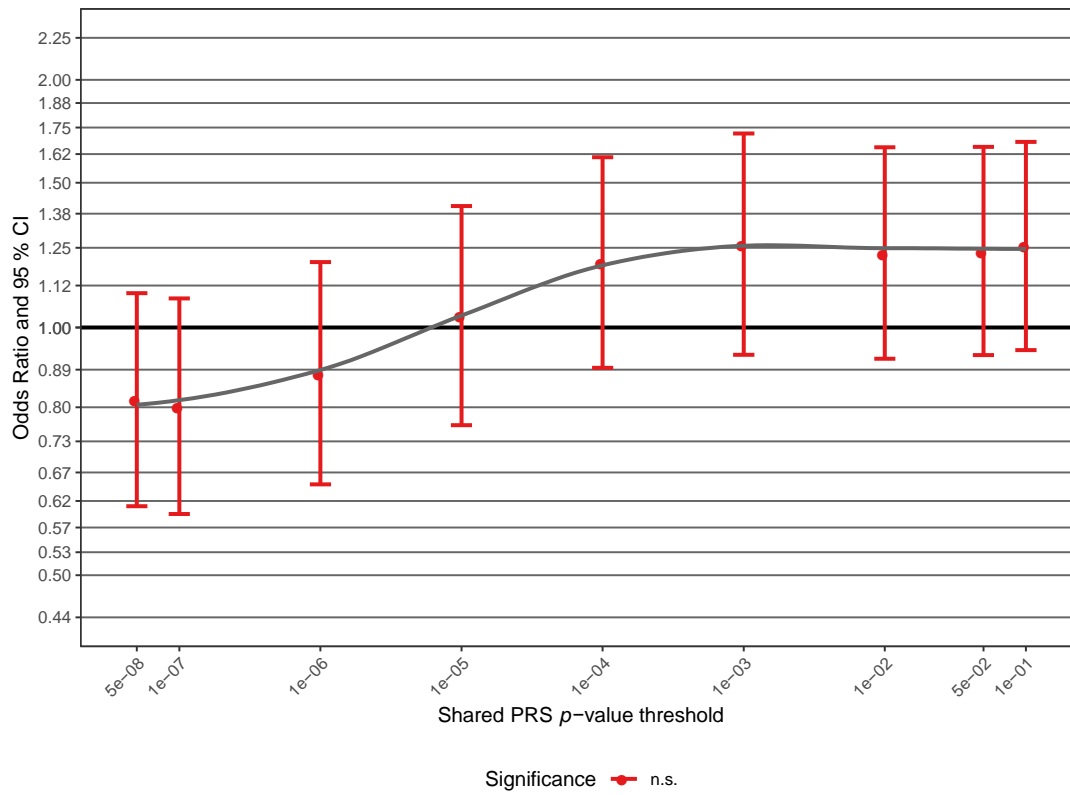

**Supplementary Fig. S10F: Association of the MDD-BD GWIS PRS.**

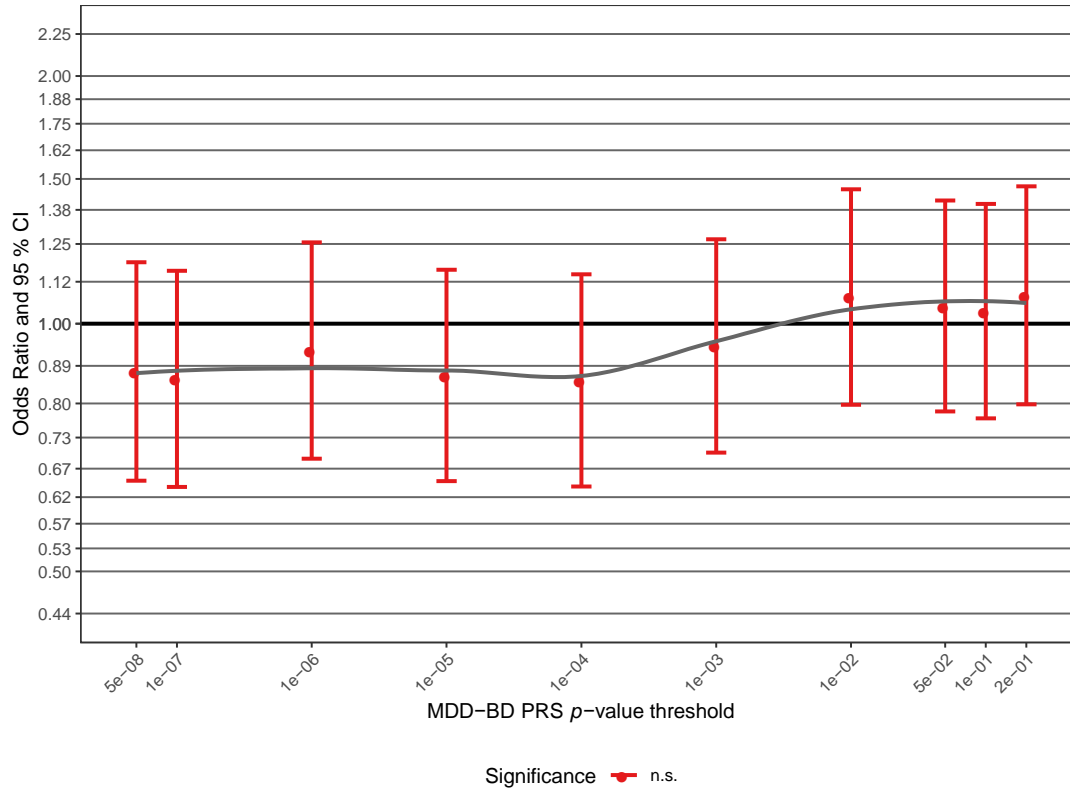

**Supplementary Fig. S10G: Association of the MDD-SCZ GWIS PRS.**

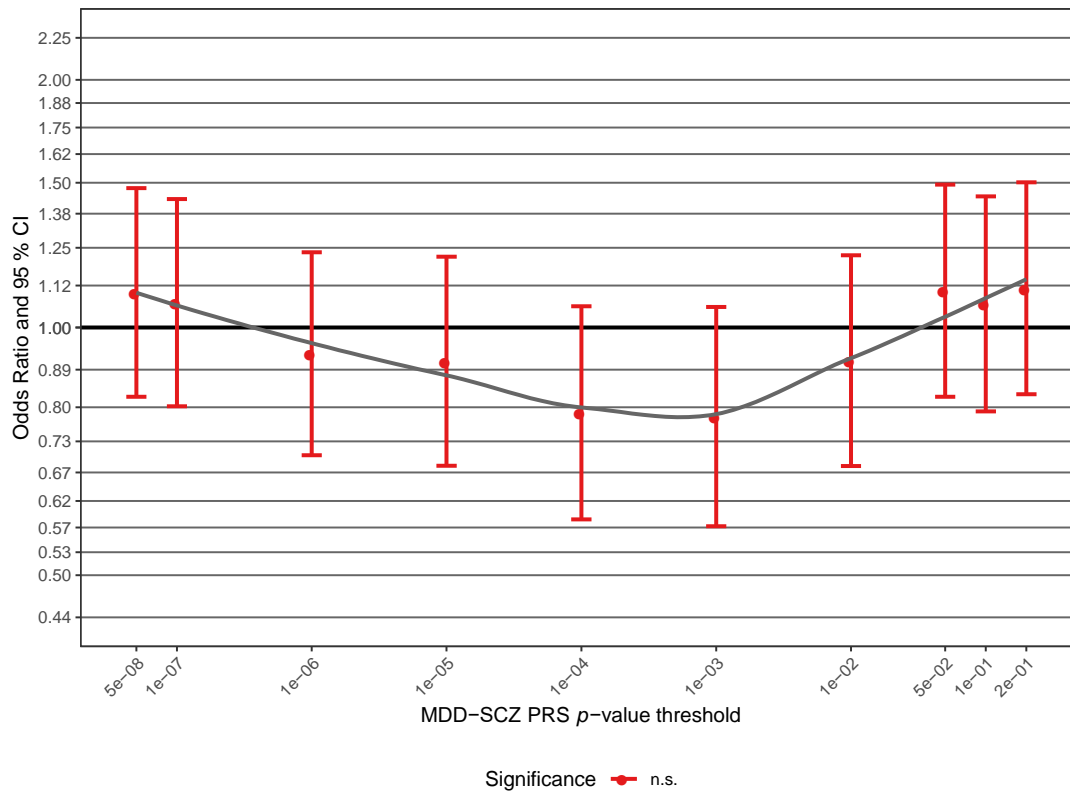

**Supplementary Fig. S10H: Association of the BD-MDD GWIS PRS.**

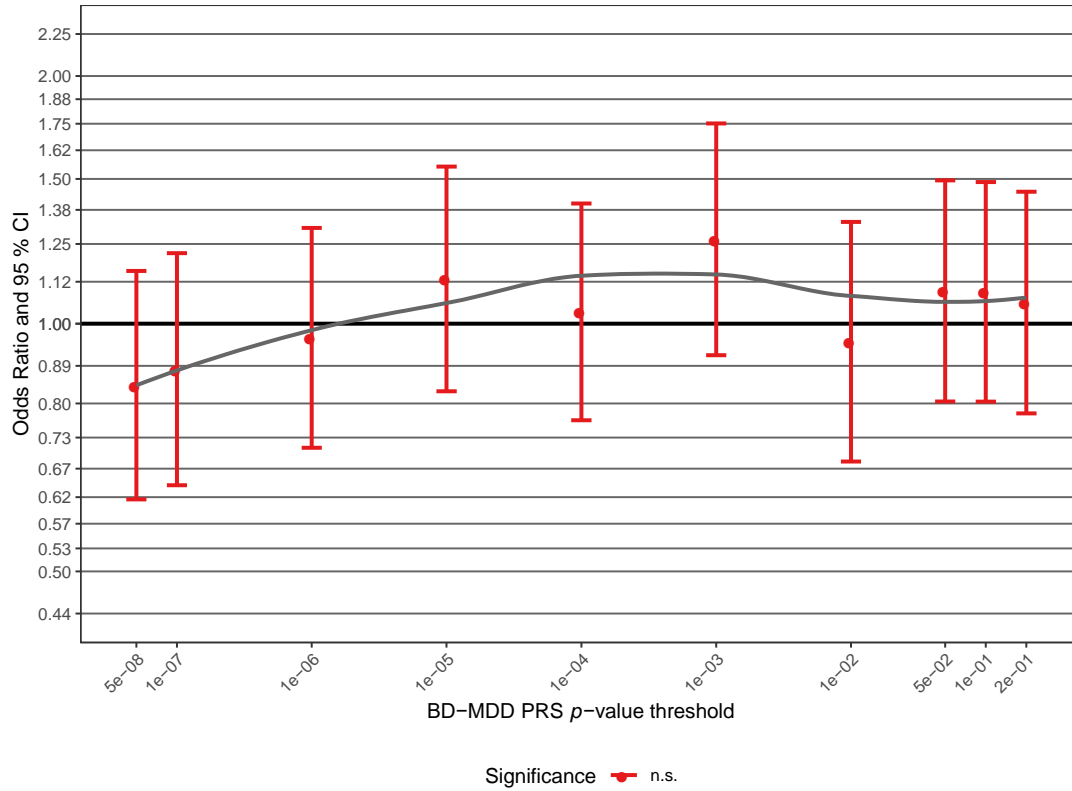

**Supplementary Fig. S10I: Association of the SCZ-MDD GWIS PRS.**

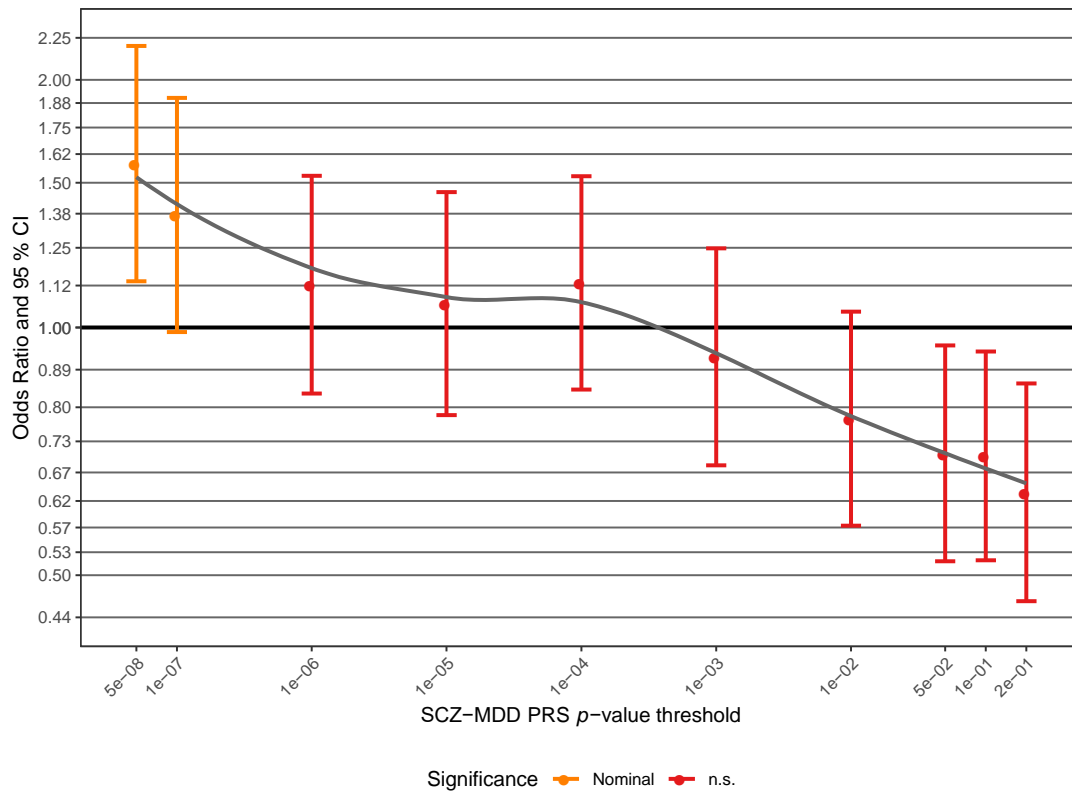



**Supplementary Fig. S10J: Association of the SCZ-BD GWIS PRS.**

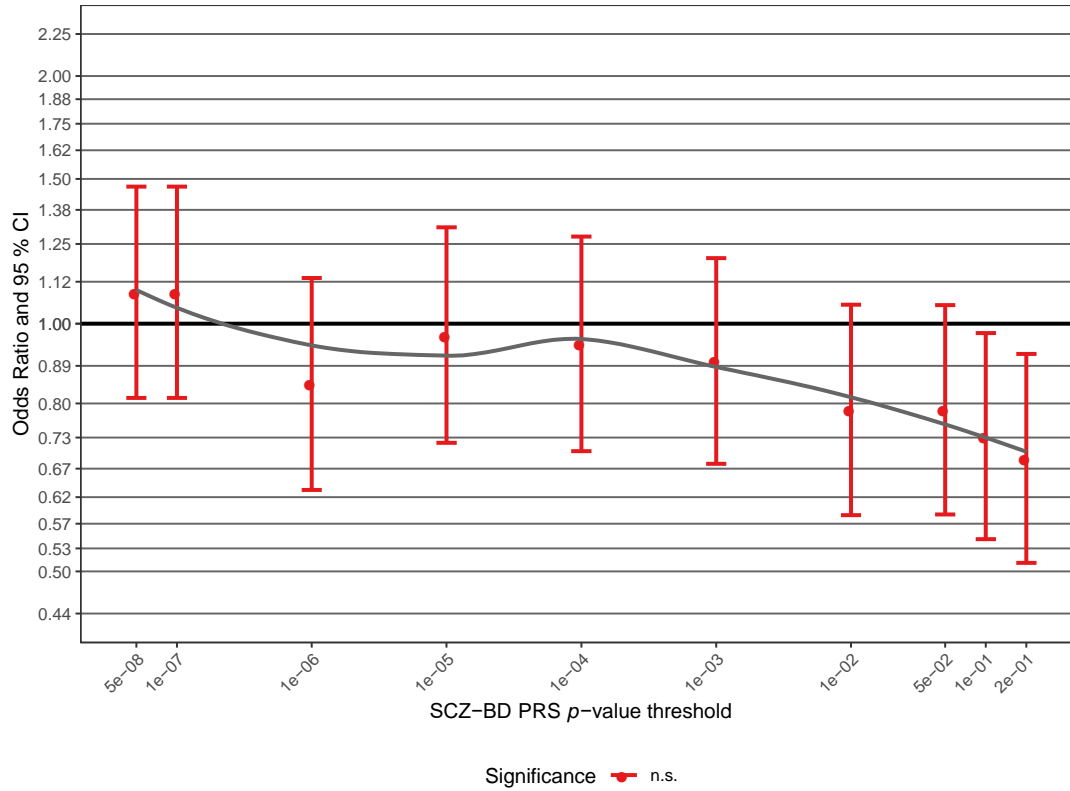

**Supplementary Fig. S10K: Association of the LOAD PRS.**

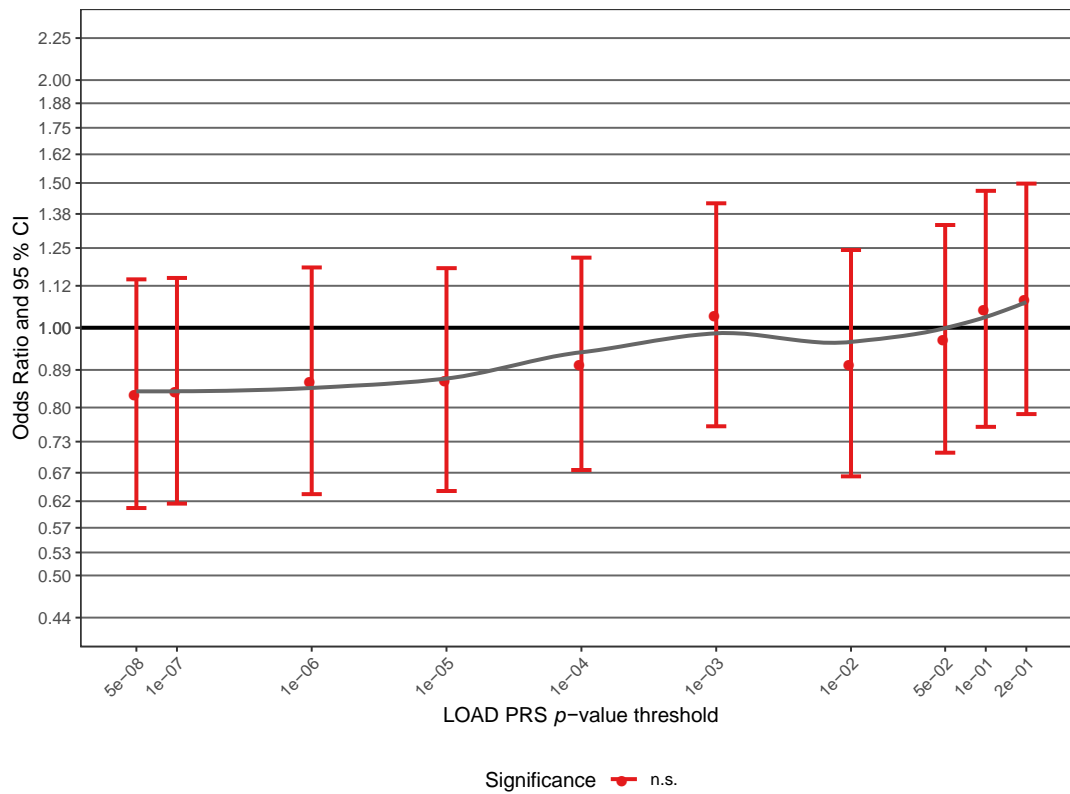

**Supplementary Fig. S11:** Population substructure analysis. Details regarding the generation of MDS components and the population substructure analysis are described above in the Supplementary Methods. The axes have been scaled to show standard deviations.

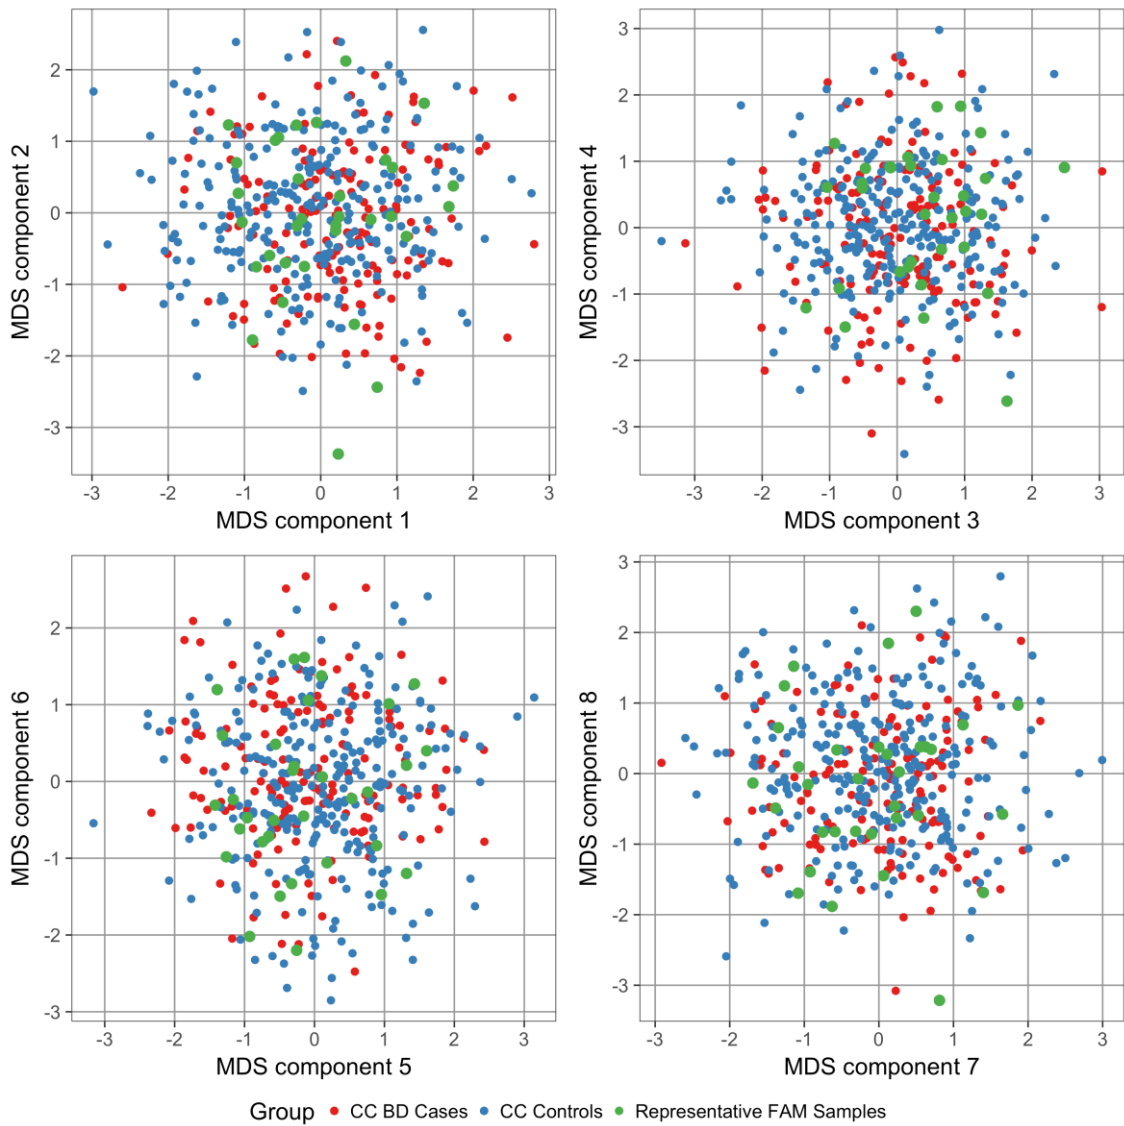

**Supplementary Fig. S12:** Association analysis comparing BD PRS in unrelated  $CC_{BD}$  cases and  $CC_{controls}$ . Details of the plot are described in the legend for Fig. 1. Covariate used: Sex. Full association test statistics including  $p$ -values are shown in Supplementary Table S11.

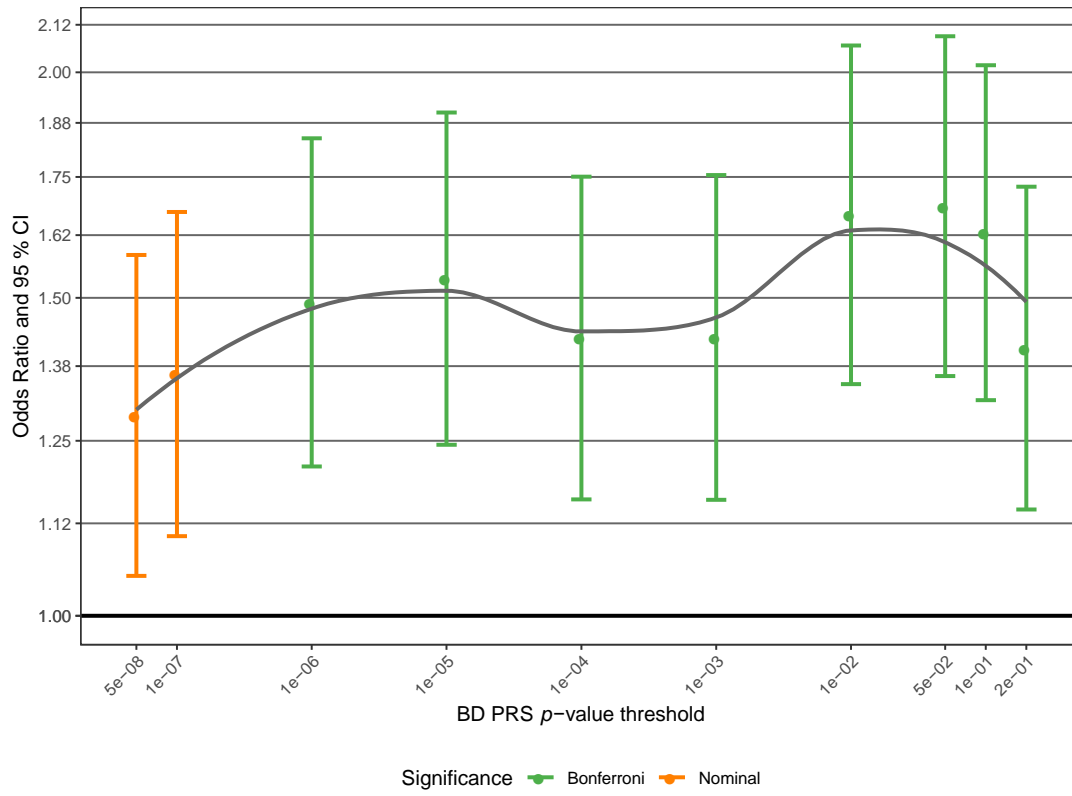

## **IGAP Supplementary Methods and Acknowledgments**

### **IGAP Methods for the LOAD GWAS**

International Genomics of Alzheimer's Project (IGAP) is a large two-stage study based upon genome-wide association studies (GWAS) on individuals of European ancestry. In stage 1, IGAP used genotyped and imputed data on 7,055,881 single nucleotide polymorphisms (SNPs) to meta-analyze four previously-published GWAS datasets consisting of 17,008 Alzheimer's disease cases and 37,154 controls (The European Alzheimer's disease Initiative – EADI, The Alzheimer Disease Genetics Consortium – ADGC, The Cohorts for Heart and Aging Research in Genomic Epidemiology consortium – CHARGE, The Genetic and Environmental Risk in AD consortium – GERAD). In stage 2, 11,632 SNPs were genotyped and tested for association in an independent set of 8,572 Alzheimer's disease cases and 11,312 controls. Finally, a meta-analysis was performed combining results from stages 1 & 2.

The present study used GWAS summary statistics from stage 1 for the calculation of PRS.

### **IGAP Acknowledgments**

We thank the International Genomics of Alzheimer's Project (IGAP) for providing summary results data for these analyses. The investigators within IGAP contributed to the design and implementation of IGAP and/or provided data but did not participate in analysis or writing of this report. IGAP was made possible by the generous participation of the control subjects, the patients, and their families. The i-Select chips was funded by the French National Foundation on Alzheimer's disease and related disorders. EADI was supported by the LABEX (laboratory of excellence program investment for the future) DISTALZ grant, Inserm, Institut Pasteur de Lille, Université de Lille 2 and the Lille University Hospital. GERAD was supported by the Medical Research Council (Grant n° 503480), Alzheimer's Research UK (Grant n° 503176), the Wellcome Trust (Grant n° 082604/2/07/Z) and German Federal Ministry of Education and Research (BMBF): Competence Network Dementia (CND) grant n° 01GI0102, 01GI0711, 01GI0420. CHARGE was partly supported by the NIH/NIA grant R01 AG033193 and the NIA AG081220 and AGES contract N01-AG-12100, the NHLBI grant R01 HL105756, the Icelandic Heart Association, and the Erasmus Medical Center and Erasmus University. ADGC was supported by the NIH/NIA grants: U01 AG032984, U24 AG021886, U01 AG016976, and the Alzheimer's Association grant ADGC-10-196728.

## **Authors of the Bipolar Disorder Working Group of the Psychiatric Genomics Consortium**

Eli A Stahl 1,2,3†  
Gerome Breen 4,5†  
Andreas J Forstner 6,7,8,9,10†  
Andrew McQuillin 11†  
Stephan Ripke 12,13,14†  
Vassily Trubetsky 13  
Manuel Mattheisen 15,16,17,18,19  
Yunpeng Wang 20,21  
Jonathan R I Coleman 4,5  
Héléna A Gaspar 4,5  
Christiaan A de Leeuw 22  
Stacy Steinberg 23  
Jennifer M Whitehead Pavlides 24  
Maciej Trzaskowski 25  
Tune H Pers 3,26  
Peter A Holmans 27  
Liam Abbott 12  
Esben Agerbo 19,28,29  
Huda Akil 30  
Diego Albani 31  
Ney Alliey-Rodriguez 32  
Thomas D Als 15,16,19  
Adebayo Anjorin 33  
Veneri Antilla 14  
Swapnil Awasthi 13  
Judith A Badner 34  
Marie Bækvad-Hansen 19,35  
Jack D Barchas 36  
Nicholas Bass 11  
Michael Bauer 37  
Richard Belliveau 12  
Sarah E Bergen 38  
Carsten Bøcker Pedersen 19,28,29  
Erlend Bøen 39  
Marco Boks 40  
James Boocock 41  
Monika Budde 42  
William Bunney 43  
Margit Burmeister 44  
Jonas Bybjerg-Grauholm 19,35  
William Byerley 45  
Miquel Casas 46,47,48,49  
Felecia Cerrato 12  
Pablo Cervantes 50  
Kimberly Chambert 12  
Alexander W Charney 2  
Danfeng Chen 12  
Claire Churchhouse 12,14  
Toni-Kim Clarke 51  
William Coryell 52  
David W Craig 53  
Cristiana Cruceanu 50,54  
Piotr M Czerski 55  
Anders M Dale 56,57,58,59  
Simone de Jong 4,5  
Franziska Degenhardt 8,9  
Jurgen Del-Favero 60  
J Raymond DePaulo 61  
Srdjan Djurovic 62,63  
Amanda L Dobbyn 1,2  
Ashley Dumont 12  
Torbjørn Elvsåshagen 64,65  
Valentina Escott-Price 27  
Chun Chieh Fan 59  
Sascha B Fischer 6,10  
Matthew Flickinger 66  
Tatiana M Foroud 67  
Liz Forty 27  
Josef Frank 68  
Christine Fraser 27  
Nelson B Freimer 69  
Louise Frisén 70,71,72  
Katrín Gade 42,73  
Diane Gage 12  
Julie Garnham 74  
Claudia Giambartolomei 41  
Marianne Giørtz Pedersen 19,28,29  
Jaqueline Goldstein 12  
Scott D Gordon 75  
Katherine Gordon-Smith 76  
Elaine K Green 77  
Melissa J Green 78  
Tiffany A Greenwood 58  
Jakob Grove 15,16,19,79  
Weihua Guan 80  
José Guzman Parra 81  
Marian L Hamshere 27  
Martin Hautzinger 82  
Urs Heilbronner 42  
Stefan Herms 6,8,9,10  
Maria Hipolito 83  
Per Hoffmann 6,8,9,10  
Dominic Holland 56,84  
Laura Huckins 1,2  
Stéphane Jamain 85,86  
Jessica S Johnson 1,2  
Anders Juréus 38  
Radhika Kandaswamy 4  
Robert Karlsson 38  
James L Kennedy 87,88,89,90  
Sarah Kittel-Schneider 91  
James A Knowles 92,93  
Manolis Kogevinas 94  
Anna C Koller 8,9

Ralph Kupka 95,96,97  
 Catharina Lavebratt 70  
 Jacob Lawrence 98  
 William B Lawson 83  
 Markus Leber 99  
 Phil H Lee 12,14,100  
 Shawn E Levy 101  
 Jun Z Li 102  
 Chunyu Liu 103  
 Susanne Lucae 104  
 Anna Maaser 8,9  
 Donald J MacIntyre 105,106  
 Pamela B Mahon 61,107  
 Wolfgang Maier 108  
 Lina Martinsson 71  
 Steve McCarroll 12,109  
 Peter McGuffin 4  
 Melvin G McInnis 110  
 James D McKay 111  
 Helena Medeiros 93  
 Sarah E Medland 75  
 Fan Meng 30,110  
 Lili Milani 112  
 Grant W Montgomery 25  
 Derek W Morris 113,114  
 Thomas W Mühleisen 6,115  
 Niamh Mullins 4  
 Hoang Nguyen 1,2  
 Caroline M Nievergelt 58,116  
 Annelie Nordin Adolfsson 117  
 Evaristus A Nwulia 83  
 Claire O'Donovan 74  
 Loes M Olde Loohuis 69  
 Anil P S Ori 69  
 Lilijana Oruc 118  
 Urban Ösby 119  
 Roy H Perlis 120,121  
 Amy Perry 76  
 Andrea Pfennig 37  
 James B Potash 61  
 Shaun M Purcell 2,107  
 Eline J Regeer 122  
 Andreas Reif 91  
 Céline S Reinbold 6,10  
 John P Rice 123  
 Alexander L Richards 27  
 Fabio Rivas 81  
 Margarita Rivera 4,124  
 Panos Roussos 1,2,125  
 Douglas M Ruderfer 126  
 Euijung Ryu 127  
 Cristina Sánchez-Mora 46,47,49  
 Alan F Schatzberg 128  
 William A Scheftner 129  
 Nicholas J Schork 130  
 Cynthia Shannon Weickert 78,131  
 Tatyana Shehktman 58  
 Paul D Shilling 58  
 Engilbert Sigurdsson 132  
 Claire Slaney 74  
 Olav B Smeland 56,133,134  
 Janet L Sobell 135  
 Christine Søholm Hansen 19,35  
 Anne T Spijker 136  
 David St Clair 137  
 Michael Steffens 138  
 John S Strauss 89,139  
 Fabian Streit 68  
 Jana Strohmaier 68  
 Szabolcs Szelinger 140  
 Robert C Thompson 110  
 Thorgerir E Thorgerirsson 23  
 Jens Treutlein 68  
 Helmut Vedder 141  
 Weiqing Wang 1,2  
 Stanley J Watson 110  
 Thomas W Weickert 78,131  
 Stephanie H Witt 68  
 Simon Xi 142  
 Wei Xu 143,144  
 Allan H Young 145  
 Peter Zandi 146  
 Peng Zhang 147  
 Sebastian Zollner 110  
 Rolf Adolfsson 117  
 Ingrid Agartz 17,39,148  
 Martin Alda 74,149  
 Lena Backlund 71  
 Bernhard T Baune 150  
 Frank Bellivier 151,152,153,154  
 Wade H Berrettini 155  
 Joanna M Biernacka 127  
 Douglas H R Blackwood 51  
 Michael Boehnke 66  
 Anders D Børghlum 15,16,19  
 Aiden Corvin 114  
 Nicholas Craddock 27  
 Mark J Daly 12,14  
 Udo Dannlowski 156  
 Tõnu Esko 3,109,112,157  
 Bruno Etain 151,153,154,158  
 Mark Frye 159  
 Janice M Fullerton 131,160  
 Elliot S Gershon 32,161  
 Michael Gill 114  
 Fernando Goes 61  
 Maria Grigoriu-Serbanescu 162  
 Joanna Hauser 55  
 David M Hougaard 19,35  
 Christina M Hultman 38

Ian Jones 27  
Lisa A Jones 76  
René S Kahn 2,40  
George Kirov 27  
Mikael Landén 38,163  
Marion Leboyer 86,151,164  
Cathryn M Lewis 4,5,165  
Qingqin S Li 166  
Jolanta Lissowska 167  
Nicholas G Martin 75,168  
Fermin Mayoral 81  
Susan L McElroy 169  
Andrew M McIntosh 51,170  
Francis J McMahan 171  
Ingrid Melle 172,173  
Andres Metspalu 112,174  
Philip B Mitchell 78  
Gunnar Morken 175,176  
Ole Mors 19,177  
Preben Bo Mortensen 15,19,28,29  
Bertram Müller-Myhsok 54,178,179  
Richard M Myers 101  
Benjamin M Neale 3,12,14  
Vishwajit Nimgaonkar 180  
Merete Nordentoft 19,181  
Markus M Nöthen 8,9  
Michael C O'Donovan 27  
Ketil J Oedegaard 182,183  
Michael J Owen 27  
Sara A Paciga 184  
Carlos Pato 93,185  
Michele T Pato 93

Danielle Posthuma 22,186  
Josep Antoni Ramos-Quiroga 46,47,48,49  
Marta Ribasés 46,47,49  
Marcella Rietschel 68  
Guy A Rouleau 187,188  
Martin Schalling 70  
Peter R Schofield 131,160  
Thomas G Schulze 42,61,68,73,171  
Alessandro Serretti 189  
Jordan W Smoller 12,190,191  
Hreinn Stefansson 23  
Kari Stefansson 23,192  
Eystein Stordal 193,194  
Patrick F Sullivan 38,195,196  
Gustavo Turecki 197  
Arne E Vaaler 198  
Eduard Vieta 199  
John B Vincent 139  
Thomas Werge 19,200,201  
John I Nurnberger 202  
Naomi R Wray 24,25  
Arianna Di Florio 27,196  
Howard J Edenberg 203  
Sven Cichon 6,8,10,115  
Roel A Ophoff 40,41,69  
Laura J Scott 66  
Ole A Andreassen 133,134  
John Kelsoe 58\*  
Pamela Sklar 1,2\*^  
† Equal contribution, \* Co-last authors  
^ deceased.

1. Department of Genetics and Genomic Sciences, Icahn School of Medicine at Mount Sinai, New York, NY, US
2. Department of Psychiatry, Icahn School of Medicine at Mount Sinai, New York, NY, US
3. Medical and Population Genetics, Broad Institute, Cambridge, MA, US
4. MRC Social, Genetic and Developmental Psychiatry Centre, King's College London, London, GB
5. NIHR BRC for Mental Health, King's College London, London, GB
6. Human Genomics Research Group, Department of Biomedicine, University of Basel, Basel, CH
7. Department of Psychiatry (UPK), University of Basel, Basel, CH
8. Institute of Human Genetics, University of Bonn, School of Medicine & University Hospital Bonn, Bonn, DE
9. Department of Genomics, Life&Brain Center, University of Bonn, Bonn, DE
10. Institute of Medical Genetics and Pathology, University Hospital Basel, Basel, CH
11. Division of Psychiatry, University College London, London, GB
12. Stanley Center for Psychiatric Research, Broad Institute, Cambridge, MA, US
13. Department of Psychiatry and Psychotherapy, Charité - Universitätsmedizin, Berlin, DE
14. Analytic and Translational Genetics Unit, Massachusetts General Hospital, Boston, MA, US
15. iSEQ, Center for Integrative Sequencing, Aarhus University, Aarhus, DK
16. Department of Biomedicine - Human Genetics, Aarhus University, Aarhus, DK
17. Department of Clinical Neuroscience, Centre for Psychiatry Research, Karolinska Institutet, Stockholm, SE
18. Department of Psychiatry, Psychosomatics and Psychotherapy, Center of Mental Health, University Hospital Würzburg, Würzburg, DE
19. iPSYCH, The Lundbeck Foundation Initiative for Integrative Psychiatric Research, DK
20. Institute of Biological Psychiatry, Mental Health Centre Sct. Hans, Copenhagen, DK
21. Institute of Clinical Medicine, University of Oslo, Oslo, NO
22. Department of Complex Trait Genetics, Center for Neurogenomics and Cognitive Research, Amsterdam Neuroscience, Vrije Universiteit Amsterdam, Amsterdam, NL
23. deCODE Genetics / Amgen, Reykjavik, IS
24. Queensland Brain Institute, The University of Queensland, Brisbane, QLD, AU
25. Institute for Molecular Bioscience, The University of Queensland, Brisbane, QLD, AU
26. Division of Endocrinology and Center for Basic and Translational Obesity Research, Boston Children's Hospital, Boston, MA, US
27. Medical Research Council Centre for Neuropsychiatric Genetics and Genomics, Division of Psychological Medicine and Clinical Neurosciences, Cardiff University, Cardiff, GB
28. National Centre for Register-Based Research, Aarhus University, Aarhus, DK
29. Centre for Integrated Register-based Research, Aarhus University, Aarhus, DK
30. Molecular & Behavioral Neuroscience Institute, University of Michigan, Ann Arbor, MI, US
31. NEUROSCIENCE, Istituto Di Ricerche Farmacologiche Mario Negri, Milano, IT
32. Department of Psychiatry and Behavioral Neuroscience, University of Chicago, Chicago, IL, US
33. Psychiatry, Berkshire Healthcare NHS Foundation Trust, Bracknell, GB
34. Psychiatry, Rush University Medical Center, Chicago, IL, US
35. Center for Neonatal Screening, Department for Congenital Disorders, Statens Serum Institut, Copenhagen, DK



36. Department of Psychiatry, Weill Cornell Medical College, New York, NY, US
37. Department of Psychiatry and Psychotherapy, University Hospital Carl Gustav Carus, Technische Universität Dresden, Dresden, DE
38. Department of Medical Epidemiology and Biostatistics, Karolinska Institutet, Stockholm, SE
39. Department of Psychiatric Research, Diakonhjemmet Hospital, Oslo, NO
40. Psychiatry, UMC Utrecht Hersencentrum Rudolf Magnus, Utrecht, NL
41. Human Genetics, University of California Los Angeles, Los Angeles, CA, US
42. Institute of Psychiatric Phenomics and Genomics (IPPG), University Hospital, LMU Munich, Munich, DE
43. Department of Psychiatry and Human Behavior, University of California, Irvine, Irvine, CA, US
44. Molecular & Behavioral Neuroscience Institute and Department of Computational Medicine & Bioinformatics, University of Michigan, Ann Arbor, MI, US
45. Psychiatry, University of California San Francisco, San Francisco, CA, US
46. Instituto de Salud Carlos III, Biomedical Network Research Centre on Mental Health (CIBERSAM), Madrid, ES
47. Department of Psychiatry, Hospital Universitari Vall d'Hebron, Barcelona, ES
48. Department of Psychiatry and Forensic Medicine, Universitat Autònoma de Barcelona, Barcelona, ES
49. Psychiatric Genetics Unit, Group of Psychiatry Mental Health and Addictions, Vall d'Hebron Research Institut (VHIR), Universitat Autònoma de Barcelona, Barcelona, ES
50. Department of Psychiatry, Mood Disorders Program, McGill University Health Center, Montreal, QC, CA
51. Division of Psychiatry, University of Edinburgh, Edinburgh, GB
52. University of Iowa Hospitals and Clinics, Iowa City, IA, US
53. Translational Genomics, USC, Phoenix, AZ, US
54. Department of Translational Research in Psychiatry, Max Planck Institute of Psychiatry, Munich, DE
55. Department of Psychiatry, Laboratory of Psychiatric Genetics, Poznan University of Medical Sciences, Poznan, PL
56. Department of Neurosciences, University of California San Diego, La Jolla, CA, US
57. Department of Radiology, University of California San Diego, La Jolla, CA, US
58. Department of Psychiatry, University of California San Diego, La Jolla, CA, US
59. Department of Cognitive Science, University of California San Diego, La Jolla, CA, US
60. Applied Molecular Genomics Unit, VIB Department of Molecular Genetics, University of Antwerp, Antwerp, Belgium
61. Department of Psychiatry and Behavioral Sciences, Johns Hopkins University School of Medicine, Baltimore, MD, US
62. Department of Medical Genetics, Oslo University Hospital Ullevål, Oslo, NO
63. NORMENT, KG Jebsen Centre for Psychosis Research, Department of Clinical Science, University of Bergen, Bergen, NO
64. Department of Neurology, Oslo University Hospital, Oslo, NO
65. NORMENT, KG Jebsen Centre for Psychosis Research, Oslo University Hospital, Oslo, NO
66. Center for Statistical Genetics and Department of Biostatistics, University of Michigan, Ann Arbor, MI, US
67. Department of Medical & Molecular Genetics, Indiana University, Indianapolis, IN, US
68. Department of Genetic Epidemiology in Psychiatry, Central Institute of Mental Health, Medical Faculty Mannheim, Heidelberg University, Mannheim, DE

69. Center for Neurobehavioral Genetics, University of California Los Angeles, Los Angeles, CA, US
70. Department of Molecular Medicine and Surgery, Karolinska Institutet and Center for Molecular Medicine, Karolinska University Hospital, Stockholm, SE
71. Department of Clinical Neuroscience, Karolinska Institutet and Center for Molecular Medicine, Karolinska University Hospital, Stockholm, SE
72. Child and Adolescent Psychiatry Research Center, Stockholm, SE
73. Department of Psychiatry and Psychotherapy, University Medical Center Göttingen, Göttingen, DE
74. Department of Psychiatry, Dalhousie University, Halifax, NS, CA
75. Genetics and Computational Biology, QIMR Berghofer Medical Research Institute, Brisbane, QLD, AU
76. Department of Psychological Medicine, University of Worcester, Worcester, GB
77. School of Biomedical and Healthcare Sciences, Plymouth University Peninsula Schools of Medicine and Dentistry, Plymouth, GB
78. School of Psychiatry, University of New South Wales, Sydney, NSW, AU
79. Bioinformatics Research Centre, Aarhus University, Aarhus, DK
80. Biostatistics, University of Minnesota System, Minneapolis, MN, US
81. Mental Health Department, University Regional Hospital, Biomedicine Institute (IBIMA), Málaga, ES
82. Department of Psychology, Eberhard Karls Universität Tübingen, Tübingen, DE
83. Department of Psychiatry and Behavioral Sciences, Howard University Hospital, Washington, DC, US
84. Center for Multimodal Imaging and Genetics, University of California San Diego, La Jolla, CA, US
85. Psychiatrie Translationnelle, Inserm U955, Créteil, FR
86. Faculté de Médecine, Université Paris Est, Créteil, FR
87. Campbell Family Mental Health Research Institute, Centre for Addiction and Mental Health, Toronto, ON, CA
88. Neurogenetics Section, Centre for Addiction and Mental Health, Toronto, ON, CA
89. Department of Psychiatry, University of Toronto, Toronto, ON, CA
90. Institute of Medical Sciences, University of Toronto, Toronto, ON, CA
91. Department of Psychiatry, Psychosomatic Medicine and Psychotherapy, University Hospital Frankfurt, Frankfurt am Main, DE
92. Cell Biology, SUNY Downstate Medical Center College of Medicine, Brooklyn, NY, US
93. Institute for Genomic Health, SUNY Downstate Medical Center College of Medicine, Brooklyn, NY, US
94. ISGlobal, Barcelona, ES
95. Psychiatry, Altrecht, Utrecht, NL
96. Psychiatry, GGZ inGeest, Amsterdam, NL
97. Psychiatry, VU medisch centrum, Amsterdam, NL
98. Psychiatry, North East London NHS Foundation Trust, Ilford, GB
99. Clinic for Psychiatry and Psychotherapy, University Hospital Cologne, Cologne, DE
100. Psychiatric and Neurodevelopmental Genetics Unit, Massachusetts General Hospital, Boston, MA, US
101. HudsonAlpha Institute for Biotechnology, Huntsville, AL, US
102. Department of Human Genetics, University of Michigan, Ann Arbor, MI, US
103. Psychiatry, University of Illinois at Chicago College of Medicine, Chicago, IL, US
104. Max Planck Institute of Psychiatry, Munich, DE
105. Mental Health, NHS 24, Glasgow, GB
106. Division of Psychiatry, Centre for Clinical Brain Sciences, University of Edinburgh, Edinburgh, GB
107. Psychiatry, Brigham and Women's Hospital, Boston, MA, US

108. Department of Psychiatry and Psychotherapy, University of Bonn, Bonn, DE
109. Department of Genetics, Harvard Medical School, Boston, MA, US
110. Department of Psychiatry, University of Michigan, Ann Arbor, MI, US
111. Genetic Cancer Susceptibility Group, International Agency for Research on Cancer, Lyon, FR
112. Estonian Genome Center, University of Tartu, Tartu, EE
113. Discipline of Biochemistry, Neuroimaging and Cognitive Genomics (NICOG) Centre, National University of Ireland, Galway, Galway, IE
114. Neuropsychiatric Genetics Research Group, Dept of Psychiatry and Trinity Translational Medicine Institute, Trinity College Dublin, Dublin, IE
115. Institute of Neuroscience and Medicine (INM-1), Research Centre Jülich, Jülich, DE
116. Research/Psychiatry, Veterans Affairs San Diego Healthcare System, San Diego, CA, US
117. Department of Clinical Sciences, Psychiatry, Umeå University Medical Faculty, Umeå, SE
118. Department of Clinical Psychiatry, Psychiatry Clinic, Clinical Center University of Sarajevo, Sarajevo, BA
119. Department of Neurobiology, Care sciences, and Society, Karolinska Institutet and Center for Molecular Medicine, Karolinska University Hospital, Stockholm, SE
120. Psychiatry, Harvard Medical School, Boston, MA, US
121. Division of Clinical Research, Massachusetts General Hospital, Boston, MA, US
122. Outpatient Clinic for Bipolar Disorder, Altrecht, Utrecht, NL
123. Department of Psychiatry, Washington University in Saint Louis, Saint Louis, MO, US
124. Department of Biochemistry and Molecular Biology II, Institute of Neurosciences, Center for Biomedical Research, University of Granada, Granada, ES
125. Department of Neuroscience, Icahn School of Medicine at Mount Sinai, New York, NY, US
126. Medicine, Psychiatry, Biomedical Informatics, Vanderbilt University Medical Center, Nashville, TN, US
127. Department of Health Sciences Research, Mayo Clinic, Rochester, MN, US
128. Psychiatry and Behavioral Sciences, Stanford University School of Medicine, Stanford, CA, US
129. Rush University Medical Center, Chicago, IL, US
130. Scripps Translational Science Institute, La Jolla, CA, US
131. Neuroscience Research Australia, Sydney, NSW, AU
132. Faculty of Medicine, Department of Psychiatry, School of Health Sciences, University of Iceland, Reykjavik, IS
133. Div Mental Health and Addiction, Oslo University Hospital, Oslo, NO
134. NORMENT, University of Oslo, Oslo, NO
135. Psychiatry and the Behavioral Sciences, University of Southern California, Los Angeles, CA, US
136. Mood Disorders, PsyQ, Rotterdam, NL
137. Institute for Medical Sciences, University of Aberdeen, Aberdeen, UK
138. Research Division, Federal Institute for Drugs and Medical Devices (BfArM), Bonn, DE
139. Centre for Addiction and Mental Health, Toronto, ON, CA
140. Neurogenomics, TGen, Los Angeles, AZ, US
141. Psychiatry, Psychiatrisches Zentrum Nordbaden, Wiesloch, DE
142. Computational Sciences Center of Emphasis, Pfizer Global Research and Development, Cambridge, MA, US
143. Department of Biostatistics, Princess Margaret Cancer Centre, Toronto, ON, CA
144. Dalla Lana School of Public Health, University of Toronto, Toronto, ON, CA

145. Psychological Medicine, Institute of Psychiatry, Psychology & Neuroscience, King's College London, London, GB
146. Department of Mental Health, Johns Hopkins University Bloomberg School of Public Health, Baltimore, MD, US
147. Institute of Genetic Medicine, Johns Hopkins University School of Medicine, Baltimore, MD, US
148. NORMENT, KG Jebsen Centre for Psychosis Research, Division of Mental Health and Addiction, Institute of Clinical Medicine and Diakonhjemmet Hospital, University of Oslo, Oslo, NO
149. National Institute of Mental Health, Klecany, CZ
150. Discipline of Psychiatry, University of Adelaide, Adelaide, SA, AU
151. Department of Psychiatry and Addiction Medicine, Assistance Publique - Hôpitaux de Paris, Paris, FR
152. Paris Bipolar and TRD Expert Centres, FondaMental Foundation, Paris, FR
153. UMR-S1144 Team 1: Biomarkers of relapse and therapeutic response in addiction and mood disorders, INSERM, Paris, FR
154. Psychiatry, Université Paris Diderot, Paris, FR
155. Psychiatry, University of Pennsylvania, Philadelphia, PA, US
156. Department of Psychiatry, University of Münster, Münster, DE
157. Division of Endocrinology, Children's Hospital Boston, Boston, MA, US
158. Centre for Affective Disorders, Institute of Psychiatry, Psychology and Neuroscience, London, GB
159. Department of Psychiatry & Psychology, Mayo Clinic, Rochester, MN, US
160. School of Medical Sciences, University of New South Wales, Sydney, NSW, AU
161. Department of Human Genetics, University of Chicago, Chicago, IL, US
162. Biometric Psychiatric Genetics Research Unit, Alexandru Obregia Clinical Psychiatric Hospital, Bucharest, RO
163. Institute of Neuroscience and Physiology, University of Gothenburg, Gothenburg, SE
164. INSERM, Paris, FR
165. Department of Medical & Molecular Genetics, King's College London, London, GB
166. Neuroscience Therapeutic Area, Janssen Research and Development, LLC, Titusville, NJ, US
167. Cancer Epidemiology and Prevention, M. Sklodowska-Curie Cancer Center and Institute of Oncology, Warsaw, PL
168. School of Psychology, The University of Queensland, Brisbane, QLD, AU
169. Research Institute, Lindner Center of HOPE, Mason, OH, US
170. Centre for Cognitive Ageing and Cognitive Epidemiology, University of Edinburgh, Edinburgh, GB
171. Human Genetics Branch, Intramural Research Program, National Institute of Mental Health, Bethesda, MD, US
172. Division of Mental Health and Addiction, Oslo University Hospital, Oslo, NO
173. Division of Mental Health and Addiction, University of Oslo, Institute of Clinical Medicine, Oslo, NO
174. Institute of Molecular and Cell Biology, University of Tartu, Tartu, EE
175. Mental Health, Faculty of Medicine and Health Sciences, Norwegian University of Science and Technology - NTNU, Trondheim, NO
176. Psychiatry, St Olavs University Hospital, Trondheim, NO
177. Psychosis Research Unit, Aarhus University Hospital, Risskov, DK
178. Munich Cluster for Systems Neurology (SyNergy), Munich, DE
179. University of Liverpool, Liverpool, GB
180. Psychiatry and Human Genetics, University of Pittsburgh, Pittsburgh, PA, US
181. Mental Health Services in the Capital Region of Denmark, Mental Health Center Copenhagen, University of Copenhagen, Copenhagen, DK

182. Division of Psychiatry, Haukeland Universitetssjukehus, Bergen, NO
183. Faculty of Medicine and Dentistry, University of Bergen, Bergen, NO
184. Human Genetics and Computational Biomedicine, Pfizer Global Research and Development, Groton, CT, US
185. College of Medicine Institute for Genomic Health, SUNY Downstate Medical Center College of Medicine, Brooklyn, NY, US
186. Department of Clinical Genetics, Amsterdam Neuroscience, Vrije Universiteit Medical Center, Amsterdam, NL
187. Department of Neurology and Neurosurgery, McGill University, Faculty of Medicine, Montreal, QC, CA
188. Montreal Neurological Institute and Hospital, Montreal, QC, CA
189. Department of Biomedical and NeuroMotor Sciences, University of Bologna, Bologna, IT
190. Department of Psychiatry, Massachusetts General Hospital, Boston, MA, US
191. Psychiatric and Neurodevelopmental Genetics Unit (PNGU), Massachusetts General Hospital, Boston, MA, US
192. Faculty of Medicine, University of Iceland, Reykjavik, IS
193. Department of Psychiatry, Hospital Namsos, Namsos, NO
194. Department of Neuroscience, Norges Teknisk Naturvitenskapelige Universitet Fakultet for naturvitenskap og teknologi, Trondheim, NO
195. Department of Genetics, University of North Carolina at Chapel Hill, Chapel Hill, NC, US
196. Department of Psychiatry, University of North Carolina at Chapel Hill, Chapel Hill, NC, US
197. Department of Psychiatry, McGill University, Montreal, QC, CA
198. Dept of Psychiatry, Sankt Olavs Hospital Universitetssykehuset i Trondheim, Trondheim, NO
199. Clinical Institute of Neuroscience, Hospital Clinic, University of Barcelona, IDIBAPS, CIBERSAM, Barcelona, ES
200. Institute of Biological Psychiatry, MHC Sct. Hans, Mental Health Services Copenhagen, Roskilde, DK
201. Department of Clinical Medicine, University of Copenhagen, Copenhagen, DK
202. Psychiatry, Indiana University School of Medicine, Indianapolis, IN, US
203. Biochemistry and Molecular Biology, Indiana University School of Medicine, Indianapolis, IN, US

## **Authors of the Major Depressive Disorder Working Group of the Psychiatric Genomics Consortium**

Naomi R Wray\* 1, 2  
Stephan Ripke\* 3, 4, 5  
Manuel Mattheisen\* 6, 7, 8  
Maciej Trzaskowski\* 1  
Enda M Byrne 1  
Abdel Abdellaoui 9  
Mark J Adams 10  
Esben Agerbo 11, 12, 13  
Tracy M Air 14  
Till F M Andlauer 15, 16  
Silviu-Alin Bacanu 17  
Marie Bækvad-Hansen 13, 18  
Aartjan T F Beekman 19  
Tim B Bigdeli 17, 20  
Elisabeth B Binder 15, 21  
Julien Bryois 22  
Henriette N Buttenschøn 13, 23, 24  
Jonas Bybjerg-Grauholm 13, 18  
Na Cai 25, 26  
Enrique Castelao 27  
Jane Hvarregaard Christensen 8, 13, 24  
Toni-Kim Clarke 10  
Jonathan R I Coleman 28  
Lucía Colodro-Conde 29  
Baptiste Couvy-Duchesne 2, 30  
Nick Craddock 31  
Gregory E Crawford 32, 33  
Gail Davies 34  
Ian J Deary 34  
Franziska Degenhardt 35  
Eske M Derks 29  
Nese Direk 36, 37  
Conor V Dolan 9  
Erin C Dunn 38, 39, 40  
Thalia C Eley 28  
Valentina Escott-Price 41  
Farnush Farhadi Hassan Kiadeh 42  
Hilary K Finucane 43, 44  
Jerome C Foo 45  
Andreas J Forstner 35, 46, 47, 48  
Josef Frank 45  
Hélène A Gaspar 28  
Michael Gill 49  
Fernando S Goes 50  
Scott D Gordon 29  
Jakob Grove 8, 13, 24, 51  
Lynsey S Hall 10, 52  
Christine Søholm Hansen 13, 18  
Thomas F Hansen 53, 54, 55  
Stefan Herms 35, 47  
Ian B Hickie 56  
Per Hoffmann 35, 47  
Georg Homuth 57  
Carsten Horn 58  
Jouke-Jan Hottenga 9  
David M Hougaard 13, 18  
David M Howard 10, 28  
Marcus Ising 59  
Rick Jansen 19  
Ian Jones 60  
Lisa A Jones 61  
Eric Jorgenson 62  
James A Knowles 63  
Isaac S Kohane 64, 65, 66  
Julia Kraft 4  
Warren W. Kretschmar 67  
Zoltán Kutalik 68, 69  
Yihan Li 67  
Penelope A Lind 29  
Donald J MacIntyre 70, 71  
Dean F MacKinnon 50  
Robert M Maier 2  
Wolfgang Maier 72  
Jonathan Marchini 73  
Hamdi Mbarek 9  
Patrick McGrath 74  
Peter McGuffin 28  
Sarah E Medland 29  
Divya Mehta 2, 75  
Christel M Middeldorp 9, 76, 77  
Evelin Mihailov 78  
Yuri Milaneschi 19  
Lili Milani 78  
Francis M Mondimore 50  
Grant W Montgomery 1  
Sara Mostafavi 79, 80  
Niamh Mullins 28  
Matthias Nauck 81, 82  
Bernard Ng 80  
Michel G Nivard 9  
Dale R Nyholt 83  
Paul F O'Reilly 28  
Hogni Oskarsson 84  
Michael J Owen 60  
Jodie N Painter 29  
Carsten Bøcker Pedersen 11, 12, 13  
Marianne Giørtz Pedersen 11, 12, 13  
Roseann E Peterson 17, 85  
Erik Pettersson 22  
Wouter J Peyrot 19  
Giorgio Pistis 27  
Danielle Posthuma 86, 87  
Jorge A Quiroz 88

Per Qvist 8, 13, 24  
 John P Rice 89  
 Brien P. Riley 17  
 Margarita Rivera 28, 90  
 Saira Saeed Mirza 36  
 Robert Schoevers 91  
 Eva C Schulte 92, 93  
 Ling Shen 62  
 Jianxin Shi 94  
 Stanley I Shyn 95  
 Engilbert Sigurdsson 96  
 Grant C B Sinnamon 97  
 Johannes H Smit 19  
 Daniel J Smith 98  
 Hreinn Stefansson 99  
 Stacy Steinberg 99  
 Fabian Streit 45  
 Jana Strohmaier 45  
 Katherine E Tansey 100  
 Henning Teismann 101  
 Alexander Teumer 102  
 Wesley Thompson 13, 54, 103, 104  
 Pippa A Thomson 105  
 Thorgeir E Thorgeirsson 99  
 Matthew Traylor 106  
 Jens Treutlein 45  
 Vassily Trubetskoy 4  
 André G Uitterlinden 107  
 Daniel Umbricht 108  
 Sandra Van der Auwera 109  
 Albert M van Hemert 110  
 Alexander Viktorin 22  
 Peter M Visscher 1, 2  
 Yunpeng Wang 13, 54, 104  
 Bradley T. Webb 111  
 Shantel Marie Weinsheimer 13, 54  
 Jürgen Wellmann 101  
 Gonneke Willemsen 9  
 Stephanie H Witt 45  
 Yang Wu 1  
 Hualin S Xi 112  
 Jian Yang 2, 113  
 Futao Zhang 1  
 Volker Arolt 114  
 Bernhard T Baune 115, 116, 117  
 Klaus Berger 101  
 Dorret I Boomsma 9  
 Sven Cichon 35, 47, 118, 119  
 Udo Dannlowski 114  
 EJC de Geus 9, 120  
 J Raymond DePaulo 50  
 Enrico Domenici 121  
 Katharina Domschke 122, 123  
 Tõnu Esko 5, 78  
 Hans J Grabe 109  
 Steven P Hamilton 124  
 Caroline Hayward 125  
 Andrew C Heath 89  
 Kenneth S Kendler 17  
 Stefan Kloiber 59, 126, 127  
 Glyn Lewis 128  
 Qingqin S Li 129  
 Susanne Lucae 59  
 Pamela AF Madden 89  
 Patrik K Magnusson 22  
 Nicholas G Martin 29  
 Andrew M McIntosh 10, 34  
 Andres Metspalu 78, 130  
 Ole Mors 13, 131  
 Preben Bo Mortensen 11, 12, 13, 24  
 Bertram Müller-Myhsok 15, 132, 133  
 Merete Nordentoft 13, 134  
 Markus M Nöthen 35  
 Michael C O'Donovan 60  
 Sara A Paciga 135  
 Nancy L Pedersen 22  
 Brenda WJH Penninx 19  
 Roy H Perlis 38, 136  
 David J Porteous 105  
 James B Potash 137  
 Martin Preisig 27  
 Marcella Rietschel 45  
 Catherine Schaefer 62  
 Thomas G Schulze 45, 93, 138, 139, 140  
 Jordan W Smoller 38, 39, 40  
 Kari Stefansson 99, 141  
 Henning Tiemeier 36, 142, 143  
 Rudolf Uher 144  
 Henry Völzke 102  
 Myrna M Weissman 74, 145  
 Thomas Werge 13, 54, 146  
 Cathryn M Lewis\* 28, 147  
 Douglas F Levinson\* 148  
 Gerome Breen\* 28, 149  
 Anders D Børglum\* 8, 13, 24  
 Patrick F Sullivan\* 22, 150, 151  
 \* equal contribution / joint direction

1. Institute for Molecular Bioscience, The University of Queensland, Brisbane, QLD, AU
2. Queensland Brain Institute, The University of Queensland, Brisbane, QLD, AU
3. Analytic and Translational Genetics Unit, Massachusetts General Hospital, Boston, MA, US
4. Department of Psychiatry and Psychotherapy, Universitätsmedizin Berlin Campus Charité Mitte, Berlin, DE
5. Medical and Population Genetics, Broad Institute, Cambridge, MA, US
6. Department of Psychiatry, Psychosomatics and Psychotherapy, University of Würzburg, Würzburg, DE
7. Centre for Psychiatry Research, Department of Clinical Neuroscience, Karolinska Institutet, Stockholm, SE
8. Department of Biomedicine, Aarhus University, Aarhus, DK
9. Dept of Biological Psychology & EMGO+ Institute for Health and Care Research, Vrije Universiteit Amsterdam, Amsterdam, NL
10. Division of Psychiatry, University of Edinburgh, Edinburgh, GB
11. Centre for Integrated Register-based Research, Aarhus University, Aarhus, DK
12. National Centre for Register-Based Research, Aarhus University, Aarhus, DK
13. iPSYCH, The Lundbeck Foundation Initiative for Integrative Psychiatric Research,, DK
14. Discipline of Psychiatry, University of Adelaide, Adelaide, SA, AU
15. Department of Translational Research in Psychiatry, Max Planck Institute of Psychiatry, Munich, DE
16. Department of Neurology, Klinikum rechts der Isar, Technical University of Munich, Munich, DE
17. Department of Psychiatry, Virginia Commonwealth University, Richmond, VA, US
18. Center for Neonatal Screening, Department for Congenital Disorders, Statens Serum Institut, Copenhagen, DK
19. Department of Psychiatry, Vrije Universiteit Medical Center and GGZ inGeest, Amsterdam, NL
20. Virginia Institute for Psychiatric and Behavior Genetics, Richmond, VA, US
21. Department of Psychiatry and Behavioral Sciences, Emory University School of Medicine, Atlanta, GA, US
22. Department of Medical Epidemiology and Biostatistics, Karolinska Institutet, Stockholm, SE
23. Department of Clinical Medicine, Translational Neuropsychiatry Unit, Aarhus University, Aarhus, DK
24. iSEQ, Centre for Integrative Sequencing, Aarhus University, Aarhus, DK
25. Human Genetics, Wellcome Trust Sanger Institute, Cambridge, GB
26. Statistical genomics and systems genetics, European Bioinformatics Institute (EMBL-EBI), Cambridge, GB
27. Department of Psychiatry, Lausanne University Hospital and University of Lausanne, Lausanne, CH
28. Social, Genetic and Developmental Psychiatry Centre, King's College London, London, GB
29. Genetics and Computational Biology, QIMR Berghofer Medical Research Institute, Brisbane, QLD, AU
30. Centre for Advanced Imaging, The University of Queensland, Brisbane, QLD, AU
31. Psychological Medicine, Cardiff University, Cardiff, GB
32. Center for Genomic and Computational Biology, Duke University, Durham, NC, US
33. Department of Pediatrics, Division of Medical Genetics, Duke University, Durham, NC, US



34. Centre for Cognitive Ageing and Cognitive Epidemiology, University of Edinburgh, Edinburgh, GB
35. Institute of Human Genetics, University of Bonn, School of Medicine & University Hospital Bonn, Bonn, DE
36. Epidemiology, Erasmus MC, Rotterdam, Zuid-Holland, NL
37. Psychiatry, Dokuz Eylul University School Of Medicine, Izmir, TR
38. Department of Psychiatry, Massachusetts General Hospital, Boston, MA, US
39. Psychiatric and Neurodevelopmental Genetics Unit (PNGU), Massachusetts General Hospital, Boston, MA, US
40. Stanley Center for Psychiatric Research, Broad Institute, Cambridge, MA, US
41. Neuroscience and Mental Health, Cardiff University, Cardiff, GB
42. Bioinformatics, University of British Columbia, Vancouver, BC, CA
43. Department of Epidemiology, Harvard T.H. Chan School of Public Health, Boston, MA, US
44. Department of Mathematics, Massachusetts Institute of Technology, Cambridge, MA, US
45. Department of Genetic Epidemiology in Psychiatry, Central Institute of Mental Health, Medical Faculty Mannheim, Heidelberg University, Mannheim, Baden-Württemberg, DE
46. Department of Psychiatry (UPK), University of Basel, Basel, CH
47. Department of Biomedicine, University of Basel, Basel, CH
48. Centre for Human Genetics, University of Marburg, Marburg, DE
49. Department of Psychiatry, Trinity College Dublin, Dublin, IE
50. Psychiatry & Behavioral Sciences, Johns Hopkins University, Baltimore, MD, US
51. Bioinformatics Research Centre, Aarhus University, Aarhus, DK
52. Institute of Genetic Medicine, Newcastle University, Newcastle upon Tyne, GB
53. Danish Headache Centre, Department of Neurology, Rigshospitalet, Glostrup, DK
54. Institute of Biological Psychiatry, Mental Health Center Sct. Hans, Mental Health Services Capital Region of Denmark, Copenhagen, DK
55. iPSYCH, The Lundbeck Foundation Initiative for Psychiatric Research, Copenhagen, DK
56. Brain and Mind Centre, University of Sydney, Sydney, NSW, AU
57. Interfaculty Institute for Genetics and Functional Genomics, Department of Functional Genomics, University Medicine and Ernst Moritz Arndt University Greifswald, Greifswald, Mecklenburg-Vorpommern, DE
58. Roche Pharmaceutical Research and Early Development, Pharmaceutical Sciences, Roche Innovation Center Basel, F. Hoffmann-La Roche Ltd, Basel, CH
59. Max Planck Institute of Psychiatry, Munich, DE
60. MRC Centre for Neuropsychiatric Genetics and Genomics, Cardiff University, Cardiff, GB
61. Department of Psychological Medicine, University of Worcester, Worcester, GB
62. Division of Research, Kaiser Permanente Northern California, Oakland, CA, US
63. Psychiatry & The Behavioral Sciences, University of Southern California, Los Angeles, CA, US
64. Department of Biomedical Informatics, Harvard Medical School, Boston, MA, US
65. Department of Medicine, Brigham and Women's Hospital, Boston, MA, US
66. Informatics Program, Boston Children's Hospital, Boston, MA, US
67. Wellcome Trust Centre for Human Genetics, University of Oxford, Oxford, GB
68. Institute of Social and Preventive Medicine (IUMSP), Lausanne University Hospital and University of Lausanne, Lausanne, VD, CH
69. Swiss Institute of Bioinformatics, Lausanne, VD, CH
70. Division of Psychiatry, Centre for Clinical Brain Sciences, University of Edinburgh, Edinburgh, GB
71. Mental Health, NHS 24, Glasgow, GB
72. Department of Psychiatry and Psychotherapy, University of Bonn, Bonn, DE

73. Statistics, University of Oxford, Oxford, GB
74. Psychiatry, Columbia University College of Physicians and Surgeons, New York, NY, US
75. School of Psychology and Counseling, Queensland University of Technology, Brisbane, QLD, AU
76. Child and Youth Mental Health Service, Children's Health Queensland Hospital and Health Service, South Brisbane, QLD, AU
77. Child Health Research Centre, University of Queensland, Brisbane, QLD, AU
78. Estonian Genome Center, University of Tartu, Tartu, EE
79. Medical Genetics, University of British Columbia, Vancouver, BC, CA
80. Statistics, University of British Columbia, Vancouver, BC, CA
81. DZHK (German Centre for Cardiovascular Research), Partner Site Greifswald, University Medicine, University Medicine Greifswald, Greifswald, Mecklenburg-Vorpommern, DE
82. Institute of Clinical Chemistry and Laboratory Medicine, University Medicine Greifswald, Greifswald, Mecklenburg-Vorpommern, DE
83. Institute of Health and Biomedical Innovation, Queensland University of Technology, Brisbane, QLD, AU
84. Humus, Reykjavik, IS
85. Virginia Institute for Psychiatric & Behavioral Genetics, Virginia Commonwealth University, Richmond, VA, US
86. Clinical Genetics, Vrije Universiteit Medical Center, Amsterdam, NL
87. Complex Trait Genetics, Vrije Universiteit Amsterdam, Amsterdam, NL
88. Solid Biosciences, Boston, MA, US
89. Department of Psychiatry, Washington University in Saint Louis School of Medicine, Saint Louis, MO, US
90. Department of Biochemistry and Molecular Biology II, Institute of Neurosciences, Biomedical Research Center (CIBM), University of Granada, Granada, ES
91. Department of Psychiatry, University of Groningen, University Medical Center Groningen, Groningen, NL
92. Department of Psychiatry and Psychotherapy, University Hospital, Ludwig Maximilian University Munich, Munich, DE
93. Institute of Psychiatric Phenomics and Genomics (IPPG), University Hospital, Ludwig Maximilian University Munich, Munich, DE
94. Division of Cancer Epidemiology and Genetics, National Cancer Institute, Bethesda, MD, US
95. Behavioral Health Services, Kaiser Permanente Washington, Seattle, WA, US
96. Faculty of Medicine, Department of Psychiatry, University of Iceland, Reykjavik, IS
97. School of Medicine and Dentistry, James Cook University, Townsville, QLD, AU
98. Institute of Health and Wellbeing, University of Glasgow, Glasgow, GB
99. deCODE Genetics / Amgen, Reykjavik, IS
100. College of Biomedical and Life Sciences, Cardiff University, Cardiff, GB
101. Institute of Epidemiology and Social Medicine, University of Münster, Münster, Nordrhein-Westfalen, DE
102. Institute for Community Medicine, University Medicine Greifswald, Greifswald, Mecklenburg-Vorpommern, DE
103. Department of Psychiatry, University of California, San Diego, San Diego, CA, US
104. KG Jebsen Centre for Psychosis Research, Norway Division of Mental Health and Addiction, Oslo University Hospital, Oslo, NO
105. Medical Genetics Section, CGEM, IGMM, University of Edinburgh, Edinburgh, GB
106. Clinical Neurosciences, University of Cambridge, Cambridge, GB
107. Internal Medicine, Erasmus MC, Rotterdam, Zuid-Holland, NL

108. Roche Pharmaceutical Research and Early Development, Neuroscience, Ophthalmology and Rare Diseases Discovery & Translational Medicine Area, Roche Innovation Center Basel, F. Hoffmann-La Roche Ltd, Basel, CH
109. Department of Psychiatry and Psychotherapy, University Medicine Greifswald, Greifswald, Mecklenburg-Vorpommern, DE
110. Department of Psychiatry, Leiden University Medical Center, Leiden, NL
111. Virginia Institute for Psychiatric & Behavioral Genetics, Virginia Commonwealth University, Richmond, VA, US
112. Computational Sciences Center of Emphasis, Pfizer Global Research and Development, Cambridge, MA, US
113. Institute for Molecular Bioscience; Queensland Brain Institute, The University of Queensland, Brisbane, QLD, AU
114. Department of Psychiatry, University of Münster, Münster, Nordrhein-Westfalen, DE
115. Department of Psychiatry, University of Münster, Münster, DE
116. Department of Psychiatry, Melbourne Medical School, University of Melbourne, Melbourne, AU
117. Florey Institute for Neuroscience and Mental Health, University of Melbourne, Melbourne, AU
118. Institute of Medical Genetics and Pathology, University Hospital Basel, University of Basel, Basel, CH
119. Institute of Neuroscience and Medicine (INM-1), Research Center Juelich, Juelich, DE
120. Amsterdam Public Health Institute, Vrije Universiteit Medical Center, Amsterdam, NL
121. Centre for Integrative Biology, Università degli Studi di Trento, Trento, Trentino-Alto Adige, IT
122. Department of Psychiatry and Psychotherapy, Medical Center - University of Freiburg, Faculty of Medicine, University of Freiburg, Freiburg, DE
123. Center for NeuroModulation, Faculty of Medicine, University of Freiburg, Freiburg, DE
124. Psychiatry, Kaiser Permanente Northern California, San Francisco, CA, US
125. Medical Research Council Human Genetics Unit, Institute of Genetics and Molecular Medicine, University of Edinburgh, Edinburgh, GB
126. Department of Psychiatry, University of Toronto, Toronto, ON, CA
127. Centre for Addiction and Mental Health, Toronto, ON, CA
128. Division of Psychiatry, University College London, London, GB
129. Neuroscience Therapeutic Area, Janssen Research and Development, LLC, Titusville, NJ, US
130. Institute of Molecular and Cell Biology, University of Tartu, Tartu, EE
131. Psychosis Research Unit, Aarhus University Hospital, Risskov, Aarhus, DK
132. Munich Cluster for Systems Neurology (SyNergy), Munich, DE
133. University of Liverpool, Liverpool, GB
134. Mental Health Center Copenhagen, Copenhagen University Hospital, Copenhagen, DK
135. Human Genetics and Computational Biomedicine, Pfizer Global Research and Development, Groton, CT, US
136. Psychiatry, Harvard Medical School, Boston, MA, US
137. Psychiatry, University of Iowa, Iowa City, IA, US
138. Department of Psychiatry and Behavioral Sciences, Johns Hopkins University, Baltimore, MD, US
139. Department of Psychiatry and Psychotherapy, University Medical Center Göttingen, Goettingen, Niedersachsen, DE
140. Human Genetics Branch, NIMH Division of Intramural Research Programs, Bethesda, MD, US

141. Faculty of Medicine, University of Iceland, Reykjavik, IS
142. Child and Adolescent Psychiatry, Erasmus MC, Rotterdam, Zuid-Holland, NL
143. Psychiatry, Erasmus MC, Rotterdam, Zuid-Holland, NL
144. Psychiatry, Dalhousie University, Halifax, NS, CA
145. Division of Epidemiology, New York State Psychiatric Institute, New York, NY, US
146. Department of Clinical Medicine, University of Copenhagen, Copenhagen, DK
147. Department of Medical & Molecular Genetics, King's College London, London, GB
148. Psychiatry & Behavioral Sciences, Stanford University, Stanford, CA, US
149. NIHR Maudsley Biomedical Research Centre, King's College London, London, GB
150. Genetics, University of North Carolina at Chapel Hill, Chapel Hill, NC, US
151. Psychiatry, University of North Carolina at Chapel Hill, Chapel Hill, NC, US
