# Supplementary material for: Bipolar multiplex families have an increased burden of common risk variants for psychiatric disorders
Source: Mol Psychiatry. 2019 Nov 11;26(4):1286–98. doi: 10.1038/s41380-019-0558-2 (PMC7985020; doi:10.1038/s41380-019-0558-2)
Supplement: Supplementary file 2 — Supplemental Tables [file 41380_2019_558_MOESM2_ESM.xlsx]

## Sheet: Table S1. Demographics
Supplementary Table S1: Test statistics of the demographic comparisons between the different samples (see Table 1).
Comparisons	Statistic	p	Adjusted p (Bonferroni-Holm)
Age at interview	H=10.266	0.0362
FamBD vs. FamMDD	Z=-1.388	0.165
FamBD vs. Famunaffected	Z=-1.826	0.0678
FamBD vs. CCBD	Z=-1.410	0.159
FamBD vs. CCcontrols	Z=-0.152	0.88
FamMDD vs. Famunaffected	Z=-0.156	0.876
FamMDD vs. CCBD	Z=-0.173	0.863
FamMDD vs. CCcontrols	Z=-1.662	0.0965
Famunaffected vs. CCBD	Z=-0.656	0.512
Famunaffected vs. CCcontrols	Z=-2.669	0.0232	0.2088
CCBD vs. CCcontrols	Z=-2.764	0.00571	0.0571
Age of onset	H=21.801	1.8e-05
FamBD vs. FamMDD	Z=-4.181	2.9e-05	8.7e-05
FamBD vs. CCBD	Z=-3.462	0.000535	0.00107
FamMDD vs. CCBD	Z=-1.666	0.0957
Gender	χ²=35.861	3.09e-07
FamBD vs. FamMDD	χ²=1.193	0.275
FamBD vs. Famunaffected	χ²=22.363	2e-06	1.8e-05
FamBD vs. CCBD	χ²=1.034	0.309
FamBD vs. CCcontrols	χ²=8.635	0.00469	0.02814
FamMDD vs. Famunaffected	χ²=22.613	1e-06	9e-06
FamMDD vs. CCBD	χ²=3.557	0.059
FamMDD vs. CCcontrols	χ²=11.361	0.00075	0.00525
Famunaffected vs. CCBD	χ²=13.981	0.000185	0.00148
Famunaffected vs. CCcontrols	χ²=6.037	0.014	0.07
CCBD vs. CCcontrols	χ²=3.204	0.0734
Educational Level	χ²=34.829	4.8752e-07
Primary School
FamBD vs. FamMDD	χ²=0.249	0.618
FamBD vs. Famunaffected	χ²=0.020	0.886
FamBD vs. CCBD	χ²=9.460	0.0021	0.0126
FamMDD vs. Famunaffected	χ²=0.137	0.711
FamMDD vs. CCBD	χ²=3.867	0.0501
Famunaffected vs. CCBD	χ²=7.975	0.00474	0.0237
Secondary School
FamBD vs. FamMDD	χ²=0.005	0.943
FamBD vs. Famunaffected	χ²=0.020	0.784
FamBD vs. CCBD	χ²=6.651	0.013	0.078
FamMDD vs. Famunaffected	χ²=0.085	0.771
FamMDD vs. CCBD	χ²=4.062	0.044	0.176
Famunaffected vs. CCBD	χ²=4.449	0.034	0.17
University degree
FamBD vs. FamMDD	χ²=1.588	0.208
FamBD vs. Famunaffected	χ²=0.000	0.997
FamBD vs. CCBD	χ²=2.528	0.112
FamMDD vs. Famunaffected	χ²=1.482	0.223
FamMDD vs. CCBD	χ²=0.007	0.993
Famunaffected vs. CCBD	χ²=2.304	0.129
Severe impairment during the disorder	χ²=203.780	5.6187e-47
FamBD vs. FamMDD	χ²=71.931	2.2286e-17	4.4572e-17
FamBD vs. CCBD	χ²=66.484	1.6167e-15	1.6167e-15
FamMDD vs. CCBD	χ²=210.108	1.3009e-47	3.9027e-47
Hystory of psychosis	χ²=209.830	2.7287e-46
FamBD vs. FamMDD	χ²=79.680	4.409e-17	8.818e-17
FamBD vs. CCBD	χ²=59.139	1.4693e-14	1.4693e-14
FamMDD vs. CCBD	χ²=212.139	4.1255e-48	1.23765e-47
History of suicide attempts	χ²=209.830	2.7287e-46
FamBD vs. FamMDD	χ²=17.209	2.3e-05	6.9e-05
FamBD vs. Famunaffected	χ²=37.934	7.318e-10	3.659e-09
FamBD vs. CCBD	χ²=0.001	0.976
FamMDD vs. Famunaffected	χ²=1.327	0.239
FamMDD vs. CCBD	χ²=18.018	2.2e-05	8.8e-05
Famunaffected vs. CCBD	χ²=38.102	6.7151e-10	4.02906e-09

## Sheet: Table S2. Number of SNPs
Supplementary Table S2: The number of variants used for calculation of each PRS (after clumping).
Dataset	Threshold	BD	SCZ	MDD	Shared	BD-MDD	BD-SCZ	MDD-BD	MDD-SCZ	SCZ-BD	SCZ-MDD	LOAD
FAM+CC	5e-08	17	116	47	40	17	1	24	30	4	82	32
FAM+CC	1e-07	24	138	56	48	21	1	28	36	4	98	36
FAM+CC	1e-06	66	268	118	83	60	9	65	81	11	171	42
FAM+CC	1e-05	155	561	273	146	142	33	137	196	26	357	69
FAM+CC	0.0001	527	1367	775	287	445	117	412	524	96	925	230
FAM+CC	0.001	2110	3732	2746	478	1459	563	1515	1750	466	2484	1142
FAM+CC	0.01	9460	12642	10884	977	5816	3226	5982	6571	2862	7817	6622
FAM+CC	0.05	27451	30767	29396	1181	15272	10938	15871	16868	10397	18176	21756
FAM+CC	0.1	43244	45119	44580	1183	23272	18474	23955	25028	17757	26423	34940
FAM+CC	0.2	66021	65457	66953	1183	35164	30635	35462	36699	30001	38097	54719
FAM	5e-08	17	130	50	40	17	1	25	31	5	89	38
FAM	1e-07	24	155	60	48	21	1	29	37	5	107	41
FAM	1e-06	71	291	126	91	63	10	67	83	12	188	49
FAM	1e-05	183	666	315	167	160	37	142	206	29	400	92
FAM	0.0001	652	1645	935	333	490	136	447	566	105	1015	281
FAM	0.001	2758	4951	3542	561	1677	630	1714	1976	527	2797	1457
FAM	0.01	13096	17918	14711	1180	6798	3729	6972	7610	3318	9090	8684
FAM	0.05	38444	42692	40580	1442	17914	12899	18567	19884	12183	21554	28689
FAM	0.1	59720	61823	61307	1444	27536	21779	28069	29599	20926	31350	45910
FAM	0.2	89684	87936	90434	1444	41321	35934	41521	43450	35282	45323	70855

## Sheet: Table S3. FAM BD - CC ctrl
Supplementary Table S3: Full association test results for the comparison of PRS between FAMBD cases and CCcontrols. Covariate used: Sex. Married-in family members were excluded.
PRS	Threshold	OR	95 % CI	p-value	p-value 1-sided
Bipolar Disorder	5e-08	1.359	1.043-1.772	0.0233	0.0117
Bipolar Disorder	1e-07	1.558	1.184-2.052	0.00157	0.000786
Bipolar Disorder	1e-06	1.52	1.160-1.990	0.00237	0.00119
Bipolar Disorder	1e-05	1.64	1.249-2.152	0.000365	0.000182
Bipolar Disorder	0.0001	1.549	1.176-2.042	0.00188	0.000939
Bipolar Disorder	0.001	1.656	1.247-2.198	0.000491	0.000246
Bipolar Disorder	0.01	2.179	1.601-2.966	7.35e-07	3.68e-07
Bipolar Disorder	0.05	2.935	2.115-4.072	1.17e-10	5.85e-11
Bipolar Disorder	0.1	2.969	2.151-4.100	3.81e-11	1.9e-11
Bipolar Disorder	0.2	2.874	2.093-3.947	6.71e-11	3.35e-11
Schizophrenia	5e-08	1.288	0.988-1.679	0.0619	0.0309
Schizophrenia	1e-07	1.247	0.959-1.621	0.0995	0.0497
Schizophrenia	1e-06	1.263	0.965-1.652	0.0891	0.0446
Schizophrenia	1e-05	1.46	1.102-1.933	0.00829	0.00414
Schizophrenia	0.0001	1.524	1.163-1.996	0.00222	0.00111
Schizophrenia	0.001	1.555	1.185-2.040	0.00146	0.000732
Schizophrenia	0.01	1.655	1.252-2.188	0.000408	0.000204
Schizophrenia	0.05	1.797	1.345-2.402	7.45e-05	3.72e-05
Schizophrenia	0.1	1.918	1.426-2.581	1.71e-05	8.53e-06
Schizophrenia	0.2	1.889	1.412-2.527	1.87e-05	9.33e-06
MDD	5e-08	1.12	0.858-1.461	0.406	0.203
MDD	1e-07	1.096	0.838-1.432	0.504	0.252
MDD	1e-06	1.095	0.835-1.436	0.513	0.256
MDD	1e-05	1.019	0.784-1.324	0.888	0.444
MDD	0.0001	0.988	0.764-1.278	0.929	0.535
MDD	0.001	0.892	0.685-1.161	0.396	0.802
MDD	0.01	1.092	0.836-1.428	0.518	0.259
MDD	0.05	1.236	0.940-1.623	0.129	0.0644
MDD	0.1	1.373	1.044-1.805	0.0235	0.0117
MDD	0.2	1.393	1.058-1.833	0.018	0.00902
Shared	5e-08	1.216	0.930-1.589	0.152	0.076
Shared	1e-07	1.221	0.939-1.586	0.136	0.0681
Shared	1e-06	1.177	0.911-1.520	0.213	0.107
Shared	1e-05	1.265	0.978-1.638	0.0737	0.0369
Shared	0.0001	1.167	0.905-1.505	0.235	0.117
Shared	0.001	1.259	0.971-1.632	0.082	0.041
Shared	0.01	1.592	1.209-2.097	0.000923	0.000462
Shared	0.05	1.615	1.220-2.139	0.000819	0.000409
Shared	0.1	1.638	1.235-2.171	0.000608	0.000304
GWIS BD-SCZ	5e-08	1.027	0.789-1.337	0.843	0.422
GWIS BD-SCZ	1e-07	1.027	0.789-1.337	0.843	0.422
GWIS BD-SCZ	1e-06	1.067	0.816-1.395	0.636	0.318
GWIS BD-SCZ	1e-05	1.214	0.933-1.581	0.149	0.0746
GWIS BD-SCZ	0.0001	1.373	1.049-1.798	0.0211	0.0106
GWIS BD-SCZ	0.001	1.246	0.952-1.631	0.109	0.0547
GWIS BD-SCZ	0.01	1.138	0.875-1.480	0.336	0.168
GWIS BD-SCZ	0.05	1.231	0.942-1.608	0.128	0.0639
GWIS BD-SCZ	0.1	1.229	0.940-1.606	0.131	0.0657
GWIS BD-SCZ	0.2	1.223	0.933-1.604	0.145	0.0723
GWIS BD-MDD	5e-08	1.3	0.999-1.690	0.0505	0.0252
GWIS BD-MDD	1e-07	1.273	0.980-1.653	0.0706	0.0353
GWIS BD-MDD	1e-06	1.405	1.074-1.838	0.0132	0.0066
GWIS BD-MDD	1e-05	1.589	1.205-2.095	0.00102	0.000509
GWIS BD-MDD	0.0001	1.324	1.010-1.736	0.0419	0.0209
GWIS BD-MDD	0.001	1.583	1.197-2.092	0.00126	0.000631
GWIS BD-MDD	0.01	1.452	1.101-1.915	0.00834	0.00417
GWIS BD-MDD	0.05	1.355	1.026-1.789	0.0322	0.0161
GWIS BD-MDD	0.1	1.532	1.153-2.037	0.0033	0.00165
GWIS BD-MDD	0.2	1.524	1.153-2.014	0.00309	0.00155
GWIS SCZ-BD	5e-08	1.473	1.076-2.016	0.0157	0.00783
GWIS SCZ-BD	1e-07	1.473	1.076-2.016	0.0157	0.00783
GWIS SCZ-BD	1e-06	1.114	0.848-1.463	0.439	0.219
GWIS SCZ-BD	1e-05	0.982	0.753-1.280	0.894	0.553
GWIS SCZ-BD	0.0001	0.969	0.739-1.270	0.818	0.591
GWIS SCZ-BD	0.001	0.952	0.716-1.265	0.735	0.633
GWIS SCZ-BD	0.01	1.112	0.854-1.448	0.432	0.216
GWIS SCZ-BD	0.05	1.032	0.787-1.355	0.819	0.41
GWIS SCZ-BD	0.1	1.104	0.843-1.445	0.473	0.236
GWIS SCZ-BD	0.2	1.081	0.830-1.409	0.564	0.282
GWIS MDD-BD	5e-08	0.99	0.763-1.284	0.939	0.531
GWIS MDD-BD	1e-07	0.968	0.744-1.259	0.808	0.596
GWIS MDD-BD	1e-06	1.046	0.800-1.367	0.744	0.372
GWIS MDD-BD	1e-05	0.972	0.742-1.273	0.835	0.583
GWIS MDD-BD	0.0001	0.947	0.730-1.229	0.683	0.659
GWIS MDD-BD	0.001	0.789	0.596-1.044	0.0975	0.951
GWIS MDD-BD	0.01	0.865	0.661-1.133	0.293	0.853
GWIS MDD-BD	0.05	0.858	0.655-1.126	0.27	0.865
GWIS MDD-BD	0.1	0.914	0.700-1.192	0.506	0.747
GWIS MDD-BD	0.2	1.017	0.778-1.330	0.901	0.451
LOAD Alzheimer	5e-08	0.998	0.772-1.290	0.988	0.506
LOAD Alzheimer	1e-07	1.039	0.803-1.344	0.771	0.385
LOAD Alzheimer	1e-06	1.092	0.847-1.406	0.497	0.249
LOAD Alzheimer	1e-05	1.125	0.871-1.452	0.367	0.183
LOAD Alzheimer	0.0001	1.081	0.834-1.401	0.555	0.278
LOAD Alzheimer	0.001	1.055	0.810-1.374	0.693	0.346
LOAD Alzheimer	0.01	0.952	0.737-1.230	0.707	0.646
LOAD Alzheimer	0.05	1.078	0.842-1.381	0.553	0.276
LOAD Alzheimer	0.1	1.073	0.840-1.369	0.574	0.287
LOAD Alzheimer	0.2	1.178	0.921-1.507	0.191	0.0956

## Sheet: Table S4. FAM BD - CC BD
Supplementary Table S4: Full association test results for the comparison of PRS between FAMBD cases and unrelated CCBD cases. Covariate used: Sex. Married-in family members were excluded
PRS	Threshold	OR	95 % CI	p-value	p-value 1-sided
Bipolar Disorder	5e-08	1.109	0.819-1.501	0.504	0.252
Bipolar Disorder	1e-07	1.178	0.872-1.592	0.286	0.143
Bipolar Disorder	1e-06	1.061	0.789-1.428	0.693	0.347
Bipolar Disorder	1e-05	1.128	0.832-1.528	0.437	0.219
Bipolar Disorder	0.0001	1.107	0.818-1.498	0.508	0.254
Bipolar Disorder	0.001	1.206	0.898-1.618	0.214	0.107
Bipolar Disorder	0.01	1.278	0.945-1.729	0.111	0.0555
Bipolar Disorder	0.05	1.628	1.203-2.202	0.00158	0.00079
Bipolar Disorder	0.1	1.731	1.280-2.341	0.00037	0.000185
Bipolar Disorder	0.2	1.979	1.454-2.694	1.45e-05	7.23e-06
Schizophrenia	5e-08	0.913	0.684-1.220	0.539	0.73
Schizophrenia	1e-07	0.831	0.624-1.106	0.204	0.898
Schizophrenia	1e-06	0.81	0.603-1.090	0.164	0.918
Schizophrenia	1e-05	0.877	0.656-1.173	0.376	0.812
Schizophrenia	0.0001	1.046	0.770-1.421	0.775	0.387
Schizophrenia	0.001	1.035	0.768-1.396	0.821	0.411
Schizophrenia	0.01	1.001	0.740-1.356	0.993	0.496
Schizophrenia	0.05	1.026	0.762-1.382	0.865	0.432
Schizophrenia	0.1	1.07	0.795-1.441	0.655	0.328
Schizophrenia	0.2	1.092	0.813-1.467	0.56	0.28
MDD	5e-08	1.078	0.805-1.442	0.615	0.308
MDD	1e-07	1.116	0.833-1.496	0.461	0.231
MDD	1e-06	1.077	0.805-1.440	0.619	0.31
MDD	1e-05	1.001	0.743-1.348	0.995	0.498
MDD	0.0001	0.978	0.733-1.303	0.877	0.561
MDD	0.001	0.869	0.654-1.156	0.336	0.832
MDD	0.01	0.913	0.691-1.205	0.52	0.74
MDD	0.05	1.077	0.814-1.423	0.604	0.302
MDD	0.1	1.238	0.931-1.645	0.142	0.0709
MDD	0.2	1.216	0.910-1.626	0.186	0.0931
Shared	5e-08	1.041	0.778-1.392	0.788	0.394
Shared	1e-07	1.119	0.838-1.494	0.444	0.222
Shared	1e-06	1.09	0.818-1.452	0.557	0.279
Shared	1e-05	1.118	0.838-1.491	0.448	0.224
Shared	0.0001	1.032	0.777-1.373	0.826	0.413
Shared	0.001	1.024	0.777-1.349	0.869	0.434
Shared	0.01	1.091	0.819-1.453	0.551	0.275
Shared	0.05	0.985	0.727-1.335	0.922	0.539
Shared	0.1	0.989	0.729-1.340	0.941	0.53
GWIS BD-SCZ	5e-08	1.127	0.844-1.505	0.418	0.209
GWIS BD-SCZ	1e-07	1.127	0.844-1.505	0.418	0.209
GWIS BD-SCZ	1e-06	0.91	0.687-1.205	0.509	0.746
GWIS BD-SCZ	1e-05	1.093	0.812-1.472	0.558	0.279
GWIS BD-SCZ	0.0001	1.116	0.818-1.522	0.489	0.244
GWIS BD-SCZ	0.001	0.962	0.721-1.285	0.795	0.602
GWIS BD-SCZ	0.01	0.93	0.694-1.247	0.629	0.686
GWIS BD-SCZ	0.05	1.029	0.767-1.380	0.85	0.425
GWIS BD-SCZ	0.1	0.946	0.699-1.280	0.719	0.641
GWIS BD-SCZ	0.2	0.992	0.723-1.363	0.962	0.519
GWIS BD-MDD	5e-08	0.996	0.742-1.336	0.977	0.512
GWIS BD-MDD	1e-07	1.019	0.766-1.355	0.897	0.448
GWIS BD-MDD	1e-06	1.053	0.786-1.409	0.731	0.365
GWIS BD-MDD	1e-05	1.269	0.942-1.711	0.117	0.0587
GWIS BD-MDD	0.0001	0.951	0.705-1.282	0.739	0.63
GWIS BD-MDD	0.001	0.968	0.725-1.292	0.826	0.587
GWIS BD-MDD	0.01	0.977	0.739-1.292	0.871	0.565
GWIS BD-MDD	0.05	0.832	0.621-1.113	0.215	0.893
GWIS BD-MDD	0.1	0.882	0.661-1.177	0.393	0.804
GWIS BD-MDD	0.2	0.904	0.672-1.214	0.501	0.749
GWIS SCZ-BD	5e-08	1.28	0.901-1.819	0.168	0.084
GWIS SCZ-BD	1e-07	1.28	0.901-1.819	0.168	0.084
GWIS SCZ-BD	1e-06	0.995	0.741-1.337	0.975	0.512
GWIS SCZ-BD	1e-05	0.957	0.713-1.284	0.77	0.615
GWIS SCZ-BD	0.0001	0.826	0.623-1.096	0.185	0.908
GWIS SCZ-BD	0.001	0.886	0.658-1.193	0.425	0.787
GWIS SCZ-BD	0.01	1.042	0.769-1.414	0.789	0.394
GWIS SCZ-BD	0.05	0.932	0.686-1.267	0.654	0.673
GWIS SCZ-BD	0.1	0.961	0.694-1.330	0.811	0.594
GWIS SCZ-BD	0.2	0.998	0.723-1.378	0.992	0.504
GWIS MDD-BD	5e-08	1.008	0.733-1.387	0.96	0.48
GWIS MDD-BD	1e-07	1.024	0.749-1.400	0.883	0.442
GWIS MDD-BD	1e-06	1.199	0.895-1.605	0.223	0.112
GWIS MDD-BD	1e-05	1.143	0.857-1.525	0.364	0.182
GWIS MDD-BD	0.0001	1.092	0.825-1.447	0.538	0.269
GWIS MDD-BD	0.001	0.878	0.668-1.154	0.349	0.825
GWIS MDD-BD	0.01	1.034	0.780-1.371	0.815	0.408
GWIS MDD-BD	0.05	0.937	0.709-1.238	0.647	0.676
GWIS MDD-BD	0.1	1.028	0.780-1.353	0.847	0.423
GWIS MDD-BD	0.2	1.105	0.840-1.454	0.477	0.238
LOAD Alzheimer	5e-08	1.004	0.752-1.338	0.981	0.49
LOAD Alzheimer	1e-07	1.031	0.771-1.378	0.838	0.419
LOAD Alzheimer	1e-06	1.072	0.802-1.433	0.639	0.32
LOAD Alzheimer	1e-05	1.085	0.812-1.451	0.582	0.291
LOAD Alzheimer	0.0001	1.134	0.842-1.529	0.408	0.204
LOAD Alzheimer	0.001	1.127	0.835-1.522	0.433	0.217
LOAD Alzheimer	0.01	1.034	0.774-1.383	0.819	0.41
LOAD Alzheimer	0.05	1.148	0.848-1.555	0.371	0.185
LOAD Alzheimer	0.1	1.128	0.840-1.515	0.424	0.212
LOAD Alzheimer	0.2	1.185	0.879-1.597	0.265	0.133

## Sheet: Table S5. FAM unaff - CC ctrl
Supplementary Table S5: Full association test results for the comparison of PRS between FAMunaffected and CCcontrols. Covariates used: Sex. Married-in family members were excluded.
PRS	Threshold	OR	95 % CI	p-value	p-value 1-sided
Bipolar Disorder	5e-08	1.232	0.915-1.658	0.169	0.0846
Bipolar Disorder	1e-07	1.307	0.967-1.767	0.082	0.041
Bipolar Disorder	1e-06	1.35	0.994-1.833	0.0549	0.0274
Bipolar Disorder	1e-05	1.214	0.901-1.637	0.202	0.101
Bipolar Disorder	0.0001	0.931	0.689-1.257	0.641	0.68
Bipolar Disorder	0.001	1.085	0.809-1.455	0.586	0.293
Bipolar Disorder	0.01	1.604	1.177-2.187	0.00279	0.00139
Bipolar Disorder	0.05	2.649	1.818-3.861	3.96e-07	1.98e-07
Bipolar Disorder	0.1	2.758	1.907-3.990	7.24e-08	3.62e-08
Bipolar Disorder	0.2	2.806	1.959-4.021	1.85e-08	9.26e-09
Schizophrenia	5e-08	1.277	0.940-1.735	0.117	0.0586
Schizophrenia	1e-07	1.311	0.965-1.783	0.0837	0.0418
Schizophrenia	1e-06	1.208	0.902-1.618	0.205	0.103
Schizophrenia	1e-05	1.432	1.045-1.962	0.0254	0.0127
Schizophrenia	0.0001	1.422	1.060-1.907	0.0188	0.00938
Schizophrenia	0.001	1.552	1.156-2.084	0.00348	0.00174
Schizophrenia	0.01	1.571	1.176-2.098	0.00223	0.00111
Schizophrenia	0.05	1.701	1.265-2.287	0.000442	0.000221
Schizophrenia	0.1	2.095	1.526-2.876	4.79e-06	2.39e-06
Schizophrenia	0.2	2.036	1.487-2.788	9.19e-06	4.59e-06
MDD	5e-08	1.075	0.806-1.435	0.623	0.311
MDD	1e-07	1.061	0.792-1.423	0.691	0.345
MDD	1e-06	1.133	0.847-1.515	0.4	0.2
MDD	1e-05	1.023	0.767-1.365	0.877	0.439
MDD	0.0001	1.059	0.796-1.410	0.694	0.347
MDD	0.001	1.087	0.819-1.443	0.565	0.282
MDD	0.01	1.122	0.828-1.519	0.458	0.229
MDD	0.05	1.29	0.939-1.773	0.116	0.0581
MDD	0.1	1.44	1.056-1.965	0.0213	0.0106
MDD	0.2	1.532	1.121-2.093	0.00738	0.00369
Shared	5e-08	1.196	0.904-1.582	0.209	0.105
Shared	1e-07	1.168	0.884-1.543	0.274	0.137
Shared	1e-06	1.117	0.844-1.480	0.439	0.22
Shared	1e-05	1.299	0.976-1.729	0.0729	0.0364
Shared	0.0001	1.109	0.821-1.497	0.5	0.25
Shared	0.001	1.196	0.885-1.616	0.244	0.122
Shared	0.01	1.413	1.048-1.905	0.0234	0.0117
Shared	0.05	1.439	1.071-1.934	0.0157	0.00783
Shared	0.1	1.44	1.075-1.930	0.0145	0.00727
GWIS BD-SCZ	5e-08	1.014	0.754-1.364	0.926	0.463
GWIS BD-SCZ	1e-07	1.014	0.754-1.364	0.926	0.463
GWIS BD-SCZ	1e-06	1.066	0.796-1.428	0.668	0.334
GWIS BD-SCZ	1e-05	1.049	0.783-1.404	0.749	0.374
GWIS BD-SCZ	0.0001	1.169	0.872-1.568	0.297	0.149
GWIS BD-SCZ	0.001	0.966	0.723-1.291	0.815	0.592
GWIS BD-SCZ	0.01	0.906	0.672-1.222	0.517	0.741
GWIS BD-SCZ	0.05	0.887	0.663-1.188	0.421	0.79
GWIS BD-SCZ	0.1	0.861	0.646-1.148	0.308	0.846
GWIS BD-SCZ	0.2	0.885	0.672-1.166	0.386	0.807
GWIS BD-MDD	5e-08	1.346	0.992-1.828	0.0566	0.0283
GWIS BD-MDD	1e-07	1.19	0.876-1.617	0.266	0.133
GWIS BD-MDD	1e-06	1.115	0.819-1.517	0.49	0.245
GWIS BD-MDD	1e-05	1.064	0.790-1.433	0.681	0.34
GWIS BD-MDD	0.0001	0.873	0.653-1.168	0.361	0.82
GWIS BD-MDD	0.001	1.047	0.771-1.423	0.767	0.384
GWIS BD-MDD	0.01	1.112	0.814-1.518	0.504	0.252
GWIS BD-MDD	0.05	0.983	0.723-1.338	0.915	0.542
GWIS BD-MDD	0.1	1.16	0.844-1.594	0.36	0.18
GWIS BD-MDD	0.2	1.213	0.892-1.650	0.218	0.109
GWIS SCZ-BD	5e-08	1.291	0.959-1.738	0.0917	0.0458
GWIS SCZ-BD	1e-07	1.291	0.959-1.738	0.0917	0.0458
GWIS SCZ-BD	1e-06	1.144	0.856-1.528	0.364	0.182
GWIS SCZ-BD	1e-05	0.919	0.693-1.219	0.558	0.721
GWIS SCZ-BD	0.0001	0.861	0.642-1.155	0.319	0.841
GWIS SCZ-BD	0.001	0.868	0.653-1.153	0.328	0.836
GWIS SCZ-BD	0.01	1.415	1.072-1.869	0.0143	0.00713
GWIS SCZ-BD	0.05	1.248	0.944-1.649	0.12	0.0598
GWIS SCZ-BD	0.1	1.364	1.042-1.786	0.024	0.012
GWIS SCZ-BD	0.2	1.381	1.055-1.806	0.0186	0.0093
GWIS MDD-BD	5e-08	1.087	0.829-1.424	0.547	0.274
GWIS MDD-BD	1e-07	1.108	0.844-1.454	0.459	0.23
GWIS MDD-BD	1e-06	1.175	0.883-1.565	0.268	0.134
GWIS MDD-BD	1e-05	1.081	0.801-1.459	0.609	0.305
GWIS MDD-BD	0.0001	0.928	0.687-1.253	0.627	0.687
GWIS MDD-BD	0.001	0.888	0.660-1.194	0.431	0.784
GWIS MDD-BD	0.01	0.882	0.652-1.192	0.414	0.793
GWIS MDD-BD	0.05	0.875	0.648-1.183	0.387	0.807
GWIS MDD-BD	0.1	0.879	0.647-1.195	0.412	0.794
GWIS MDD-BD	0.2	1.017	0.747-1.384	0.916	0.458
LOAD Alzheimer	5e-08	1.037	0.781-1.375	0.804	0.402
LOAD Alzheimer	1e-07	1.057	0.799-1.398	0.699	0.349
LOAD Alzheimer	1e-06	1.09	0.825-1.439	0.544	0.272
LOAD Alzheimer	1e-05	1.128	0.855-1.490	0.395	0.197
LOAD Alzheimer	0.0001	1.06	0.806-1.394	0.678	0.339
LOAD Alzheimer	0.001	1.062	0.806-1.398	0.67	0.335
LOAD Alzheimer	0.01	0.924	0.702-1.216	0.572	0.714
LOAD Alzheimer	0.05	1.109	0.845-1.456	0.457	0.228
LOAD Alzheimer	0.1	1.046	0.796-1.376	0.745	0.373
LOAD Alzheimer	0.2	1.244	0.941-1.644	0.125	0.0623

## Sheet: Table S6. FAM BD - FAM unaff
Supplementary Table S6: Full association test results for the comparison of PRS between FAMBD cases and FAMunaffected. Fixed effects covariates: Sex, age at interview; random effects covariate: married-in status.
PRS	Threshold	OR	95 % CI	p-value	p-value 1-sided
Bipolar Disorder	5e-08	1.131	0.889-1.440	0.316	0.158
Bipolar Disorder	1e-07	1.257	0.986-1.603	0.0649	0.0325
Bipolar Disorder	1e-06	1.339	1.047-1.711	0.0198	0.00992
Bipolar Disorder	1e-05	1.489	1.163-1.906	0.00161	0.000805
Bipolar Disorder	0.0001	1.616	1.250-2.089	0.000251	0.000125
Bipolar Disorder	0.001	1.269	1.005-1.602	0.0452	0.0226
Bipolar Disorder	0.01	1.299	1.023-1.650	0.0316	0.0158
Bipolar Disorder	0.05	1.132	0.891-1.440	0.31	0.155
Bipolar Disorder	0.1	1.088	0.857-1.381	0.489	0.244
Bipolar Disorder	0.2	1.137	0.897-1.442	0.288	0.144
Schizophrenia	5e-08	1.006	0.795-1.274	0.959	0.48
Schizophrenia	1e-07	0.979	0.775-1.237	0.862	0.569
Schizophrenia	1e-06	1.075	0.853-1.356	0.54	0.27
Schizophrenia	1e-05	1.072	0.848-1.355	0.563	0.281
Schizophrenia	0.0001	1.174	0.930-1.483	0.177	0.0886
Schizophrenia	0.001	1.128	0.894-1.423	0.31	0.155
Schizophrenia	0.01	1.08	0.860-1.356	0.51	0.255
Schizophrenia	0.05	1.043	0.825-1.317	0.726	0.363
Schizophrenia	0.1	1.014	0.802-1.281	0.909	0.455
Schizophrenia	0.2	1.017	0.799-1.293	0.892	0.446
MDD	5e-08	1.052	0.823-1.343	0.687	0.343
MDD	1e-07	1.039	0.811-1.330	0.763	0.381
MDD	1e-06	1.013	0.797-1.289	0.914	0.457
MDD	1e-05	1.006	0.795-1.272	0.963	0.481
MDD	0.0001	1.046	0.826-1.324	0.711	0.356
MDD	0.001	0.905	0.717-1.143	0.402	0.799
MDD	0.01	0.983	0.777-1.243	0.884	0.558
MDD	0.05	1.052	0.831-1.333	0.673	0.336
MDD	0.1	1.135	0.894-1.439	0.298	0.149
MDD	0.2	1.044	0.824-1.323	0.721	0.36
Shared	5e-08	1.054	0.830-1.338	0.667	0.333
Shared	1e-07	1.104	0.871-1.399	0.413	0.207
Shared	1e-06	1.09	0.864-1.374	0.467	0.234
Shared	1e-05	1.091	0.860-1.384	0.471	0.236
Shared	0.0001	1.139	0.897-1.448	0.285	0.142
Shared	0.001	1.174	0.928-1.485	0.181	0.0905
Shared	0.01	1.243	0.977-1.580	0.0764	0.0382
Shared	0.05	1.159	0.915-1.467	0.22	0.11
Shared	0.1	1.165	0.920-1.475	0.204	0.102
GWIS BD-SCZ	5e-08	1.122	0.885-1.422	0.343	0.172
GWIS BD-SCZ	1e-07	1.122	0.885-1.422	0.343	0.172
GWIS BD-SCZ	1e-06	1.029	0.811-1.307	0.813	0.406
GWIS BD-SCZ	1e-05	1.182	0.933-1.496	0.166	0.0831
GWIS BD-SCZ	0.0001	1.27	0.998-1.614	0.0515	0.0258
GWIS BD-SCZ	0.001	1.388	1.091-1.767	0.00772	0.00386
GWIS BD-SCZ	0.01	1.319	1.036-1.678	0.0245	0.0122
GWIS BD-SCZ	0.05	1.318	1.034-1.681	0.0259	0.0129
GWIS BD-SCZ	0.1	1.343	1.055-1.709	0.0166	0.0083
GWIS BD-SCZ	0.2	1.265	0.997-1.606	0.0533	0.0267
GWIS BD-MDD	5e-08	0.941	0.745-1.190	0.613	0.693
GWIS BD-MDD	1e-07	1.038	0.822-1.310	0.754	0.377
GWIS BD-MDD	1e-06	1.222	0.966-1.547	0.0948	0.0474
GWIS BD-MDD	1e-05	1.516	1.184-1.941	0.000974	0.000487
GWIS BD-MDD	0.0001	1.432	1.124-1.824	0.0037	0.00185
GWIS BD-MDD	0.001	1.434	1.111-1.850	0.00559	0.00279
GWIS BD-MDD	0.01	1.295	1.011-1.659	0.0408	0.0204
GWIS BD-MDD	0.05	1.402	1.088-1.808	0.00912	0.00456
GWIS BD-MDD	0.1	1.302	1.016-1.667	0.0367	0.0183
GWIS BD-MDD	0.2	1.263	0.988-1.615	0.0624	0.0312
GWIS SCZ-BD	5e-08	0.941	0.745-1.190	0.613	0.693
GWIS SCZ-BD	1e-07	1.038	0.822-1.310	0.754	0.377
GWIS SCZ-BD	1e-06	1.222	0.966-1.547	0.0948	0.0474
GWIS SCZ-BD	1e-05	1.516	1.184-1.941	0.000974	0.000487
GWIS SCZ-BD	0.0001	1.432	1.124-1.824	0.0037	0.00185
GWIS SCZ-BD	0.001	1.434	1.111-1.850	0.00559	0.00279
GWIS SCZ-BD	0.01	1.295	1.011-1.659	0.0408	0.0204
GWIS SCZ-BD	0.05	1.402	1.088-1.808	0.00912	0.00456
GWIS SCZ-BD	0.1	1.302	1.016-1.667	0.0367	0.0183
GWIS SCZ-BD	0.2	1.263	0.988-1.615	0.0624	0.0312
GWIS MDD-BD	5e-08	0.973	0.771-1.227	0.818	0.591
GWIS MDD-BD	1e-07	0.915	0.726-1.154	0.455	0.772
GWIS MDD-BD	1e-06	0.977	0.772-1.235	0.843	0.579
GWIS MDD-BD	1e-05	1.042	0.821-1.322	0.736	0.368
GWIS MDD-BD	0.0001	1.063	0.838-1.348	0.613	0.307
GWIS MDD-BD	0.001	0.996	0.792-1.254	0.974	0.513
GWIS MDD-BD	0.01	1.099	0.859-1.407	0.452	0.226
GWIS MDD-BD	0.05	1.021	0.800-1.303	0.865	0.432
GWIS MDD-BD	0.1	1.046	0.820-1.335	0.716	0.358
GWIS MDD-BD	0.2	0.998	0.782-1.273	0.988	0.506
LOAD Alzheimer	5e-08	0.962	0.762-1.213	0.741	0.629
LOAD Alzheimer	1e-07	0.966	0.765-1.218	0.768	0.616
LOAD Alzheimer	1e-06	0.967	0.765-1.222	0.778	0.611
LOAD Alzheimer	1e-05	0.974	0.770-1.231	0.824	0.588
LOAD Alzheimer	0.0001	0.936	0.739-1.186	0.583	0.708
LOAD Alzheimer	0.001	0.976	0.774-1.230	0.838	0.581
LOAD Alzheimer	0.01	0.865	0.689-1.086	0.212	0.894
LOAD Alzheimer	0.05	0.838	0.664-1.057	0.137	0.932
LOAD Alzheimer	0.1	0.86	0.683-1.082	0.198	0.901
LOAD Alzheimer	0.2	0.921	0.734-1.155	0.474	0.763

## Sheet: Table S7. Assortative mating
Supplementary Table S7: Full association test results for the analysis of assortative mating. Covariate used: Sex.
Comparison	PRS	Threshold	OR	95 % CI	p-value	p-value 1-sided
Married-in vs. CC control	Bipolar Disorder	5e-08	1.184	0.815-1.72	0.375	0.188
Married-in vs. CC control	Bipolar Disorder	1e-07	1.285	0.882-1.87	0.192	0.0961
Married-in vs. CC control	Bipolar Disorder	1e-06	1.344	0.925-1.95	0.121	0.0603
Married-in vs. CC control	Bipolar Disorder	1e-05	1.435	0.990-2.08	0.0565	0.0282
Married-in vs. CC control	Bipolar Disorder	0.0001	1.088	0.741-1.60	0.666	0.333
Married-in vs. CC control	Bipolar Disorder	0.001	0.96	0.649-1.42	0.837	0.582
Married-in vs. CC control	Bipolar Disorder	0.01	1.308	0.871-1.96	0.196	0.0978
Married-in vs. CC control	Bipolar Disorder	0.05	2.511	1.567-4.02	0.00013	6.49e-05
Married-in vs. CC control	Bipolar Disorder	0.1	2.115	1.337-3.35	0.00137	0.000685
Married-in vs. CC control	Bipolar Disorder	0.2	2.319	1.455-3.70	0.000402	0.000201
Married-in vs. FAM unaff.	Bipolar Disorder	5e-08	0.926	0.593-1.45	0.735	0.632
Married-in vs. FAM unaff.	Bipolar Disorder	1e-07	0.984	0.625-1.55	0.944	0.528
Married-in vs. FAM unaff.	Bipolar Disorder	1e-06	1.016	0.631-1.64	0.947	0.473
Married-in vs. FAM unaff.	Bipolar Disorder	1e-05	1.27	0.782-2.06	0.334	0.167
Married-in vs. FAM unaff.	Bipolar Disorder	0.0001	1.195	0.774-1.84	0.421	0.211
Married-in vs. FAM unaff.	Bipolar Disorder	0.001	0.884	0.596-1.31	0.538	0.731
Married-in vs. FAM unaff.	Bipolar Disorder	0.01	0.777	0.519-1.16	0.222	0.889
Married-in vs. FAM unaff.	Bipolar Disorder	0.05	0.908	0.588-1.40	0.665	0.668
Married-in vs. FAM unaff.	Bipolar Disorder	0.1	0.75	0.488-1.15	0.19	0.905
Married-in vs. FAM unaff.	Bipolar Disorder	0.2	0.734	0.474-1.14	0.168	0.916

## Sheet: Table S8. Anticipation
Supplementary Table S8: Full association test results for the analysis of anticipation. Covariates used: Sex, age at the interview, diagnostic group (BD/MDD/unaffected). Married-in family members were excluded.
Association	PRS	Threshold	p-value	p-value Bootstrapping	p-value 95 % CI lower	p-value 95 % CI upper	p-value 1-sided	p-value 1-sided Bootstrapping	p-value 1-sided 95 % CI lower	p-value 1-sided 95 % CI upper	p-value Permutation (n=10000)	Beta	Beta Bootstrapping	Beta 95 % CI lower	Beta 95 % CI upper	SE	SE Bootstrapping	SE 95 % CI lower	SE 95 % CI upper	R2	R2 Bootstrapping	R2 95 % CI lower	R2 95 % CI upper	R	R Bootstrapping	R 95 % CI lower	R 95 % CI upper
Generation ~ PRS	Bipolar Disorder	5e-08	0.636777	0.475934	0.0891437	0.995054	0.681611	0.672345	0.0790313	0.992974	0.6815	-0.107648	-0.102083	-0.552801	0.326747	0.227763	0.227695	0.201457	0.261851	0.000650829	0.00148443	1.20933e-07	0.00842786	-0.0255113	-0.0241009	-0.132919	0.0759175
Generation ~ PRS	Bipolar Disorder	1e-07	0.146526	0.148672	0.00100726	0.93188	0.926737	0.925493	0.335957	0.999498	0.927	-0.412858	-0.407635	-0.932723	0.117981	0.28371	0.283064	0.25041	0.328659	0.00613597	0.00606538	2.3823e-05	0.0311714	-0.0783324	-0.0776872	-0.176576	0.0227316
Generation ~ PRS	Bipolar Disorder	1e-06	0.696755	0.485974	0.180865	0.998401	0.651622	0.66721	0.060799	0.988491	0.6407	-0.184467	-0.208994	-1.05046	0.728272	0.472953	0.470641	0.422977	0.545291	0.000443315	0.00142064	1.7421e-08	0.00525197	-0.021055	-0.0234005	-0.123336	0.0831436
Generation ~ PRS	Bipolar Disorder	1e-05	0.901442	0.485426	0.743107	0.999791	0.450721	0.447118	0.0178339	0.972895	0.4461	0.102203	0.108286	-1.64055	1.6856	0.824668	0.821398	0.732553	0.945066	4.4777e-05	0.00142215	1.96996e-10	0.000308083	0.00669156	0.00713714	-0.104057	0.11236
Generation ~ PRS	Bipolar Disorder	0.0001	0.150634	0.167215	0.00046922	0.915469	0.924683	0.914857	0.310993	0.999771	0.9282	-2.50298	-2.39118	-6.21086	0.82064	1.73756	1.7273	1.56732	1.98647	0.00601343	0.00554256	3.35206e-05	0.0350321	-0.0775463	-0.0740393	-0.188255	0.0263221
Generation ~ PRS	Bipolar Disorder	0.001	0.139766	0.14491	0.000345611	0.916151	0.930117	0.926962	0.276777	0.999836	0.9362	-5.51456	-5.43018	-13.9147	2.06038	3.72582	3.72846	3.27409	4.26936	0.00634628	0.00618966	3.27439e-05	0.036473	-0.0796636	-0.0784041	-0.19254	0.0316471
Generation ~ PRS	Bipolar Disorder	0.01	0.349366	0.30364	0.00660594	0.980422	0.825317	0.821469	0.106796	0.998286	0.8207	-8.50059	-8.41	-26.836	11.1167	9.07116	9.04051	8.16822	10.3907	0.00255369	0.00310115	1.97259e-06	0.022091	-0.050534	-0.0497244	-0.157375	0.0656662
Generation ~ PRS	Bipolar Disorder	0.05	0.384405	0.306837	0.00968836	0.985533	0.807798	0.818535	0.0982503	0.99737	0.812	-11.372	-11.9429	-36.338	16.4773	13.0575	13.0329	11.539	14.9152	0.00220651	0.00301967	1.06602e-06	0.0195817	-0.0469735	-0.0490025	-0.151354	0.068834
Generation ~ PRS	Bipolar Disorder	0.1	0.511114	0.412603	0.0382988	0.990823	0.744443	0.754629	0.092553	0.99189	0.7496	-10.9884	-11.4206	-40.8532	21.5567	16.705	16.6723	14.8309	19.1866	0.00125989	0.00195687	3.91567e-07	0.0125736	-0.0354949	-0.0368954	-0.129121	0.0717483
Generation ~ PRS	Bipolar Disorder	0.2	0.893541	0.515829	0.702757	0.999559	0.44677	0.458948	0.0188415	0.954354	0.4549	2.90673	2.15477	-37.2788	43.7946	21.7043	21.5723	19.3474	25.1015	5.22881e-05	0.00123703	8.59377e-10	0.000427978	0.00723105	0.00553416	-0.0914711	0.111932
Age at onset ~ generation	none	NA	0.9517	0.432972	0.925295	0.998743	0.52415	0.53708	0.0105757	0.990455	0.5281	0.0738011	0.111283	-2.99494	2.6247	1.21651	1.20685	0.989223	1.53848	2.28589e-05	0.00386843	1.49928e-08	5.42763e-05	0.0047811	0.00739322	-0.178368	0.184475

## Sheet: Table S9. FAM MDD - CC ctrl
Supplementary Table S9: Full association test results for the comparison of PRS between FAMMDD cases and CCcontrols. Covariate used: Sex. Married-in family members were excluded.
PRS	Threshold	OR	95 % CI	p-value	p-value 1-sided
Bipolar Disorder	5e-08	1.14	0.835-1.558	0.41	0.205
Bipolar Disorder	1e-07	1.306	0.950-1.797	0.101	0.0503
Bipolar Disorder	1e-06	1.369	0.996-1.881	0.0529	0.0264
Bipolar Disorder	1e-05	1.348	0.988-1.839	0.0594	0.0297
Bipolar Disorder	0.0001	1.137	0.830-1.557	0.424	0.212
Bipolar Disorder	0.001	1.16	0.819-1.642	0.403	0.202
Bipolar Disorder	0.01	1.522	1.041-2.227	0.0303	0.0152
Bipolar Disorder	0.05	2.718	1.760-4.199	6.57e-06	3.28e-06
Bipolar Disorder	0.1	3.407	2.145-5.411	2.05e-07	1.03e-07
Bipolar Disorder	0.2	2.846	1.838-4.406	2.72e-06	1.36e-06
Schizophrenia	5e-08	1.286	0.926-1.787	0.134	0.0669
Schizophrenia	1e-07	1.23	0.887-1.707	0.215	0.107
Schizophrenia	1e-06	1.169	0.833-1.641	0.366	0.183
Schizophrenia	1e-05	1.248	0.890-1.751	0.2	0.0998
Schizophrenia	0.0001	1.224	0.884-1.696	0.224	0.112
Schizophrenia	0.001	1.258	0.900-1.758	0.179	0.0896
Schizophrenia	0.01	1.141	0.819-1.589	0.436	0.218
Schizophrenia	0.05	1.221	0.858-1.737	0.266	0.133
Schizophrenia	0.1	1.354	0.956-1.918	0.0883	0.0442
Schizophrenia	0.2	1.272	0.899-1.799	0.174	0.0872
MDD	5e-08	1.105	0.808-1.513	0.532	0.266
MDD	1e-07	1.138	0.833-1.553	0.417	0.208
MDD	1e-06	0.98	0.715-1.345	0.902	0.549
MDD	1e-05	0.944	0.693-1.285	0.713	0.644
MDD	0.0001	0.84	0.614-1.149	0.275	0.863
MDD	0.001	0.847	0.610-1.177	0.322	0.839
MDD	0.01	1.381	0.989-1.930	0.0582	0.0291
MDD	0.05	1.66	1.184-2.329	0.0033	0.00165
MDD	0.1	1.794	1.271-2.532	0.000879	0.00044
MDD	0.2	1.86	1.316-2.629	0.000441	0.000221
Shared	5e-08	1.046	0.761-1.437	0.781	0.39
Shared	1e-07	1.041	0.757-1.433	0.804	0.402
Shared	1e-06	1.009	0.733-1.387	0.957	0.479
Shared	1e-05	1.079	0.783-1.486	0.642	0.321
Shared	0.0001	1.026	0.748-1.408	0.872	0.436
Shared	0.001	1.166	0.837-1.623	0.363	0.182
Shared	0.01	1.286	0.923-1.792	0.137	0.0685
Shared	0.05	1.404	1.017-1.939	0.039	0.0195
Shared	0.1	1.445	1.043-2.002	0.0268	0.0134
GWIS MDD-BD	5e-08	0.885	0.643-1.218	0.453	0.773
GWIS MDD-BD	1e-07	0.9	0.653-1.241	0.521	0.739
GWIS MDD-BD	1e-06	1.097	0.791-1.522	0.579	0.289
GWIS MDD-BD	1e-05	0.958	0.693-1.324	0.795	0.602
GWIS MDD-BD	0.0001	0.763	0.552-1.054	0.101	0.95
GWIS MDD-BD	0.001	0.804	0.561-1.152	0.235	0.882
GWIS MDD-BD	0.01	0.972	0.707-1.336	0.86	0.57
GWIS MDD-BD	0.05	0.977	0.708-1.346	0.885	0.558
GWIS MDD-BD	0.1	1.017	0.739-1.400	0.918	0.459
GWIS MDD-BD	0.2	1.15	0.830-1.592	0.402	0.201
GWIS MDD-SCZ	5e-08	1.118	0.812-1.540	0.492	0.246
GWIS MDD-SCZ	1e-07	1.109	0.803-1.531	0.531	0.266
GWIS MDD-SCZ	1e-06	0.975	0.717-1.325	0.871	0.565
GWIS MDD-SCZ	1e-05	0.888	0.654-1.206	0.447	0.777
GWIS MDD-SCZ	0.0001	0.856	0.619-1.185	0.349	0.825
GWIS MDD-SCZ	0.001	0.601	0.424-0.851	0.00408	0.998
GWIS MDD-SCZ	0.01	0.755	0.544-1.047	0.0918	0.954
GWIS MDD-SCZ	0.05	1.024	0.748-1.401	0.884	0.442
GWIS MDD-SCZ	0.1	1.096	0.798-1.505	0.572	0.286
GWIS MDD-SCZ	0.2	1.136	0.825-1.564	0.435	0.218
GWIS BD-MDD	5e-08	0.998	0.714-1.396	0.99	0.505
GWIS BD-MDD	1e-07	0.945	0.676-1.322	0.743	0.629
GWIS BD-MDD	1e-06	1.063	0.756-1.493	0.726	0.363
GWIS BD-MDD	1e-05	1.177	0.846-1.639	0.333	0.167
GWIS BD-MDD	0.0001	0.869	0.625-1.208	0.403	0.798
GWIS BD-MDD	0.001	1.135	0.809-1.593	0.464	0.232
GWIS BD-MDD	0.01	0.978	0.689-1.387	0.899	0.55
GWIS BD-MDD	0.05	0.946	0.671-1.332	0.749	0.625
GWIS BD-MDD	0.1	1.058	0.743-1.505	0.755	0.378
GWIS BD-MDD	0.2	1.091	0.779-1.529	0.613	0.306
GWIS SCZ-MDD	5e-08	1.479	1.071-2.042	0.0174	0.00872
GWIS SCZ-MDD	1e-07	1.31	0.957-1.793	0.0916	0.0458
GWIS SCZ-MDD	1e-06	1.247	0.903-1.722	0.18	0.09
GWIS SCZ-MDD	1e-05	1.311	0.938-1.834	0.113	0.0566
GWIS SCZ-MDD	0.0001	1.365	0.966-1.931	0.078	0.039
GWIS SCZ-MDD	0.001	1.191	0.842-1.685	0.324	0.162
GWIS SCZ-MDD	0.01	1.255	0.898-1.756	0.184	0.092
GWIS SCZ-MDD	0.05	1.254	0.898-1.752	0.185	0.0923
GWIS SCZ-MDD	0.1	1.179	0.852-1.633	0.32	0.16
GWIS SCZ-MDD	0.2	1.042	0.749-1.448	0.809	0.404
GWIS SCZ-BD	5e-08	1.474	0.972-2.235	0.0681	0.034
GWIS SCZ-BD	1e-07	1.474	0.972-2.235	0.0681	0.034
GWIS SCZ-BD	1e-06	0.963	0.696-1.330	0.817	0.592
GWIS SCZ-BD	1e-05	0.894	0.642-1.244	0.506	0.747
GWIS SCZ-BD	0.0001	0.88	0.632-1.225	0.448	0.776
GWIS SCZ-BD	0.001	0.969	0.695-1.351	0.852	0.574
GWIS SCZ-BD	0.01	1.102	0.807-1.506	0.54	0.27
GWIS SCZ-BD	0.05	0.932	0.680-1.277	0.66	0.67
GWIS SCZ-BD	0.1	0.96	0.704-1.308	0.796	0.602
GWIS SCZ-BD	0.2	0.871	0.635-1.194	0.39	0.805
LOAD Alzheimer	5e-08	0.905	0.642-1.274	0.566	0.717
LOAD Alzheimer	1e-07	0.923	0.658-1.296	0.644	0.678
LOAD Alzheimer	1e-06	0.987	0.706-1.380	0.939	0.53
LOAD Alzheimer	1e-05	1.045	0.751-1.452	0.795	0.398
LOAD Alzheimer	0.0001	0.991	0.716-1.370	0.955	0.523
LOAD Alzheimer	0.001	0.896	0.645-1.244	0.511	0.745
LOAD Alzheimer	0.01	0.81	0.579-1.133	0.219	0.891
LOAD Alzheimer	0.05	1.026	0.748-1.408	0.873	0.437
LOAD Alzheimer	0.1	0.998	0.722-1.380	0.99	0.505
LOAD Alzheimer	0.2	1.132	0.822-1.560	0.447	0.223

## Sheet: Table S10. FAM MDD - FAM unaff
Supplementary Table S10: Full association test results for the comparison of PRS between FAMMDD cases and FAMunaffected. Fixed effects covariates: Sex, age at interview; random effects covariate: married-in status.
PRS	Threshold	OR	95 % CI	p-value	p-value 1-sided
Bipolar Disorder	5e-08	1.099	0.816-1.480	0.533	0.267
Bipolar Disorder	1e-07	1.163	0.867-1.561	0.313	0.156
Bipolar Disorder	1e-06	1.163	0.862-1.570	0.323	0.161
Bipolar Disorder	1e-05	1.434	1.040-1.977	0.0277	0.0139
Bipolar Disorder	0.0001	1.435	1.040-1.979	0.0279	0.0139
Bipolar Disorder	0.001	1.179	0.855-1.625	0.315	0.157
Bipolar Disorder	0.01	1.199	0.877-1.641	0.255	0.128
Bipolar Disorder	0.05	0.987	0.716-1.361	0.936	0.532
Bipolar Disorder	0.1	0.988	0.719-1.358	0.941	0.529
Bipolar Disorder	0.2	1.132	0.822-1.560	0.447	0.224
Schizophrenia	5e-08	1.141	0.834-1.561	0.41	0.205
Schizophrenia	1e-07	1.108	0.805-1.525	0.528	0.264
Schizophrenia	1e-06	1.098	0.807-1.492	0.552	0.276
Schizophrenia	1e-05	1.054	0.775-1.434	0.736	0.368
Schizophrenia	0.0001	1.086	0.807-1.462	0.586	0.293
Schizophrenia	0.001	0.818	0.603-1.111	0.199	0.901
Schizophrenia	0.01	0.759	0.557-1.036	0.0822	0.959
Schizophrenia	0.05	0.784	0.577-1.065	0.12	0.94
Schizophrenia	0.1	0.708	0.520-0.962	0.0274	0.986
Schizophrenia	0.2	0.646	0.474-0.882	0.0059	0.997
MDD	5e-08	1.04	0.777-1.393	0.791	0.395
MDD	1e-07	1.071	0.805-1.424	0.638	0.319
MDD	1e-06	0.864	0.647-1.153	0.32	0.84
MDD	1e-05	0.988	0.741-1.315	0.932	0.534
MDD	0.0001	0.899	0.671-1.205	0.477	0.761
MDD	0.001	1.004	0.742-1.356	0.982	0.491
MDD	0.01	1.173	0.864-1.592	0.307	0.153
MDD	0.05	1.325	0.986-1.779	0.062	0.031
MDD	0.1	1.303	0.968-1.755	0.0812	0.0406
MDD	0.2	1.299	0.967-1.746	0.0825	0.0413
Shared	5e-08	0.817	0.607-1.101	0.185	0.908
Shared	1e-07	0.802	0.593-1.085	0.153	0.924
Shared	1e-06	0.88	0.645-1.201	0.421	0.79
Shared	1e-05	1.034	0.761-1.405	0.83	0.415
Shared	0.0001	1.2	0.893-1.611	0.227	0.113
Shared	0.001	1.263	0.927-1.721	0.14	0.0698
Shared	0.01	1.232	0.917-1.656	0.167	0.0834
Shared	0.05	1.239	0.926-1.658	0.149	0.0747
Shared	0.1	1.256	0.939-1.682	0.125	0.0624
GWIS MDD-BD	5e-08	0.875	0.644-1.188	0.391	0.804
GWIS MDD-BD	1e-07	0.857	0.633-1.160	0.317	0.841
GWIS MDD-BD	1e-06	0.928	0.685-1.256	0.627	0.686
GWIS MDD-BD	1e-05	0.865	0.644-1.163	0.338	0.831
GWIS MDD-BD	0.0001	0.853	0.634-1.148	0.295	0.852
GWIS MDD-BD	0.001	0.94	0.697-1.267	0.683	0.658
GWIS MDD-BD	0.01	1.078	0.797-1.457	0.627	0.313
GWIS MDD-BD	0.05	1.051	0.782-1.412	0.741	0.37
GWIS MDD-BD	0.1	1.036	0.767-1.399	0.817	0.409
GWIS MDD-BD	0.2	1.083	0.798-1.469	0.609	0.304
GWIS MDD-SCZ	5e-08	1.103	0.824-1.477	0.51	0.255
GWIS MDD-SCZ	1e-07	1.072	0.802-1.433	0.639	0.319
GWIS MDD-SCZ	1e-06	0.929	0.699-1.234	0.612	0.694
GWIS MDD-SCZ	1e-05	0.91	0.679-1.219	0.528	0.736
GWIS MDD-SCZ	0.0001	0.788	0.584-1.061	0.117	0.942
GWIS MDD-SCZ	0.001	0.779	0.573-1.059	0.111	0.944
GWIS MDD-SCZ	0.01	0.912	0.679-1.224	0.539	0.731
GWIS MDD-SCZ	0.05	1.109	0.824-1.492	0.495	0.248
GWIS MDD-SCZ	0.1	1.068	0.791-1.443	0.666	0.333
GWIS MDD-SCZ	0.2	1.116	0.830-1.501	0.468	0.234
GWIS BD-MDD	5e-08	0.842	0.612-1.159	0.292	0.854
GWIS BD-MDD	1e-07	0.881	0.636-1.219	0.443	0.779
GWIS BD-MDD	1e-06	0.961	0.707-1.308	0.802	0.599
GWIS BD-MDD	1e-05	1.134	0.828-1.552	0.435	0.217
GWIS BD-MDD	0.0001	1.034	0.763-1.400	0.831	0.415
GWIS BD-MDD	0.001	1.267	0.916-1.752	0.153	0.0766
GWIS BD-MDD	0.01	0.951	0.680-1.330	0.768	0.616
GWIS BD-MDD	0.05	1.096	0.805-1.494	0.561	0.28
GWIS BD-MDD	0.1	1.093	0.804-1.487	0.569	0.285
GWIS BD-MDD	0.2	1.061	0.778-1.447	0.708	0.354
GWIS SCZ-MDD	5e-08	1.582	1.138-2.200	0.00632	0.00316
GWIS SCZ-MDD	1e-07	1.37	0.987-1.902	0.0597	0.0298
GWIS SCZ-MDD	1e-06	1.128	0.831-1.529	0.44	0.22
GWIS SCZ-MDD	1e-05	1.069	0.783-1.461	0.674	0.337
GWIS SCZ-MDD	0.0001	1.133	0.841-1.527	0.412	0.206
GWIS SCZ-MDD	0.001	0.921	0.680-1.248	0.597	0.702
GWIS SCZ-MDD	0.01	0.775	0.574-1.046	0.0952	0.952
GWIS SCZ-MDD	0.05	0.703	0.520-0.951	0.0223	0.989
GWIS SCZ-MDD	0.1	0.698	0.521-0.935	0.0159	0.992
GWIS SCZ-MDD	0.2	0.631	0.465-0.855	0.003	0.999
GWIS SCZ-BD	5e-08	1.092	0.813-1.468	0.559	0.28
GWIS SCZ-BD	1e-07	1.092	0.813-1.468	0.559	0.28
GWIS SCZ-BD	1e-06	0.845	0.628-1.137	0.266	0.867
GWIS SCZ-BD	1e-05	0.969	0.717-1.310	0.837	0.581
GWIS SCZ-BD	0.0001	0.945	0.700-1.277	0.713	0.643
GWIS SCZ-BD	0.001	0.901	0.676-1.202	0.478	0.761
GWIS SCZ-BD	0.01	0.786	0.585-1.055	0.109	0.946
GWIS SCZ-BD	0.05	0.786	0.586-1.054	0.107	0.946
GWIS SCZ-BD	0.1	0.73	0.547-0.974	0.0324	0.984
GWIS SCZ-BD	0.2	0.686	0.512-0.919	0.0115	0.994
LOAD Alzheimer	5e-08	0.831	0.604-1.145	0.258	0.871
LOAD Alzheimer	1e-07	0.838	0.611-1.150	0.274	0.863
LOAD Alzheimer	1e-06	0.862	0.628-1.184	0.36	0.82
LOAD Alzheimer	1e-05	0.865	0.633-1.181	0.362	0.819
LOAD Alzheimer	0.0001	0.904	0.672-1.217	0.507	0.747
LOAD Alzheimer	0.001	1.037	0.759-1.417	0.819	0.41
LOAD Alzheimer	0.01	0.906	0.660-1.243	0.54	0.73
LOAD Alzheimer	0.05	0.97	0.705-1.333	0.85	0.575
LOAD Alzheimer	0.1	1.055	0.758-1.467	0.752	0.376
LOAD Alzheimer	0.2	1.084	0.785-1.497	0.623	0.311

[truncated: 1 more sheets: Table S11. CC BD - CC ctrl]
